# COVID-19 pandemic re-shaped the global dispersal of seasonal influenza viruses

Zhiyuan Chen<sup>1,2</sup>, Joseph L.-H. Tsui<sup>2</sup>, Bernardo Gutierrez<sup>2,3</sup>, Simon Busch Moreno<sup>2</sup>,  
Louis du Plessis<sup>4,5</sup>, Xiaowei Deng<sup>6</sup>, Jun Cai<sup>1</sup>, Sumali Bajaj<sup>2</sup>, Marc A. Suchard<sup>7</sup>, Oliver G. Pybus<sup>2,8,9,‡</sup>,  
Philippe Lemey<sup>10,‡,\*</sup>, Moritz U. G. Kraemer<sup>2,9,‡,\*</sup>, Hongjie Yu<sup>1,‡,\*</sup>

## Affiliations

1. Department of Epidemiology, School of Public Health, Key Laboratory of Public Health Safety, Ministry of Education, Fudan University, Shanghai, China
2. Department of Biology, University of Oxford, Oxford, UK
3. Colegio de Ciencias Biologicas y Ambientales, Universidad San Francisco de Quito USFQ, Quito, Ecuador
4. Department of Biosystems Science and Engineering, ETH Zürich, Basel, Switzerland
5. Swiss Institute of Bioinformatics, Lausanne, Switzerland
6. Department of Epidemiology, National Vaccine Innovation Platform, School of Public Health, Nanjing Medical University, Nanjing, China
7. Departments of Biostatistics, Biomathematics and Human Genetics, University of California, Los Angeles, Los Angeles, CA, USA
8. Department of Pathobiology and Population Sciences, Royal Veterinary College, London, UK
9. Pandemic Sciences Institute, University of Oxford, Oxford, UK
10. Department of Microbiology, Immunology and Transplantation, Rega Institute, KU Leuven, Leuven, Belgium

‡ Contributed equally as senior authors

\* Correspondence: [moritz.kraemer@biology.ox.ac.uk](mailto:moritz.kraemer@biology.ox.ac.uk); [philippe.lemey@kuleuven.be](mailto:philippe.lemey@kuleuven.be); [yhj@fudan.edu.cn](mailto:yhj@fudan.edu.cn)

## 26 **Abstract**

27 Understanding how the global dispersal patterns of seasonal influenza viruses were perturbed during and after  
28 the COVID-19 pandemic is needed to inform influenza intervention and vaccination strategies in the post-  
29 pandemic period. Although global human mobility has been identified as a key driver of influenza dispersal<sup>1</sup>,  
30 alongside climatic and evolutionary factors<sup>2,3</sup>, the impact of international travel restrictions on global influenza  
31 transmission and recovery remains unknown. Here we combine molecular, epidemiological, climatic, and  
32 international travel data within a phylodynamic framework to show that, despite human mobility remaining the  
33 principal driver of global influenza virus dissemination, the pandemic's onset led to a shift in the international  
34 population structure and migration network of seasonal influenza lineages. We find that South Asia and Africa  
35 played important roles as exporters and phylogenetic trunk locations of influenza in 2020 and 2021, and we  
36 highlight the association between population movement, antigenic drift and persistence during the intensive  
37 non-pharmaceutical interventions (NPIs) phase. The influenza B/Yamagata lineage disappeared in a context of  
38 reduced relative genetic diversity, moderate lineage turnover, and lower positive selection pressure. Our results  
39 demonstrate that mobility perturbations reshaped the global dispersal dynamics of influenza viruses, with  
40 potential implications for vaccine design and genomic surveillance programmes. As the risk of future  
41 pandemics persists, our study provides an opportunity to assess the impact of NPIs during the pandemic on  
42 respiratory infectious diseases beyond the interplay between SARS-CoV-2 and influenza viruses.

43

## 44 **Keywords**

45 Seasonal influenza, migration network, human mobility, COVID-19 pandemic, phylogeography

## 46 Main

47 Seasonal influenza epidemics place substantial burdens on healthcare systems and cause >5 million  
48 hospitalizations among adults every year<sup>4</sup>. The global spread of recurring seasonal influenza is strongly  
49 associated with global air travel<sup>1,5-7</sup> as well as with the periodic antigenic evolution of influenza viruses that  
50 permit immune escape from vaccine- and/or infection-induced immunity<sup>8</sup>.

51  
52 The implementation of non-pharmaceutical interventions (NPIs) in 2020 in response to the COVID-19  
53 pandemic affected the evolution and circulation of seasonal influenza viruses<sup>9</sup> and other respiratory pathogens<sup>10</sup>.  
54 Following the introduction of NPIs, a rapid decline in influenza transmission was observed worldwide, leading  
55 to changes in accumulation of population immunity and substantial genetic bottlenecks constraining virus  
56 diversity<sup>8</sup>. Influenza transmission and dispersal resurged in late 2021 after the relaxation of NPIs, but one  
57 influenza B virus lineage, B/Yamagata, has been reported only rarely since March 2020<sup>11</sup>. This led the World  
58 Health Organization (WHO) to recommend using trivalent vaccines that exclude the B/Yamagata strain in the  
59 2024 southern hemisphere influenza season<sup>12</sup>.

60  
61 The current paradigm for influenza vaccine development emphasises timely evaluation of the antigenic and  
62 genetic characteristics of circulating strains<sup>13</sup>, especially those sampled from previously identified source  
63 populations (including subtropical and tropical East Asia, Southeast Asia, and occasionally India for  
64 A/H3N2)<sup>14,15</sup>. We hypothesised that the NPIs implemented during the COVID-19 pandemic reshaped the spatial  
65 dissemination and evolutionary patterns of seasonal influenza in a geographically-heterogeneous manner.

66  
67 By combining epidemiological, genetic, and international travel data together in a phylodynamic framework, we  
68 estimate the spatio-temporal population structure, persistence patterns, and evolutionary diversity of seasonal  
69 influenza before, during, and after the NPIs-intensive phase of the COVID-19 pandemic.

## 71 Results

### 72 Decline in global influenza transmission

73 Using the COVID-19 stringency index and monthly air passenger volumes over time (**Extended Data Fig. 1**),  
74 we defined three “periods” with distinct patterns of global human mobility: period 1 is prior to population-level  
75 behavioural changes in response to the COVID-19 pandemic (1 February 2018 - 31 January 2020), period 2 is  
76 characterised by high-stringency interventions (referred to as NPIs-intensive phase) that aimed to limit  
77 population mixing between 1 February 2020 and 31 July 2021, and period 3 covers the time when international  
78 travel mostly had recovered (1 August 2021 to 31 July 2023).

79  
80 We obtained influenza virological surveillance data from the Global Influenza Surveillance and Response  
81 System (GISRS)<sup>16</sup>, which collates data from specimens from patients with influenza-like illness that have been  
82 tested for influenza viruses at National Influenza Centres, national influenza reference laboratories, and other  
83 non-sentinel systems<sup>17</sup>. The antigenic and genetic characterisation of influenza viruses collected via this  
84 network form the basis of WHO annual recommendations for the composition of influenza vaccines. The

85 number of specimens processed for influenza testing remained stable during the NPIs-intensive phase compared  
86 to previous influenza seasons, and doubled in 2022 and 2023 (**Fig. 1a**). This rise is possibly due to an increase  
87 in the global capacity for viral surveillance established during the pandemic, and a re-focus on influenza  
88 sentinel surveillance as COVID-19 cases subsided<sup>18</sup>. The proportion of laboratory confirmed influenza cases  
89 that were subsequently sequenced during the NPIs-intensive phase of the pandemic was generally above 10%;  
90 this proportion was lower in 2019 and 2022, 2023 (**Fig. 1b**). Even though surveillance intensity for seasonal  
91 influenza was maintained during the pandemic, we cannot rule out possible biases inherent to influenza  
92 databases of virological and genomic surveillance<sup>16,19</sup>.

93  
94 The fraction of specimens that tested positive for influenza viruses remained low during the NPIs-intensive  
95 period (< 0.10% for H1N1pdm09, <0.25% for H3N2, and <0.50% for B/Victoria in each week from May 2020  
96 to July 2021), compared to the peak positivity rates of H1N1pdm09 (14.5%), H3N2 (6.0%), and B/Victoria  
97 (10.7%) during the 2019-2020 northern hemisphere winter (**Fig. 1c, 1e, 1g**). To account for variation in the  
98 number of specimens across the three periods, we also calculated the ratio of positive influenza cases to the total  
99 number of specimens processed in each period. These data also indicate low levels of influenza transmission  
100 after the emergence of SARS-CoV-2 (**Extended Data Fig. 2**). However, several small-scale influenza  
101 outbreaks occurred in Asia (mainly in South Asia, Southeast Asia, and China) and Africa in period 2 (**Fig. 1d,**  
102 **1f, 1h, 1j**), both in areas with high and low COVID-19 burden and varying levels of population mixing. A  
103 H3N2 wave occurred during the 2021-2022 northern hemisphere winter season, with a double peak before and  
104 after the winter holidays, coinciding with large waves of SARS-CoV-2 Omicron BA.1 and BA.2 infection<sup>20</sup>.  
105 This H3N2 wave was followed by a H1N1pdm09 wave in the first half of 2022 and a B/Victoria wave, although  
106 low-level local circulation of B/Victoria continued across Asia (mainly China and South Asia) and Africa  
107 during the NPIs-intensive phase (**Fig. 1c-h**). A few B/Yamagata cases were sporadically reported after the onset  
108 of pandemic, however these might originate from vaccine-derived cases or potential data errors<sup>11,21</sup>. Substantial  
109 transmission of H1N1pdm09, H3N2, and B/Victoria occurred in the 2022-2023 northern hemisphere winter  
110 season, during which weekly positivity rates peaked at 15.0% for H3N2 (**Fig. 1c-h**).

111

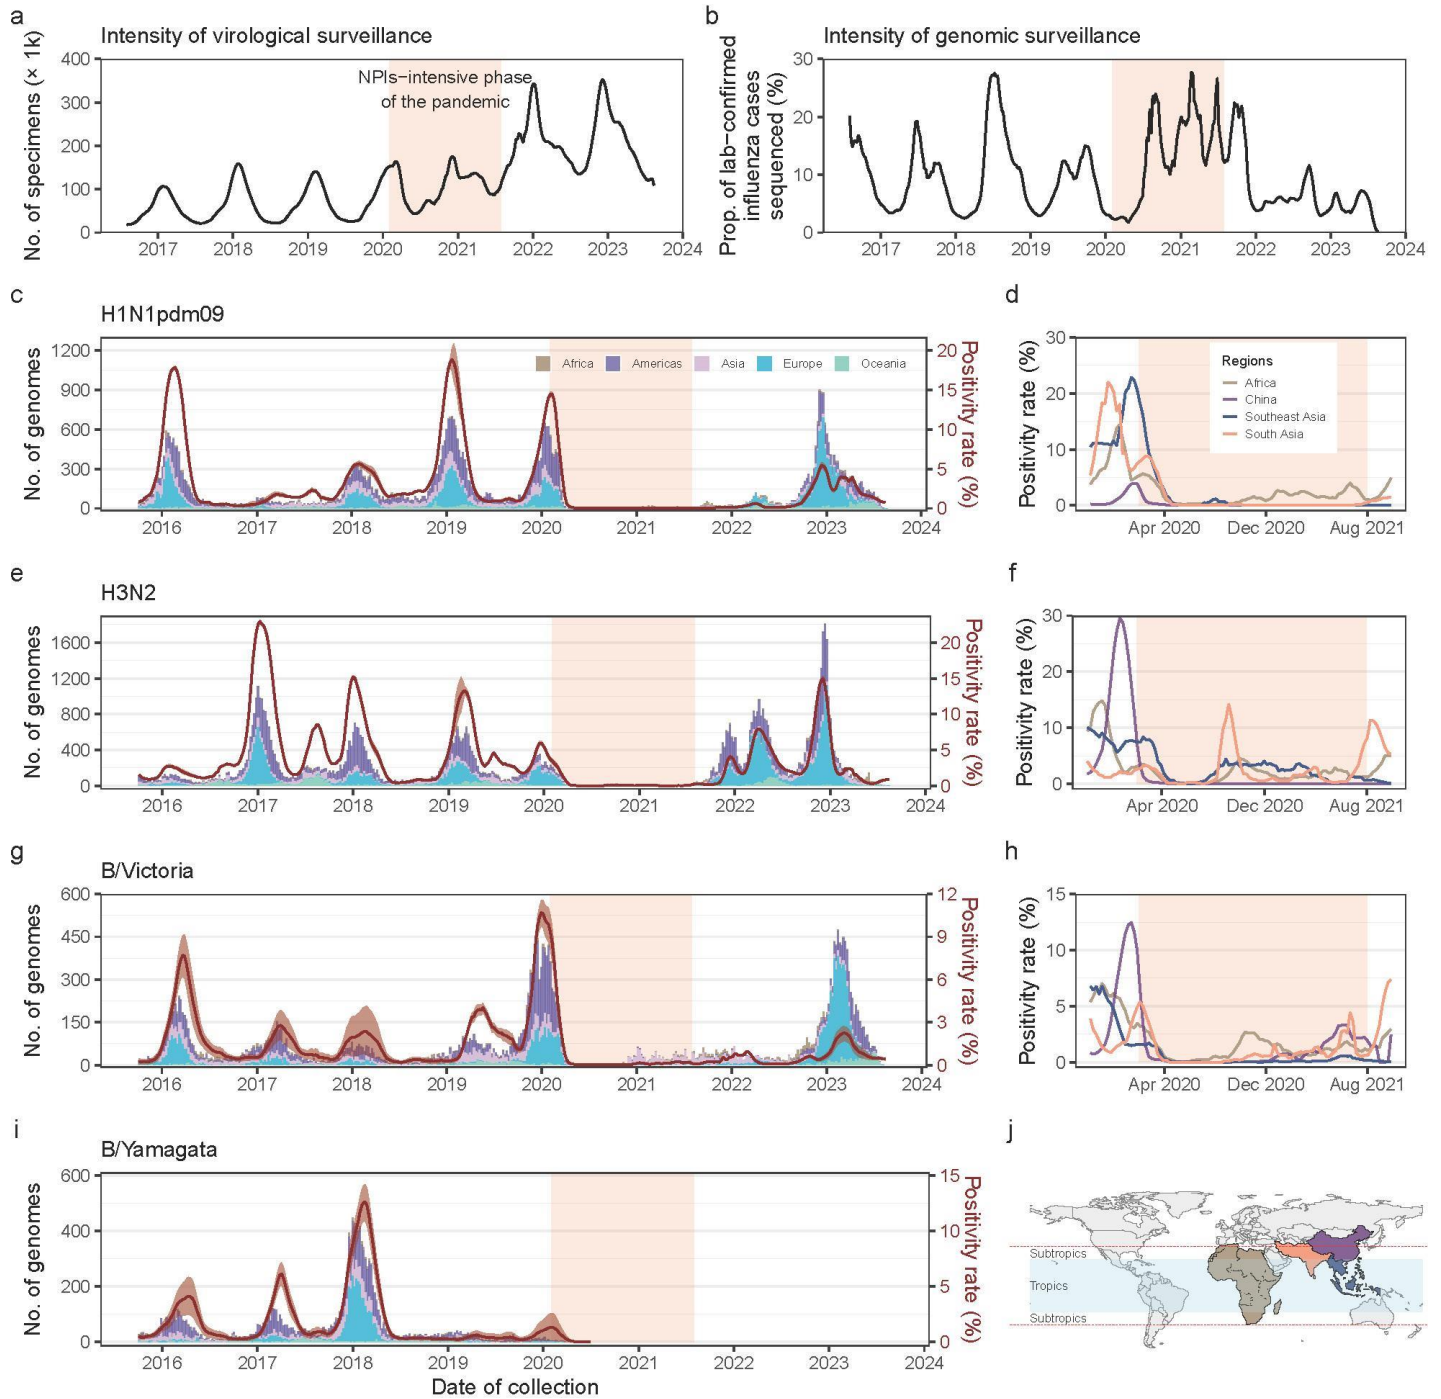

**Fig 1 | Surveillance intensity, distribution of genetic sequences, and positivity rates of seasonal influenza viruses.** *a*, Intensity of virological surveillance of influenza indicated by the rolling numbers of specimens processed globally for the test of influenza virus. *b*, Intensity of genomic surveillance of influenza indicated by the rolling percentages of reported influenza cases sequenced at high quality. *c-i*, The weekly count of high-quality genetic sequences (HA segment, stratified by continent) and global positivity rates among tested specimens for H1N1pdm09 (*c*), H3N2 (*e*), B/Victoria (*g*) and B/Yamagata (*i*). The positivity rates of

119 *H1N1pdm09 (d)*, *H3N2 (f)*, *B/Victoria (h)* are also presented separately for regions that experienced influenza  
120 waves during the NPIs-intensive phase of pandemic (Africa, China, Southeast Asia, and South Asia). **j**, The  
121 geographic location of Africa, China, Southeast Asia, and South Asia in reference to tropical and subtropical  
122 latitudinal limits. Positivity rates are presented as central-aligned rolling averages (5-week window), and the  
123 95% intervals indicate uncertainty in inferring the specific subtypes or lineages using a Bayesian framework.  
124 The light orange shadow area represents the NPIs-intensive phase of the COVID-19 pandemic, defined as  
125 spanning from 1 February 2020 to 31 July 2021.

### 127 **Air passenger traffic as a predictor of influenza spread**

128 The spatial spread of influenza virus has been shown previously to be associated with climatic factors (primarily  
129 humidity)<sup>22</sup> and global human mobility<sup>1</sup>. Disruptions to air travel, like those during September 2001 in the  
130 United States, have been shown to impact the timing of subsequent influenza season<sup>23</sup>. To infer period-specific  
131 predictors and to account for potential variation in rates of viral dispersal across the three periods defined above,  
132 we constructed a 3-period Bayesian phylogeographic generalised linear model (GLM) framework and applied it  
133 to clades of influenza viruses circulating from November 2016 (September 2013 for B/Yamagata) to July 2023  
134 (see **Methods**). To account for potential biases in genetic sampling, we adopted three sub-sampling strategies  
135 for high-quality genetic sequences (hemagglutinin, HA, segment) (**Supplementary Fig 1**): (i) even sub-  
136 sampling, (ii) sub-sampling while accounting for temporal variation, and (iii) sub-sampling while accounting  
137 for both temporal and spatial variation (see **Methods**). These schemes were used to generate sets of ~2,000  
138 sequences for each influenza subtype/lineage, with collection dates up to 31 July 2023 (**Extended Data Fig. 3**)  
139 and sampled from 12 geographic regions (Africa, North America, South America, Europe, Russia, North China,  
140 South China, Japan/Korea, South Asia, West Asia, Southeast Asia, and Oceania; **Supplementary Fig 2**).  
141 Covariates related to demographic, meteorological, air passenger traffic, geographic, and sampling factors were  
142 included in the GLM model to explore their period-specific associations with virus lineage movements  
143 (**Supplementary Fig 3-5, Supplementary Table 1-3**).

144  
145 We observed heterogeneous patterns in the reduction of air passenger traffic between each pair of regions  
146 during the pandemic (**Fig. 2a-f, Supplementary Fig 6**), although the structure of the airline network did not  
147 change fundamentally (Mantel statistic R between period 1 and period 2: 0.941,  $p < 0.01$ ; between period 1 and  
148 period 3: 0.917,  $p < 0.01$ ). During the second period, the most severe reduction in bidirectional air traffic  
149 occurred between China and other regions. During this time air traffic between North China and Russia, North  
150 America, Southeast Asia, South America, Oceania, and Europe all dropped to <7.5% of pre-pandemic levels  
151 (**Fig. 2e**). Following the relaxation of NPIs (period 3), the rate of recovery of air traffic volumes also varied  
152 across regions, with slower recoveries in Asia (e.g., Southeast Asia, China, Japan/Korea) and Oceania (**Fig. 2d**).  
153 Average monthly air passenger traffic during the third period had not recovered to >10.0% of pre-pandemic  
154 levels on routes between North China and North America, and between Japan/Korea and Russia (**Fig. 2f**).

155  
156 Despite changes in travel volumes, air passenger traffic among regions remained a significant predictor of the  
157 global spread of influenza across all periods (**Fig. 2g**; results consistent among three sub-sampling schemes;

158 **Extended Data Fig. 4).** As sample size had a lower predictive power under the “even sub-sampling” scheme,  
 159 we chose that sampling scheme for the main analysis, similar to a previous study<sup>15</sup>. Climatic and demographic  
 160 factors were not identified as significant predictors for influenza spread, which we hypothesise might be a  
 161 consequence of the high level of spatial aggregation of the predictor variables.  
 162

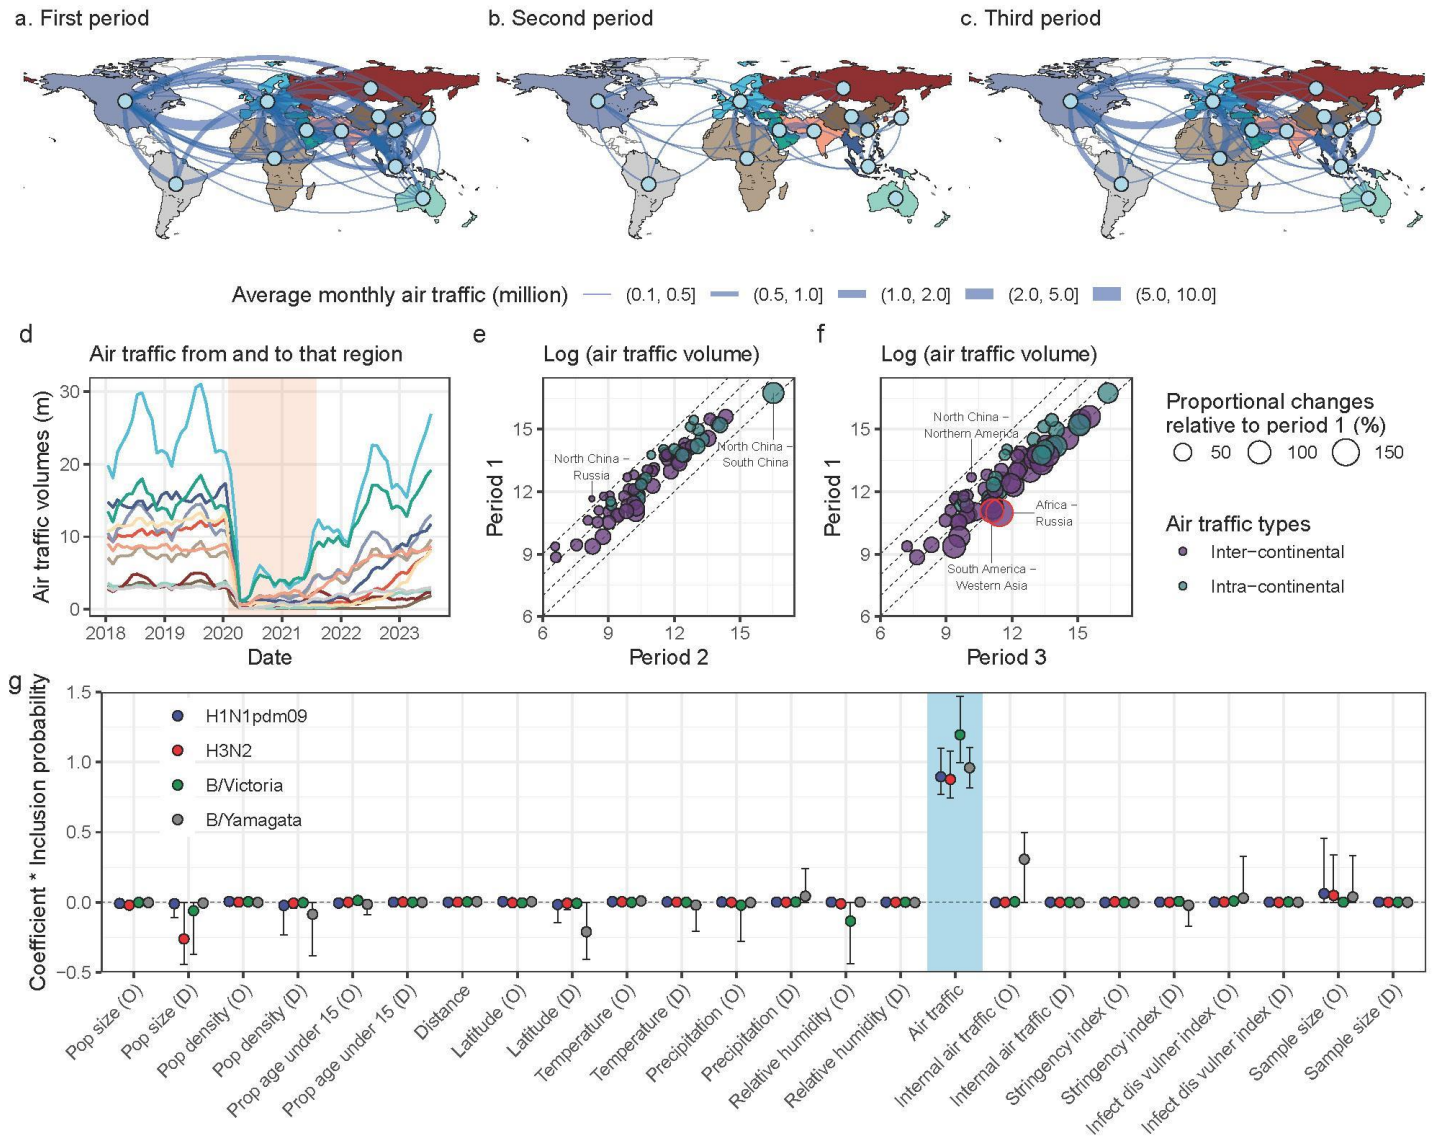

163

164

165

166

167

168

169

170

171

**Fig 2 | Predictors of global movements of seasonal influenza virus using a 3-period phylogeographic GLM model.** *a-c*, Average monthly air passenger traffic network between 12 geographic regions across three periods. Here, routes with average monthly air traffic passengers of more than 100,000 are only presented for a clear visualisation. *d*, Region-specific monthly air traffic from and to that region over time. The air traffic between south China and north China was not included in this calculation. Colours correspond to the coloured background of the global map in panel *a-c*. *e-f*, Using first period as baseline, comparison of average monthly bidirectional passenger air traffic volume in each pair of regions with that in the second and third period, respectively. Bidirectional air traffic routes among 12 regions were presented as points coloured by the

172 *intercontinental or intracontinental type. Routes with more than 100% recovery are marked in a red frame. g,*  
173 *Posterior summaries of the product of the log predictor inclusion probability pooled across the three periods*  
174 *and constant-through-time predictor coefficient in GLM model for H1N1pdm09, H3N2, and B/Victoria*  
175 *influenza virus. Analyses for B/Yamagata virus were performed under a time-homogeneous (1-period) GLM*  
176 *model since few genetic data available after March 2020. Points and ranges represent the posterior mean and*  
177 *95% highest posterior density (HPD) intervals, respectively. Location-specific predictors were included for*  
178 *both origin (O) and destination (D) locations in the pairwise transition rates.*

## 180 Reshaping global influenza circulation dynamics

181 Changes in human behaviours and air passenger traffic during the pandemic may have perturbed the local and  
182 global circulation dynamics of seasonal influenza. To investigate this, we used time-variable air traffic volumes  
183 as a sole predictor of among-location lineage transition rates and extended the phylogeographic model to also  
184 include overall air traffic as a predictor for the overall transition rates (see **Methods, Supplementary Table 4**).  
185 We first estimated trends through time in the number of lineage movement events (**Fig. 3a**). Second, we  
186 investigated how the among-location migration network changed across all periods (**Fig. 3b-e, Extended Data**  
187 **Fig. 5-6**) and computed changes in net lineage export events (export event count minus import event count), per  
188 region per period (**Extended Data Fig. 7**). Third, we inferred the time-varying location of the trunk  
189 phylogenetic branch based on our phylogeographic analysis (**Fig. 4**). As in previous studies, this branch  
190 represents the lineage(s) that successfully persists from one epidemic season to the next, under the defined  
191 sampling scheme<sup>1</sup>.

192  
193 The H1N1pdm09, H3N2, and B/Victoria lineages all exhibited seasonal fluctuations in the number of among-  
194 location movements, while the B/Yamagata lineage showed fewer and declining events before the pandemic  
195 (**Fig. 3a, Extended Data Fig. 5-6**). During period 1 we identified a higher number of H1N1pdm09 lineage  
196 movements between Southeast Asia and South China (**Fig. 3b**), as well as a higher number of H3N2 and  
197 B/Victoria transitions between northern and southern China (**Fig. 3c-d**). Conversely, few B/Yamagata  
198 movements originated from Asia (**Fig. 3e**). In period 2 virus movements decreased substantially, although some  
199 B/Victoria movements between northern and southern China were still observed (**Fig. 3d**). This could be related  
200 to (i) B/Victoria's greater local persistence between seasons<sup>15</sup>, (ii) its acquisition of adaptive amino acid  
201 mutations during intensive NPIs<sup>24</sup>, and (iii) higher relative human mobility between these regions due to low  
202 local COVID-19 prevalence (at a time when prevalence was higher in other world regions). During period 3,  
203 there was some re-emergence of lineage movement, which varied across regions and virus subtypes/lineages  
204 (**Fig. 3, Extended Data Fig. 5-6**). Generally, a shift to higher virus movements from South Asia to West Asia  
205 occurred, especially for H1N1pdm09 and B/Victoria (**Fig. 3b-d**). Unlike virus lineage movements from Asia,  
206 which occurred at high rates after the peak of pandemic restrictions in early August 2021 (**Extended Data Fig.**  
207 **5a-c**), lineage movements from North America were limited until late 2022; this is most evident for influenza A  
208 viruses, which showed limited spread from North America to Europe during the summer of 2021 (**Extended**  
209 **Data Fig. 5-6**). Lineage movements among regions returned to pre-pandemic patterns by mid-2022 (**Extended**  
210 **Data Fig. 5**), although the absolute number of observed movements was lower than before the pandemic (**Fig**  
211 **3a, Extended Data Fig. 5**).



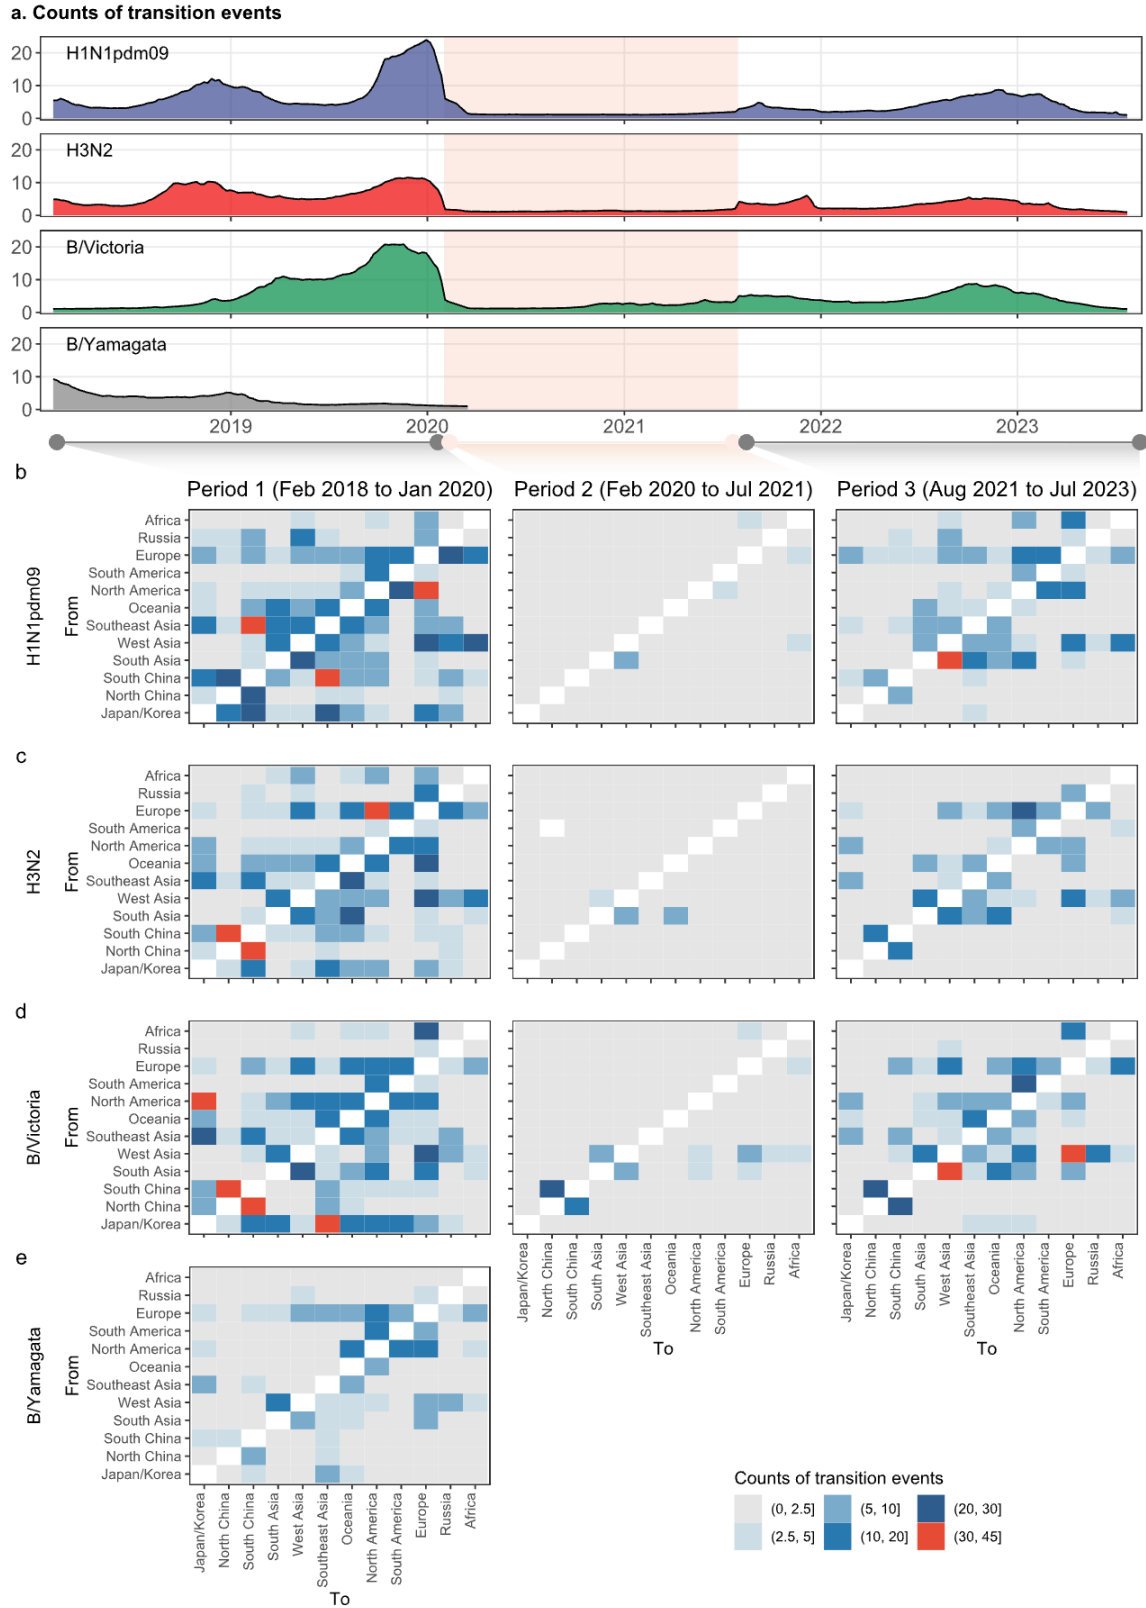

212

213

214

**Fig 3 / The migration dynamic of seasonal influenza virus across the three periods. a, The weekly counts of Markov jumps (location transition events) over time for four influenza subtypes/lineages. b-e, Estimates of**

215 *location transition events between each pair of the geographic regions in three periods under the even sub-*  
216 *sampling scheme. Analyses are based on the posterior summaries of the Markov jumps under a time-*  
217 *inhomogeneous (3-period) GLM model with only air traffic data as the predictor of overall and relative*  
218 *transition rates, except for B/Yamagata under a time-homogeneous (1-period) GLM model.*

219  
220 Period- and region-specific lineage exports were heterogeneous among locations and time periods. Based on our  
221 phylogeographic model, we inferred that Asia was the main net exporter of H1N1pdm09 and B/Victoria  
222 lineages in period 1. However, within Asia there was a shift towards lineage net export from South Asia after  
223 the NPI-intensive phase of the pandemic (**Extended Data Fig. 7a, 7c**). South Asia became the sole source of  
224 observed net lineage exports of H3N2 in period 2; Europe was identified as a notable net exporter in period 3,  
225 and meanwhile more importations occurred in Southeast Asia than exportations in that period (**Extended Data**  
226 **Fig. 7b**). This shift may be the consequence of the timing and intensity of reopening of European air travel  
227 compared to that in Asia.

228  
229 For the two years before the start of the COVID-19 pandemic, we infer that H1N1pdm09 trunk lineages were  
230 most likely located in East-Southeast Asia and South Asia. Although the posterior probability of the trunk  
231 lineage being in Africa grew after 2019, the posterior probability for the location of the H1N1pdm09 trunk  
232 lineage was greatest for South Asia in the second and third periods (**Fig. 4a**), consistent with the net export  
233 results described above (**Extended Data Fig. 7a**). For H3N2, we also inferred Asia as the most likely trunk  
234 location during period 1. During period 2, South Asia was the most likely H3N2 trunk location, with a reduced  
235 posterior probability for Southeast Asia (**Fig. 4b**). South Asia, West Asia and Africa together contributed >60%  
236 of the posterior probability for the B/Victoria trunk location (**Fig. 4c**). The B/Yamagata trunk lineage in the pre-  
237 pandemic period was most likely in Southeast Asia in 2014-2015 and Europe in 2016 (**Fig. 4d**).  
238

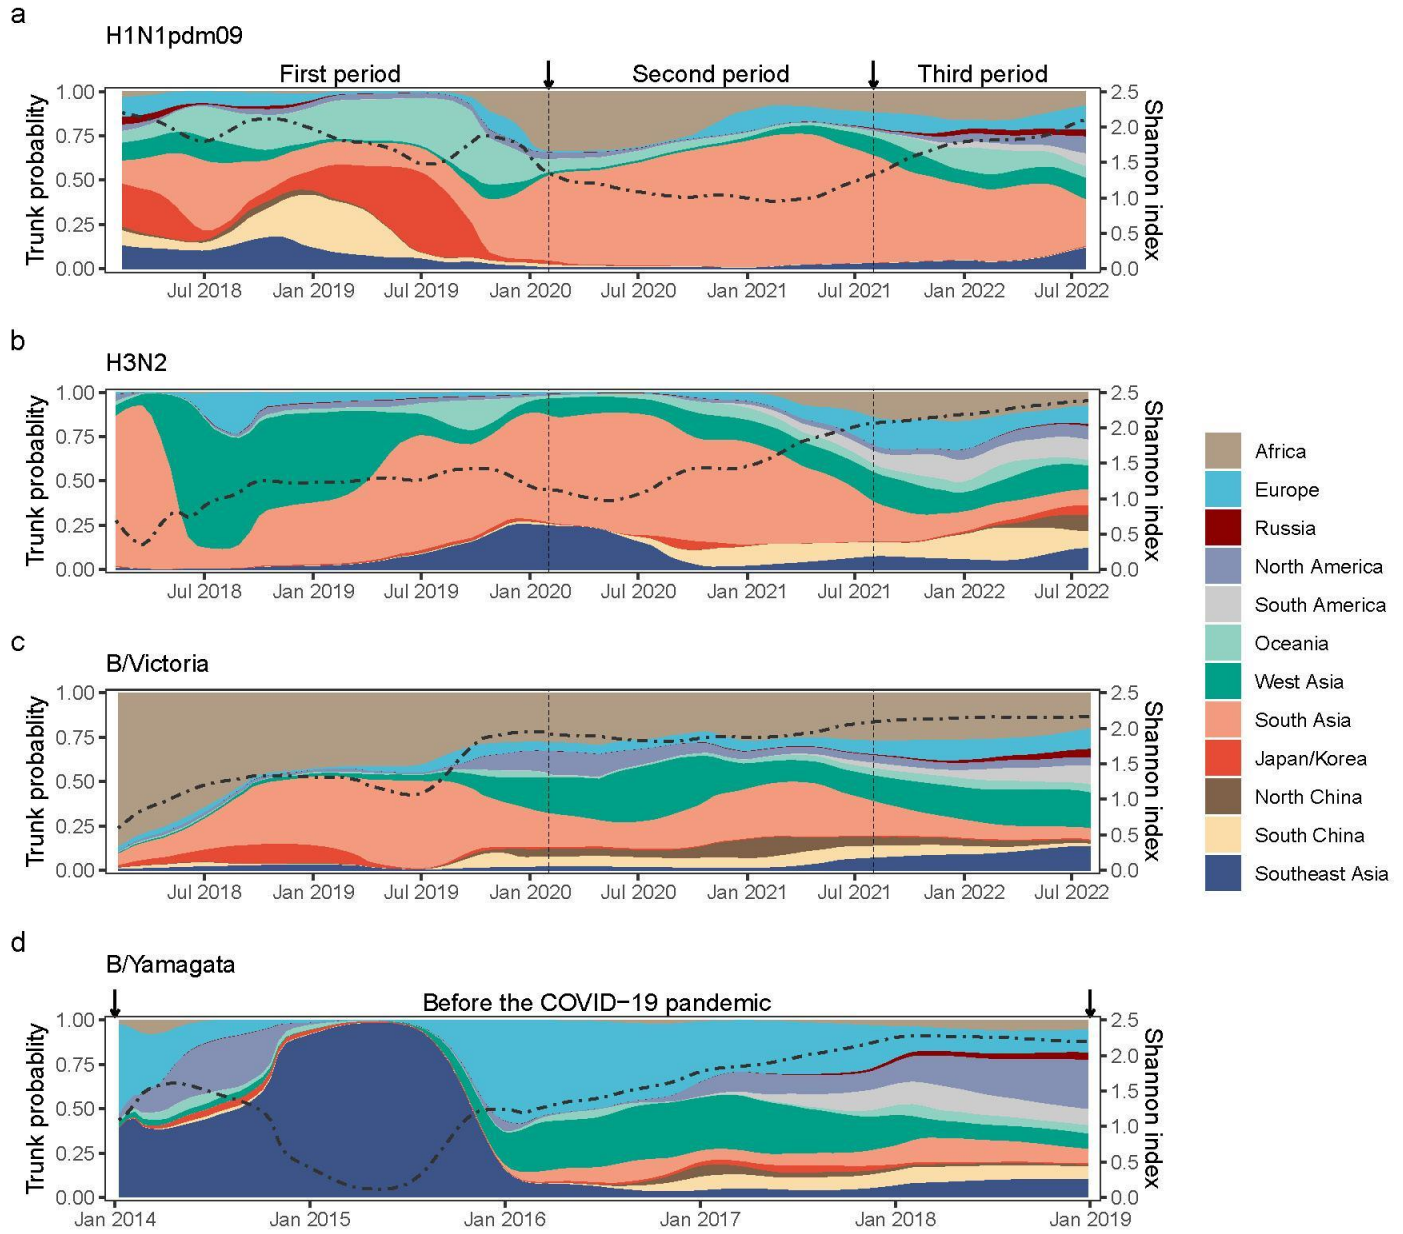

239  
240 **Fig 4 | Inferred trunk location of phylogenetic trees during the three periods.** Trunk probability refers to the  
241 lineage that successfully persists from one epidemic season to the next under our sampling framework. The  
242 trunk probabilities through time are averaged over two subsampling strategies (even sub-sampling, sub-  
243 sampling accounting for temporal variation; see Methods). Variation in trunk lineage diversity is represented  
244 by the Shannon index (dashed black line, second y axis; this value increases as both the number of trunk  
245 lineages and the evenness of their frequencies increase).

## 247 **Heterogeneous persistence patterns and potential drivers**

248 Measures of local persistence of influenza viruses between seasons can help predict the global distribution of  
249 circulating strains and are used to inform vaccine compositions<sup>14</sup>. To investigate drivers of persistence during  
250 the COVID-19 pandemic, we analyse and contrast two measures of persistence across all three periods<sup>15,25</sup>: i)  
251 tip-associated persistence, which represents the time that terminal branches spend in location of the sampled tip,  
252 when moving backwards through the tree, from the sampled tip towards the root (**Methods**), ii) lineage-  
253 associated persistence, which represents the time that each lineage - which is present at a given evaluation time  
254 - spends in its current location, when moving backwards through the tree, towards the root (**Methods**).

255  
256 Tip-associated persistence of influenza viruses during the first period was generally <6 months, although greater  
257 persistence was observed for B/Yamagata (**Extended Data Fig. 8**). In period 2, influenza viruses exhibited  
258 longer persistence, likely due to NPIs reducing long-distance travel and lineage movement (**Fig. 3**) and  
259 subsequent strain replacement. For example, a high tip-associated persistence was observed for H3N2 viruses  
260 circulating in Africa (1.79 years, interquartile range: 1.42-2.14), South Asia (1.40, 1.25-1.70), and Southeast  
261 Asia (0.85, 0.64-1.21, **Extended Data Fig. 8b**). Lineage-associated persistence shows similar trends for H3N2,  
262 which was the only subtype with sufficient data to estimate temporal trends across regions during the second  
263 period (**Extended Data Fig. 9a, Supplementary Fig. 7**).

264  
265 Using a Bayesian hierarchical regression model (**Methods**), we found that air traffic reduction and antigenic  
266 drift (measured using amino acid-based epitope distances<sup>26</sup>) were positively associated with lineage-associated  
267 persistence of H3N2 viruses. During the second period, we found that the association between antigenic drift  
268 and persistence increased in Africa (z-score: 0.74, 90% highest density intervals (HDIs): 0.55-0.91), and that as  
269 persistence increased, air traffic decreased (z-score: 1.05, 0.87-1.23) (**Extended Data Fig. 9b**). Similar  
270 associations between persistence and air traffic reduction were observed in South Asia (**Extended Data Fig.**  
271 **9b**).

272  
273 During the third period, as population mixing increased and international virus lineage movements resurged,  
274 global circulation was re-established resulting in a drop in persistence. However, high persistence of influenza  
275 viruses was still observed in some regions (e.g., H1N1pdm09 in Africa and South Asia; H3N2 in China and  
276 South Asia; B/Victoria in Africa and China, **Extended Data Fig. 8a-c**), potentially because of slower recovery  
277 of air passenger traffic (**Fig. 2d**). As transmission of B/Victoria resumed in the third period, tip-associated  
278 persistence increased in some regions, confirming its relative ability in persisting locally<sup>15</sup> (**Extended Data Fig.**  
279 **8c**).

280  
281 Measures of tip- and lineage-associated persistence used here are based on phylogenetic analyses and cannot be  
282 interpreted as equivalent to the persistence of transmission chains across seasons, due to the impact of sampling  
283 biases of phylogenetic topology and uncertainty in phylogeographic inferences<sup>25,27</sup>. New models that integrate  
284 phylogenetic analyses with mathematical models of transmission of influenza could help bridge this gap.  
285

## Temporal patterns of genetic diversity

Although the global dispersal of influenza A virus subtypes and B/Victoria lineage shifted during the COVID-19 pandemic, the circulation of B/Yamagata lineages likely ceased from early 2020 onwards (**Fig. 5a**). Given that the shared evolutionary history of some influenza B virus segments across the B/Victoria and B/Yamagata lineages, we focussed on the HA segment, one of three segments experiencing distinct evolution in B lineages<sup>28</sup>.

To capture comparative evolutionary dynamics of human influenza virus lineages, we assembled a global genetic dataset of influenza viruses dating back to 2011 (see **Methods**). The relative genetic diversity of influenza A viruses and the B/Victoria lineage declined during the NPIs-intensive phase of the pandemic, and started to accumulate genetic diversity again from the summer of 2021 (**Fig. 5b**). The reduction in genetic diversity was weaker for H3N2 viruses as multiple clades co-circulated (**Extended Data Fig. 10-11**) and accordingly mean pairwise diversity increased since 2013, compared to previous years<sup>29</sup> (**Fig. 5c**). The relative genetic diversity of the B/Yamagata lineage started to decline in 2019 after peaking in 2018, during a time when B/Victoria genetic diversity was increasing. During 2018-2019, there was only a single clade (Y3 clade) of B/Yamagata lineage remaining, which had been singly circulating since 2015 (**Fig. 5a**). The dominance of the Y3 clade after 2015 was linked to a reduction in mean pairwise diversity of B/Yamagata (**Fig. 5c**; also evidenced in dates of common ancestry, see **Extended Data Fig. 12d**). This suggests that genetically similar B/Yamagata lineages circulated each season after 2015. A lower accumulation rate of nonsynonymous substitutions ( $d_N/d_S$ : 0.136) and fewer amino acid residues under positive selection ( $n = 1$ ) in the HA segment of B/Yamagata lineage points to a lower positive selective pressure on the virus (**Supplementary Table 5**), which might correspond to less or slower antigenic drift<sup>30</sup>. In contrast, B/Victoria lineages exhibited a slightly greater  $d_N/d_S$  (0.166) and a higher number of amino acid residues under positive selection ( $n = 4$ ) (**Supplementary Table 5**) in the HA segment that are potentially immune-evasive<sup>24,31</sup>.

The possible “extinction” of B/Yamagata lineages might be explained by a combination of susceptible host depletion due to a large outbreak in 2017-18, NPIs, and slow antigenic evolution<sup>30,32</sup>. More mathematical modelling and empirical investigations are necessary to assess their relative contributions to the possible “extinction” of B/Yamagata.

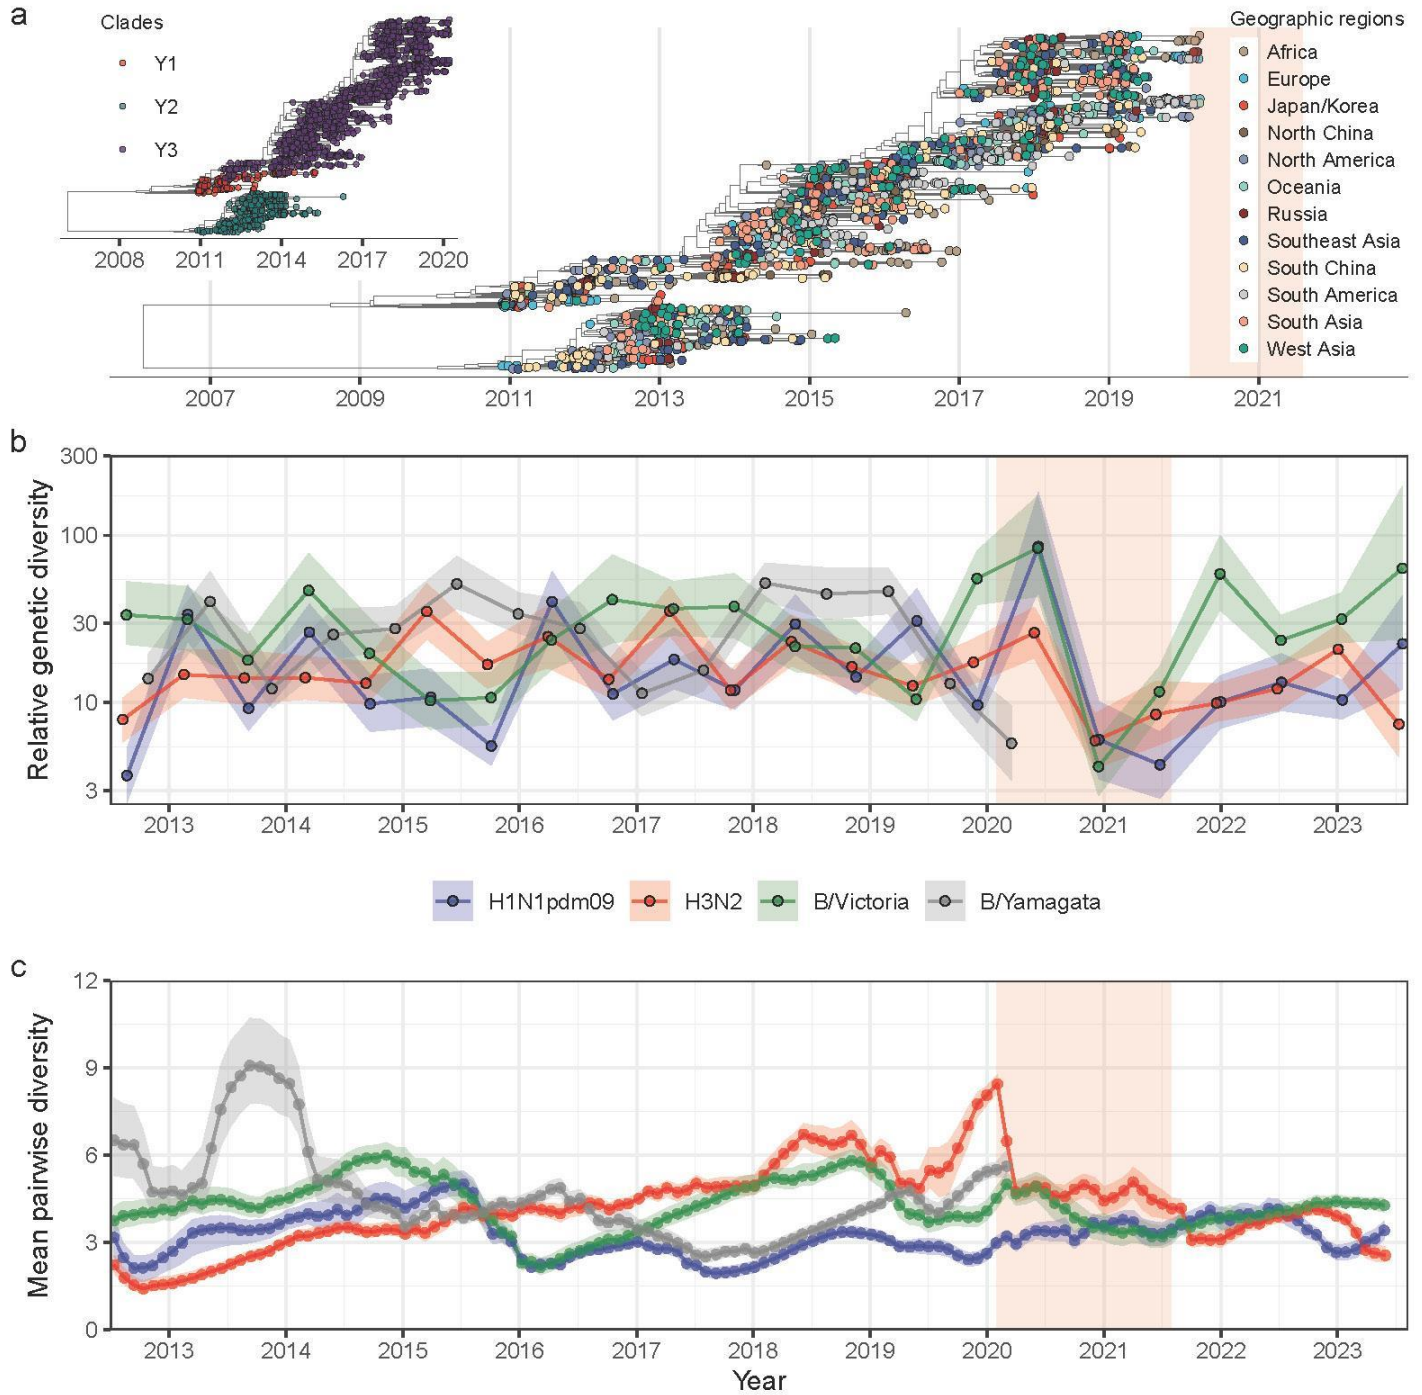

315

316

317

318

319

320

321

**Fig 5 | Genetic diversity of seasonal influenza viruses. a, Maximum clade credibility (MCC) tree for B/Yamagata lineages. Tip colours represent the geographic regions of the sample. The inset shows the MCC tree with tips annotation representing the main B/Yamagata clades. b, Relative genetic diversity of influenza viruses inferred by Bayesian skygrid population reconstruction. c, Mean pairwise diversity of influenza virus, measured as average branch length distance in the unit of years between pairs of tips in phylogeny at monthly intervals.**

## Discussion

We find that the NPIs implemented during the COVID-19 pandemic re-shaped the global dissemination of seasonal influenza. During the period of intensive NPIs, influenza transmission declined globally and only in a few geographical regions did we observe substantial lineage movements. Even though the intensity of global human mobility was greatly reduced, international travel remained the principal driver of the international dissemination of seasonal influenza. Lineage transmission persisted more in regions such as West Asia, Southeast Asia, and Africa. Missing data from Africa meant that its role was previously less explored using phylodynamic approaches<sup>15</sup>. Further data is needed to confirm findings about the role of Africa in the seasonal dissemination of influenza<sup>33</sup>. As air travel resumed, so did seasonal influenza transmission, however global virus lineage movements were less intense than before the pandemic. In late 2023, it appears that influenza outbreaks across some parts of the world are more synchronised than in past years, possibly due to higher availability of susceptible populations<sup>34</sup>.

Other studies have documented the transient alteration of global population structure of H3N2 after the air traffic disruptions in Asia Pacific during the SARS outbreak in 2003<sup>35</sup>. During that time, Southeast Asia temporarily acted as the trunk location instead of China<sup>1,15,36</sup>. Our empirical findings from the COVID-19 pandemic consolidate the relationship between the global spread of influenza and changes in global human movement. While it is likely that other factors (climate, demographics, and others) play an important role in global influenza lineage dynamics, they were not the focus of our study. Nonetheless, assessing the relative contribution of each of these factors to seasonal influenza epidemics merits further investigations that might lead to improved intervention strategies and vaccine policies in the future<sup>37</sup>.

In addition to low levels of influenza incidence, substantial virus genetic bottlenecks have also been observed during the pandemic period<sup>8,38</sup>. The B/Yamagata lineage seems to have disappeared after the start of the COVID-19 pandemic and the potential underlying mechanisms for this occurrence have been widely discussed<sup>11,38</sup>. It remains unclear, however, whether B/Yamagata persists below detection levels or is entirely eliminated<sup>39</sup>. Previous studies have highlighted the interplay among population size, virus mutation, and cross-immunity in predicting the circulation of seasonal influenza, and a shift in any or multiple factors might contribute to lineage extinction<sup>32</sup>. The evolutionary and circulation dynamics of seasonal influenza viruses are maintained by a balance between the steady decrease in population susceptibility due to immunity build-up against circulating strains and the emergence of antigenically novel strains. B/Yamagata lineages were characterised by a lower  $R_e$  and lower levels of antigenic adaptation compared to B/Victoria, potentially limiting its pool of potentially newly susceptible individuals<sup>30,31</sup>. Previous work has shown that extensive genome segment reassortment between B/Victoria and B/Yamagata means that only three segments (HA, PB1, PB2) have an evolutionary history that is specific to either one lineage or the other<sup>28</sup>. If the B/Yamagata lineage has indeed disappeared, monitoring its impact on changing infection rates of B/Victoria should be a priority, as some level of cross-protection immunity is conferred between infections of influenza B viruses<sup>40</sup>.

361 We interpret our phylodynamic results in the context of several limitations. First, as discussed elsewhere, the  
362 inferred number of virus lineage movements do not capture the number of infected individuals due to  
363 incomplete sampling and uneven sequencing coverage. We therefore adopted multiple sub-sampling  
364 approaches, all of which point towards the same conclusions (**Extended Data Fig. 4, Supplementary Fig. 8**).  
365 Second, the three periods selected to perform our analysis are based on air travel data and the COVID-19  
366 stringency index, both of which might not account for all pandemic-related interventions. We therefore  
367 performed sensitivity analysis changing the cutoffs defining the third period and our conclusions remain robust  
368 to them (**Supplementary Fig. 9**). Third, even though we do not find support for variables other than air traffic  
369 in explaining dispersal of seasonal influenza, that might be due to the granularity and scale of our analysis. For  
370 example, humidity data were aggregated to macroscopic regions from grid level resolution with high  
371 heterogeneity between grids. Evidence from other studies is clear that climatic and urbanisation shape the  
372 influenza seasonal influenza transmission<sup>22</sup>. Higher resolution, open, and globally-representative virus genomes,  
373 combined with methodologies capable of accommodating tens of thousands of sequences, might address these  
374 issues in the future.

375  
376 Our study provides insights into the impact of the COVID-19 pandemic on vaccination strategies for seasonal  
377 influenza. The persistence of seasonal influenza in several regions suggests a delay in the competition among  
378 existing influenza strains and the probability of geographically structured viral strains emerging through  
379 regional diversification. This could limit universal recommendations for vaccine strain composition for the next  
380 season. Generally, seasons with extremely high incidence levels in the post-pandemic period might be  
381 associated with vaccine mismatch or the emergence of novel clusters of influenza virus<sup>41</sup>, which requires  
382 enhanced surveillance to track the novel virus strains. Except for vaccine-induced immunity, low accumulation  
383 of population immunity due to lack of natural infection might likely aggravate future influenza epidemics, as  
384 illustrated by the resurged wave in China in the winter of 2023<sup>42</sup>.

385  
386 The evolutionary and ecological dynamics of influenza globally depend on multiple complex factors, including  
387 the transmission potential of strains within locations and the connectedness between locations. The COVID-19  
388 pandemic provided a unique opportunity to evaluate the impact of NPIs on the global circulation of influenza,  
389 which has implications on the control and mitigation of future influenza epidemics and pandemics. Our study  
390 provides only a short-term, empirical evaluation of the impact of COVID-19-related NPIs, and the longer-term  
391 impact of the COVID-19 pandemic on influenza evolution and antigenicity remains unknown<sup>9,43,44</sup>. Our analysis  
392 provides a framework for evaluating the impact of pandemics on the global circulation of respiratory infectious  
393 diseases beyond SARS-CoV-2 and influenza viruses.

## 394 **Methods**

### 395 **Viral genetic sequence data**

396 We downloaded sequences of the HA segment of seasonal influenza viruses (H1N1pdm09, H3N2, B/Victoria,  
397 B/Yamagata) publicly available in GISAID<sup>19</sup> and NCBI (GenBank)<sup>45</sup> obtained from human samples on 7  
398 September 2023 (**Supplementary Fig 1**).



401 Since the genetic data of influenza B viruses deposited in GenBank is not classified into specific lineages, we  
402 initially aligned these sequences (reference genome: NC\_002207) in Mafft<sup>46</sup> and constructed a Maximum  
403 Likelihood (ML) phylogeny using FastTree v2.1.11 under a general time-reversible (GTR) substitution model  
404 to classify them into Victoria and Yamagata lineages<sup>47</sup>. For each seasonal influenza virus, we performed a  
405 sequence alignment and quality assessment using the Nextclade pipeline where we only retained genetic data  
406 with good quality defined by the quality control criteria in Nextclade<sup>48</sup>. Since the analyses would be based on  
407 the coding region of sequences, we kept the sequences with over 984 bp in coding region<sup>15</sup>. We further removed  
408 genetic data lacking complete information about collection dates or locations, and here we only focused on  
409 genetic data from geographic locations within WHO member states.

### 411 **De-duplication of genetic data**

412 Multiple specimens from a single individual patient can sometimes be uploaded to a single database;  
413 furthermore, the same sequence is sometimes uploaded to both GenBank and GISAID. We therefore  
414 implemented a de-duplication procedure applied to sequences within and between repositories. Within each  
415 repository, we identified and removed duplicates based on the same isolate names, retaining the one with the  
416 earlier collection date (with first priority) and higher genetic coverage. After this initial step, genetic sequences  
417 were queried amongst both repositories and considered as duplicates if 1) they have the same isolate names or;  
418 2) have the same sampling location (level-0 boundary, country level), collection date, and raw genetic sequence.  
419 Technically, the second rule cannot completely assert that they are duplicates, while we introduced it since the  
420 entry criteria of isolate names might vary across repositories and we aimed to minimise the likelihood of  
421 including unidentified duplicate samples. The above curation processes assembled a set of high-quality genetic  
422 dataset.

423  
424 Next, based on the spatial proximity and potential roles in disseminating influenza<sup>15</sup>, we discretised the sample  
425 collection locations by clustering them into 12 distinct geographic regions: North America (comprising Canada  
426 and the USA only), South America, Europe, Russia, Africa, West Asia, South Asia, North China, South China,  
427 Japan/Korea, Southeast Asia, and Oceania (**Supplementary Fig 2**). Sequences from Central America, Central  
428 Asia, and parts of East Asia (countries other than Japan, Korea and China) were excluded from subsequent  
429 phylogenetic and phylogeographic analyses due to limited number of available genetic data and their potentially  
430 less significant role in disseminating seasonal influenza<sup>15</sup>. Overall flowchart of collating genetic data was  
431 presented in **Supplementary Fig 1**.

### 433 **Epidemiological surveillance of seasonal influenza**

434 Weekly notified cases of seasonal influenza and specimens to be processed for influenza testing at the  
435 country/territory level were downloaded from the FluNet tool on 7 September 2023, which are provided  
436 remotely by the Global Influenza Surveillance and Response System (GISRS)<sup>16</sup>. We excluded records  
437 considered to be uninformative or unreasonable due to numerical inconsistencies (e.g., the combined total of  
438 positive influenza A, positive influenza B and negative specimens greatly exceeded (here set to 5) the total  
439 number of processed specimens, which has not been set equal given the potential co-infection of influenza A  
440 and B<sup>49</sup>), with a total of over 30,000 rows removed. We imputed the untyped, untypable or lineage-

441 undetermined samples into specific subtypes or lineages based on the available weekly- and country-specific  
442 proportion of subtypes or lineages, in which a Bayesian framework with uninformative Beta (1, 1) prior was  
443 used to calculate the posterior proportions and 95% uncertainty levels given that small tested size might cause  
444 extreme scaling.

445  
446 Subsequently, we summarised the number of specimens to be processed for influenza testing over time to  
447 reflect the intensity of virological surveillance and computed the rolling positivity rate (5-week window) of  
448 each influenza subtypes/lineages among all tested specimens on a weekly basis, with interval estimates  
449 determined by the 95% uncertainty levels for inferring the specific subtype or lineage. Intensity of genomic  
450 surveillance of influenza was indicated by the rolling percentages of reported lab-confirmed influenza cases  
451 being sequenced. To minimise the impact of heterogeneous surveillance intensity across periods, we also  
452 estimated the transmission activity level via calculating the ratio of positive influenza cases to the total number  
453 of specimens processed in each period (defined later).

### 454 **Genetic sampling and selection**

455  
456 Given that the phylodynamic inference is sensitive to sampling bias<sup>27,50,51</sup>, we carefully selected and sub-  
457 sampled genetic sequences in order to make their distributions as representative/even as possible while  
458 enhancing computational efficiency. In phylogeographic analyses, we only focused on the most recently  
459 circulating sub-clades of each seasonal influenza virus. Specifically, we chose the 6B.1A.5 sub-clade and its  
460 descendants for H1N1pdm09, 3C.2a1b sub-clade and its descendants for H3N2, V1A.3 sub-clade and its  
461 descendants for B/Victoria, and Y3 clade with M251V amino acid mutation for B/Yamagata.

462  
463 To mitigate the impact of surveillance biases, we proposed an even sampling strategy, similar to<sup>15</sup>. Briefly, we  
464 evenly subsampled the sequences across 12 geographic regions and years via precisely defining the number of  
465 sequences to be randomly subsampled per region per year (ensuring the total sub-sampled numbers of genetic  
466 sequences are about 2,000), which would ensure an equitable distribution across years and geographic regions  
467 for each influenza subtype/lineage<sup>15</sup>. Additional genetic data were randomly selected where available to ensure  
468 that there was at least one sequence sample per week throughout the evaluation period.

469  
470 Besides, we also adopted two additional sub-sampling strategies, namely, strategy accounting for temporal  
471 variation and strategy accounting for spatiotemporal variation. In both schemes, we first determined the weekly  
472 number of sequences to be subsampled at the global level in direct proportion to the product of the global  
473 positivity rate of each seasonal influenza virus and the proportion of recently circulating clades that we selected  
474 for analyses. With these weekly numbers in hand, sequences were evenly sampled across 12 geographic regions  
475 for each week for the former scheme; sequences were sampled with a weight based on the counts of  
476 subtype/lineage-specific influenza cases per geographic region per week in the latter scheme, with the  
477 guarantees of approximately 2,000 genetic sequences selected as well. For weeks with particularly low  
478 influenza positivity rates, at least 3 sequences were sampled where possible to maintain consistency in the  
479 temporal scale.

480

481 To capture more evolutionary dynamics in the past, we additionally adopted the even sub-sampling strategy to  
482 assemble a global genetic dataset with about 2,000 sequences dating back to 2011.

### 484 **Phylogenetic inference**

485 First, we constructed maximum likelihood (ML) phylogenies for the above sub-sampled genetic data using IQ-  
486 TREE v2.0.7<sup>52</sup> under the nucleotide substitution model automatically selected by ModelFinder<sup>53</sup>. The resulting  
487 phylogenetic trees were inspected with best fits in TempEst v1.5.3 to identify and remove temporal outliers<sup>54</sup>,  
488 defined as when residuals deviated by more than three standard deviations from the mean. We then inferred the  
489 time-calibrated tree using TreeTime v0.11.1<sup>55</sup>, which would serve as the starting tree for the Bayesian  
490 phylogenetic inference.

491  
492 Phylogenetic trees were inferred for H1N1pdm09, H3N2, B/Victoria and B/Yamagata in Bayesian framework  
493 using BEAST v1.10.4<sup>56</sup>, in which we incorporated a starting ML tree, a SRD06 nucleotide substitution model<sup>57</sup>,  
494 a Bayesian SkyGrid coalescent prior (with grid points equidistantly spaced in six month intervals)<sup>58</sup>, and a strict  
495 molecular clock model with a lognormal distribution prior. Markov Chain Monte Carlo (MCMC) was run in  
496 parallel for 2 independent chains, with a total of about 250 million steps sampled every 50,000 steps for each  
497 chain. Steps were combined across two chains with the first 10% discarded as burn-in. MCMC convergence  
498 was checked in Tracer v.1.7.1<sup>59</sup> and effective sample sizes (ESS) for all continuous parameters are over 100.  
499 We resampled states every 400,000 steps, which yields a total of approximately 1000 empirical trees for each  
500 influenza subtype/lineage under each sub-sampling strategy.

### 502 **Time-inhomogeneous phylogeographic reconstruction**

503 We used the empirical tree distributions to further perform the phylogeographic reconstruction under the  
504 generalised linear model (GLM) framework<sup>1</sup>. The default model assumption with constant-through-time rate of  
505 viral geographic dispersal along the phylogeny might not fit the scenario where the adoption of NPIs against the  
506 COVID-19 pandemic may alter the transition rate of other respiratory infectious diseases. Therefore, we  
507 adopted a time-inhomogeneous GLM model to allow for incorporating interval-specific predictors and  
508 accounting for the potential variation in rate of influenza dispersal before, during, and after the NPIs-intensive  
509 phase of COVID-19 pandemic<sup>25</sup>. The cutoff points that defined three phases were 1) 31 January 2020, in which  
510 the global COVID-19 stringency index increased rapidly and global air traffic volume started to decline, and 2)  
511 31 July 2021, when the global COVID-19 stringency index gradually declined, global air traffic volume started  
512 to resume, and the positivity rate of seasonal influenza started to increase (**Fig 1, Extended Data Fig. 1**).

513  
514 Specifically, we first adopted a three-period GLM-diffusion phylogeographic model with interval-specific  
515 indicator variables to represent the inclusion or exclusion of predictors<sup>25</sup>. Predictor inclusion was further pooled  
516 across intervals using hierarchical graph modelling to allow for including covariates at the hierarchical level<sup>60</sup>.  
517 Hierarchical and interval-specific indicators were estimated under spike-and-slab procedure<sup>60</sup>. Here, multiple  
518 categories of potential predictors of spatial spread of influenza (e.g., demographic, meteorological, air passenger  
519 traffic, geographic, and sampling factors) were included in the GLM model (**Supplementary Fig 3-5,**  
520 **Supplementary Table 1-3**). Among that, air traffic data were provided by the Official Airline Guide (OAG),

521 with details in the **Appendix**. Notably, we only adopted a time-homogeneous (1-period) model for B/Yamagata  
522 given the limited sequences sampled after the onset of COVID-19 pandemic.

523  
524 Given that air traffic between regions is able to significantly predict the spatial spread of influenza indicated by  
525 the above analyses (**Fig. 2g**), we subsequently specified a three-period GLM model with air traffic data as sole  
526 predictor for the relative rates and extended it to also include overall air traffic as a predictor for the overall  
527 transition rate scalar. Specifically, we incorporated the log-transformed and standardised average volume of air  
528 traffic in each period as a predictor for the overall average migration rate across three periods. In addition, we  
529 included the asymmetric air traffic matrix between regions as the predictor for relative transition rates between  
530 each pair of regions. Therefore, both the relative and average migration rate are able to vary across the three  
531 periods, exactly rationalising the potential impact of COVID-19 pandemic in spatial transmission of influenza.  
532 To detect potential deviations in the predictive power of air mobility for specific transition rates, time-  
533 homogeneous random effects were added to the parameterization of phylogeographical transition rate<sup>25</sup>. For  
534 each influenza subtypes/lineages, a total of less than 6 random effects of transition rate with their 95% highest  
535 posterior density (HPD) intervals deviated zero, indicating a good predictive ability (**Supplementary Fig 12**).  
536 The complete Markov jump history through time was also inferred under this model. A total of 10 million steps  
537 were run for at least one chain and sampled every 5,000 steps in GLM phylogeographic models.  
538

### 539 **Summary of posterior trees**

540 First, we summarised the trunk location through time based on the phylogeographic estimates using PACT  
541 v.0.9.5 (<https://github.com/trvrb/PACT>)<sup>15,36</sup>, where the trunk is defined as all branches ancestral to viruses  
542 sampled within 1 year of the most recent sample. Second, we adopted the TreeMarkovJumpHistoryAnalyzer  
543 tool to obtain the posterior summaries of Markov jumps and their timings. Upon this, we inferred the patterns of  
544 transition flow and mapped the migration dynamic across the three periods, in which we also calculated the net  
545 export during each period. To account for the heterogeneity of lifting time of NPIs across regions, we further  
546 adopted the region-specific cutoffs to define the third period based on the region-specific recovery of air traffic  
547 (**Fig. 2d**), where 1 December 2021 was used for South Asia; 1 July 2022 for Japan/Korea, Oceania, and  
548 Southeast Asia; and 1 December 2022 for China. Third, two metrics of viral persistence were inferred: 1) tip-  
549 associated persistence, measured as the time for tips to leave its sampling location walking backwards in time  
550 across the trees using PACT v.0.9.5; 2) lineage-associated persistence, measured as the mean time for lineages  
551 circulating along phylogenetic branches at a given evaluation time to leave current geographic location through  
552 walking backwards across the trees using the PersistenceSummarizer tool. Here, we combined South China and  
553 North China together to estimate the persistence in China. Fourth, we estimated the time to the most recent  
554 common ancestor of tips circulating per season per hemisphere across trees using the reassembled genetic  
555 dataset, as a proxy of lineage turnover. Fifth, mean pairwise diversity (or genealogical diversity) through time  
556 was estimated by averaging the pairwise distance in time between each pair of tips with a 1-month window  
557 across trees using PACT v.0.9.5.  
558

## 559 Selection pressure

560 Selection pressures for the HA segment of each influenza subtypes or lineages were inferred as the ratio of the  
561 number of nonsynonymous substitutions per nonsynonymous site ( $d_N$ ) to the number of synonymous  
562 substitutions per synonymous site ( $d_S$ ) using the methods of Single Likelihood Ancestor Counting (SLAC)<sup>61</sup> and  
563 Fast Unconstrained Bayesian AppRoximation (FUBAR)<sup>62</sup> in the HyPhy package<sup>63</sup>. Amino acid sites were  
564 considered to be under positive or negative selection if they were selected by the two methods, where  $p$ -value  
565 threshold of 0.1 in SLAC and posterior probability of 0.8 in FUBAR were used to identify those sites under  
566 selection.

## 568 Bayesian hierarchical regression model

569 In what follows, we explore the potential drivers of dynamic patterns of lineage-associated persistence over  
570 time. Previous work indicates that local persistence of influenza virus is associated with antigenic drift and  
571 seasonality<sup>15</sup>, from which we further hypothesise that NPIs adopted during the pandemic, in particular the  
572 reduction of inter-region air traffic arrivals, might contribute to persistence. Here, we constructed a Bayesian  
573 hierarchical regression model to model the association of antigenic drift ( $w$ ) and air traffic arrival reductions ( $x$ )  
574 with lineage-associated persistence ( $y$ ) (here measured in the units of years and changed every month) while  
575 accounting for regions and months (conceptual details presented in **Supplementary Fig 13**).

## 577 Standardisation of variables

578 We first use genetic data to measure cross-immunity to indicate the extent of antigenic drift<sup>26,64</sup>. Briefly, for  
579 each virus strain  $i$  in a three-month time window (e.g., from Jan 2020 to Mar 2020), we limited pairwise  
580 comparisons to sub-sampled global strains  $j$  circulating within the last six months (e.g., from Jul 2019 to Dec  
581 2019) from the current three-month time window (**Supplementary Fig 14**). We counted the number of amino  
582 acid differences between the HA segments at 49 epitope sites for each pair of strains in adjacent time  
583 windows<sup>26</sup>. Then we estimated the ability of strain  $i$  to escape immunity by summing the mean exponentially-  
584 scaled epitope distances between the given strain ( $i$ ) and previously circulating strains ( $j$ ) using<sup>26</sup>:

$$585 \quad w_i(t) = \sum_{j: t_j < t_i} f_j \left( 1 - \exp\left(-\frac{D_{i,j}(a_i, a_j)}{D_0}\right) \right)$$

586 Where  $i$  is the given strain in the current three-month time window ( $t_i$ , e.g., from Jan 2020 to Mar 2020),  $j$  are  
587 the strains circulating in the previous six-month time window ( $t_j$ , e.g., from Jul 2019 to Dec 2020),  $f_j$  is the  
588 strain frequency in the previous time window,  $D_{i,j}$  is the epitope distances between strain  $i$  and strain  $j$ , and  $D_0$  is  
589 the constant (set as 14)<sup>26</sup>. Since each virus strain  $i$  was associated with a region  $r$  and a three-month period  $m$ ,  
590 we summarised the average value ( $w_{r,m}$ ) by region and three-month time window. We then standardised these  
591 region- and month-specific antigenic drift  $w_{r,m}$  as follows:

$$592 \quad w_{r,m}^z = \frac{w_{r,m} - \bar{w}_{r,m}}{SD(w_{r,m})}$$

Where  $w_{r,m}$  is the antigenic drift of strains circulating in region  $r$  in month  $m$  (constant through three months, e.g.,  $w_{r,Jan} = w_{r,Feb} = w_{r,Mar}$ ), and  $w_{r,m}^z$  is the z-score of standardised  $w_{r,m}$ , namely  $w_{r,m}$  minus its mean ( $\bar{w}_{r,m}$ ) divided by its standard deviation (SD).

For each month  $m$  in region  $r$ , we calculated  $x_{r,m}$ , defined as the relative reduction of inter-region air traffic arrivals ( $A_{r,m}$ ) compared to the monthly maximum:

$$x_{r,m} = 1 - \frac{A_{r,m}}{\max(A_{r,m})}$$

And we then computed the standardised z-score  $x_{r,m}^z$ :

$$x_{r,m}^z = \frac{x_{r,m} - \bar{x}_{r,m}}{SD(x_{r,m})}$$

We also standardised the persistence ( $y_{r,m}$ ) as the outcome/dependent variable:

$$y_{r,m}^z = \frac{y_{r,m} - \bar{y}_{r,m}}{SD(y_{r,m})}$$

Where  $y_{r,m}$  is the lineage-associated persistence of viruses circulating in region  $r$  in month  $m$  (evaluated as the midpoint of each month), and  $y_{r,m}^z$  is the z-score of standardised  $y_{r,m}$ .

### **Regression model**

Afterwards, we model the association of standardised antigenic drift ( $w_{r,m}^z$ ) and standardised air traffic reduction ( $x_{r,m}^z$ ) with standardised persistence ( $y_{r,m}^z$ ) in a Bayesian hierarchical model. According to the directed acyclic graph (DAG) framework we assumed (**Supplementary Fig 13**), we first predicted antigenic drift as normally-distributed observations with mean  $\gamma$  that is a linear function of one predictor variable  $x_{r,m}^z$ :

$$w_{r,m}^z \sim \text{Normal}(\gamma, \varepsilon)$$

$$\gamma = a + cx_{r,m}^z$$

$$\varepsilon \sim \text{HalfNormal}(scale=1)$$

Where  $a$  is the intercept,  $c$  is the coefficient for covariate  $x_{r,m}^z$ , while  $\varepsilon$  represents a half-normal-distributed observation error.

We then predicted persistence as Gaussian-distributed observations with mean  $\mu$  that is a linear function of two predictor variables,  $w_{r,m}^z$  and  $x_{r,m}^z$ :

$$y_{r,m}^z \sim \text{Gaussian}(\mu, \sigma)$$

$$\mu = a + bw_{r,m}^z + cx_{r,m}^z$$

$$\sigma \sim \text{HalfNormal}(scale=1)$$

Where  $a$  is the intercept,  $b$  is the coefficient for covariate  $w_{r,m}^z$ , and  $c$  is the coefficient for covariate  $x_{r,m}^z$ , while  $\sigma$  represents a half-normal-distributed observation error. This linear sub-model is linked to the previous one via  $a$  and  $c$  parameters.

Since we are constructing a Bayesian model, we should assign prior distributions to the unknown  $a$ ,  $b$ , and  $c$ . To facilitate MCMC sampling, we structured these parameters ( $a$ ,  $b$ , and  $c$ , same as described above) in a non-centered parametrisation. We use a half-normal distribution (normal distribution folded at zero) as the prior for scale parameters ( $a_s$ ,  $b_s$ ,  $c_s$ ), and standard Normal priors (i.e. mean = 0, sd = 1) for location parameters ( $a_l$ ,  $b_l$ ,  $c_l$ ) and standard Normal distributions for base distributions ( $a_z$ ,  $b_z$ ,  $c_z$ ) with two dimensions: region and month. The non-centered Normal distributions are then derived as the location plus the product of the scale and base distribution (e.g.,  $a_l + a_s a_z$ ):

$$a = a_l + a_s a_z$$

$$b = b_l + b_s b_z[\text{region, month}]$$

$$c = c_l + c_s c_z[\text{region, month}]$$

$$a_s, b_s, c_s \sim \text{HalfNormal}(scale=1)$$

$$a_l, b_l, c_l \sim \text{Normal}(\mu=0, \sigma=1)$$

$$a_z, b_z, c_z \sim \text{Normal}(\mu=0, \sigma=1)$$

We performed the analyses focusing on the H3N2 virus subtypes circulating in Africa, South Asia, and Southeast Asia. This selection was motivated by the occurrence of local H3N2 epidemic waves in these regions during the NPIs-intensive phase of COVID-19 pandemic (**Fig. 2f**). This allows for estimating the lineage-associated persistence through time because more genetic data is available in the second period.

The model was implemented and sampled with PyMC v.5<sup>65</sup> using a Hamiltonian Monte Carlo (HMC) No-U-Turn Sampler (NUTS) with four parallel chains of 2,000 tuning steps, 2,000 samples, and a target acceptance probability of 0.99. The chains mixed well with all bulk effective sample size (ESS) > 1000, all Gelman-Rubin convergence diagnostic  $\hat{R} = 1$ , and all Bayesian Fractions of Missing Information (BFMIs)  $\geq 0.75$ .

## Data and code availability

Genetic sequences used were available in NCBI (<https://www.ncbi.nlm.nih.gov/labs/virus/vssi/#/>) and GISAID (<https://www.gisaid.org/>). Influenza virological surveillance data were available from the FluNet (<https://www.who.int/tools/flunet>). The origin-destination passenger air traffic data up to July 2023 were provided by Official Airline Guide (OAG) Ltd. (<https://www.oag.com/>) through a data sharing agreement. The codes and accession IDs of sequences used to run the phylogenetic analysis are available here: [https://github.com/zychenfd/global\\_influenza\\_project](https://github.com/zychenfd/global_influenza_project).

659

## 660 **Acknowledgements**

661 We gratefully acknowledge all data contributors, i.e., the Authors and their Originating laboratories responsible  
662 for obtaining the specimens, and their Submitting laboratories for generating the genetic sequence and metadata  
663 and sharing via the GISAID Initiative and NCBI, on which this research is based. The acknowledgment table of  
664 genetic data used is provided on our GitHub repository. We thank Dr. William Wint and Dr. John Brittain for  
665 valuable discussions. H.Y. acknowledges financial support from the Key Program of the National Natural  
666 Science Foundation of China (No. 82130093) and the General Program of the National Natural Science  
667 Foundation of China (No. 82073613). M.U.G.K. acknowledges funding from The Rockefeller Foundation,  
668 Google.org, the Oxford Martin School Pandemic Genomics programme (also O.G.P.), European Union Horizon  
669 2020 project MOOD (#874850), The John Fell Fund, a Branco Weiss Fellowship and Wellcome Trust grants  
670 225288/Z/22/Z and 226052/Z/22/Z. P.L. acknowledges support from the European Research Council (grant  
671 agreement no. 725422 – ReservoirDOCS). J.C. acknowledges financial support from the Young Scientists Fund  
672 of the National Natural Science Foundation of China (No. 82304199).

673

## 674 **Author contributions**

675 M.U.G.K. and H.Y. conceived and planned the research. Z.C., M.U.G.K., P.L., and S.B.M. analysed the data.  
676 J.L.H.T., B.G., L.D.P., X.D., J.C., S.B., M.A.S., O.G.P., P.L., M.U.G.K. and H.Y. advised on methodologies.  
677 Z.C. and M.U.G.K. wrote the initial manuscript draft. All authors edited, read, and approved the manuscript.

678

## 679 **Competing interests**

680 H.Y. received research funding from Sanofi Pasteur, GlaxoSmithKline, Yichang HEC Changjiang, Shanghai  
681 Roche Pharmaceutical Company, and SINOVAC Biotech Ltd. None of these funds are related to this work. All  
682 other authors declare no competing interests.

683



684

## Extended Data

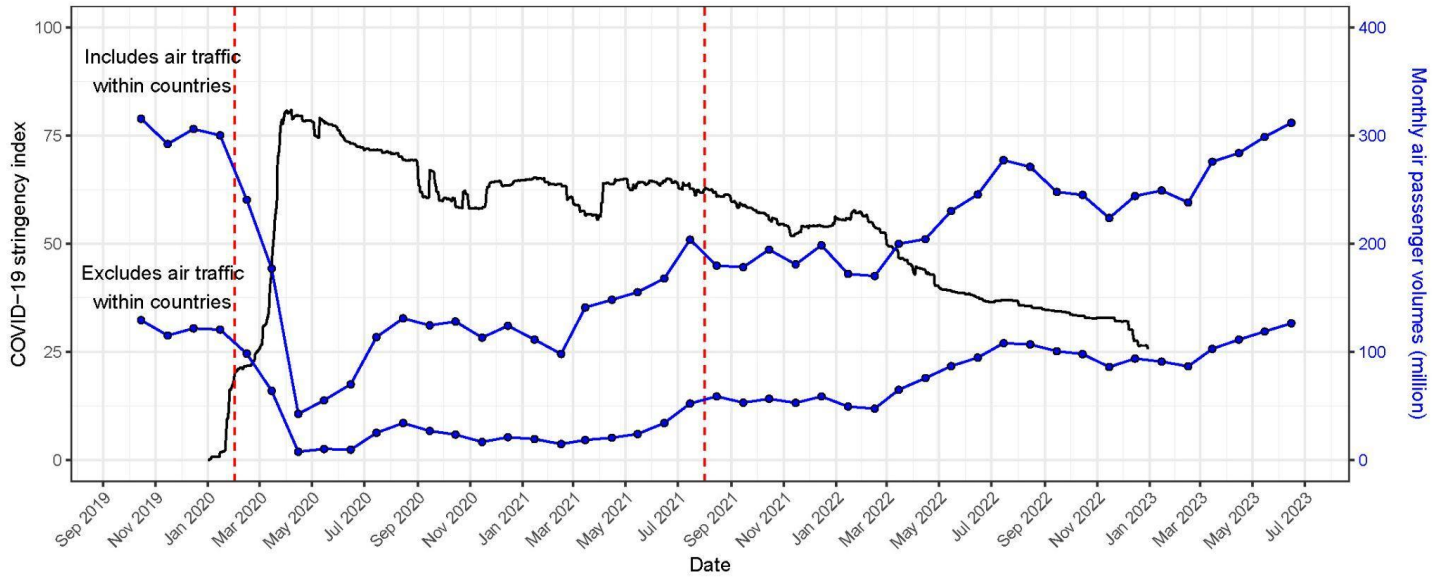

685

686

*Extended Data Fig. 1 | The Global COVID-19 stringency index and monthly air passenger volumes over time.*

687

688

*Data for the stringency index were derived from Our World in Data<sup>66,67</sup>, which was weighted by country-level population size to calculate the global index.*

689

690

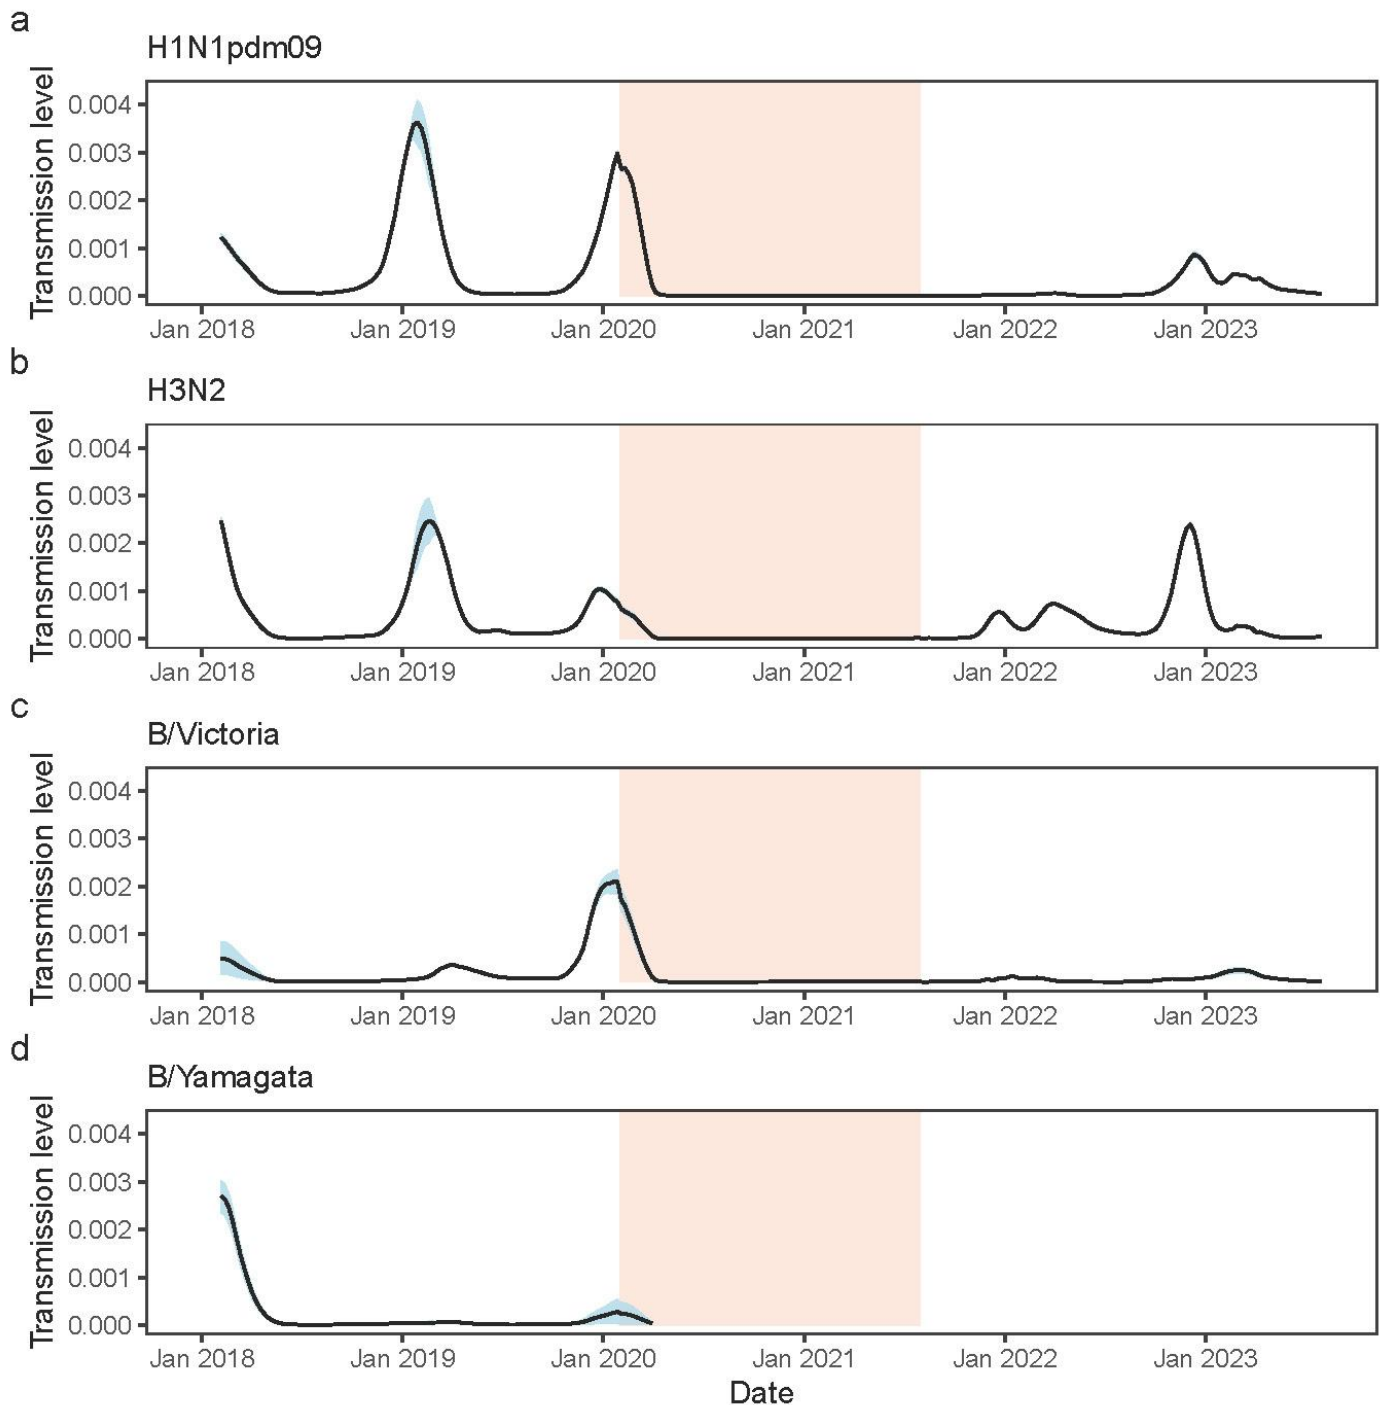

691

692

693

*Extended Data Fig. 2 | Transmission activity level of seasonal influenza virus accounting for the variations in surveillance intensity across periods.*

694

*To minimise the impact of variations on surveillance intensity across periods, we estimated the transmission activity level via calculating the ratio of positive influenza cases to the total number of specimens processed in each period. The estimates of absolute numbers are not meaningful, while comparisons over time can be used for the signal of changes in transmission level. The light orange shadow area represents the NPIs-intensive phase of the COVID-19 pandemic (second period), defined as spanning from 1 February 2020 to 31 July 2021.*

698

699

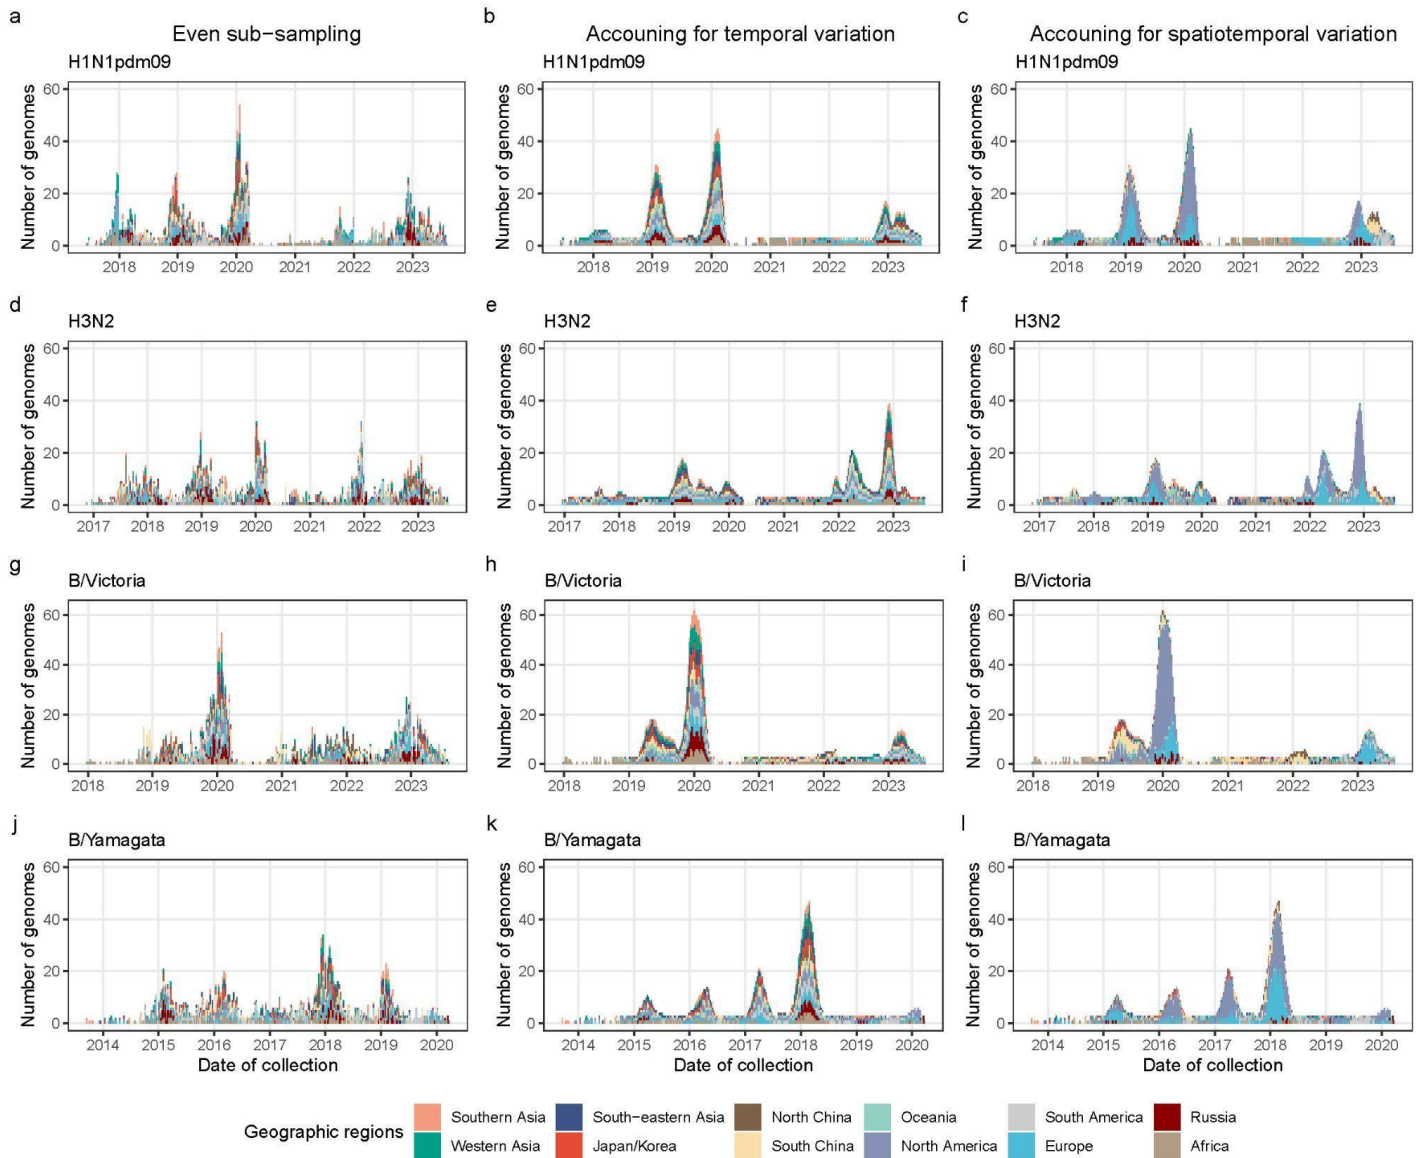

700

701

702

703

*Extended Data Fig. 3 | Spatiotemporal distribution of approximately 2,000 genetic data for each influenza subtype/lineage subsampled through three sub-sampling schemes.*

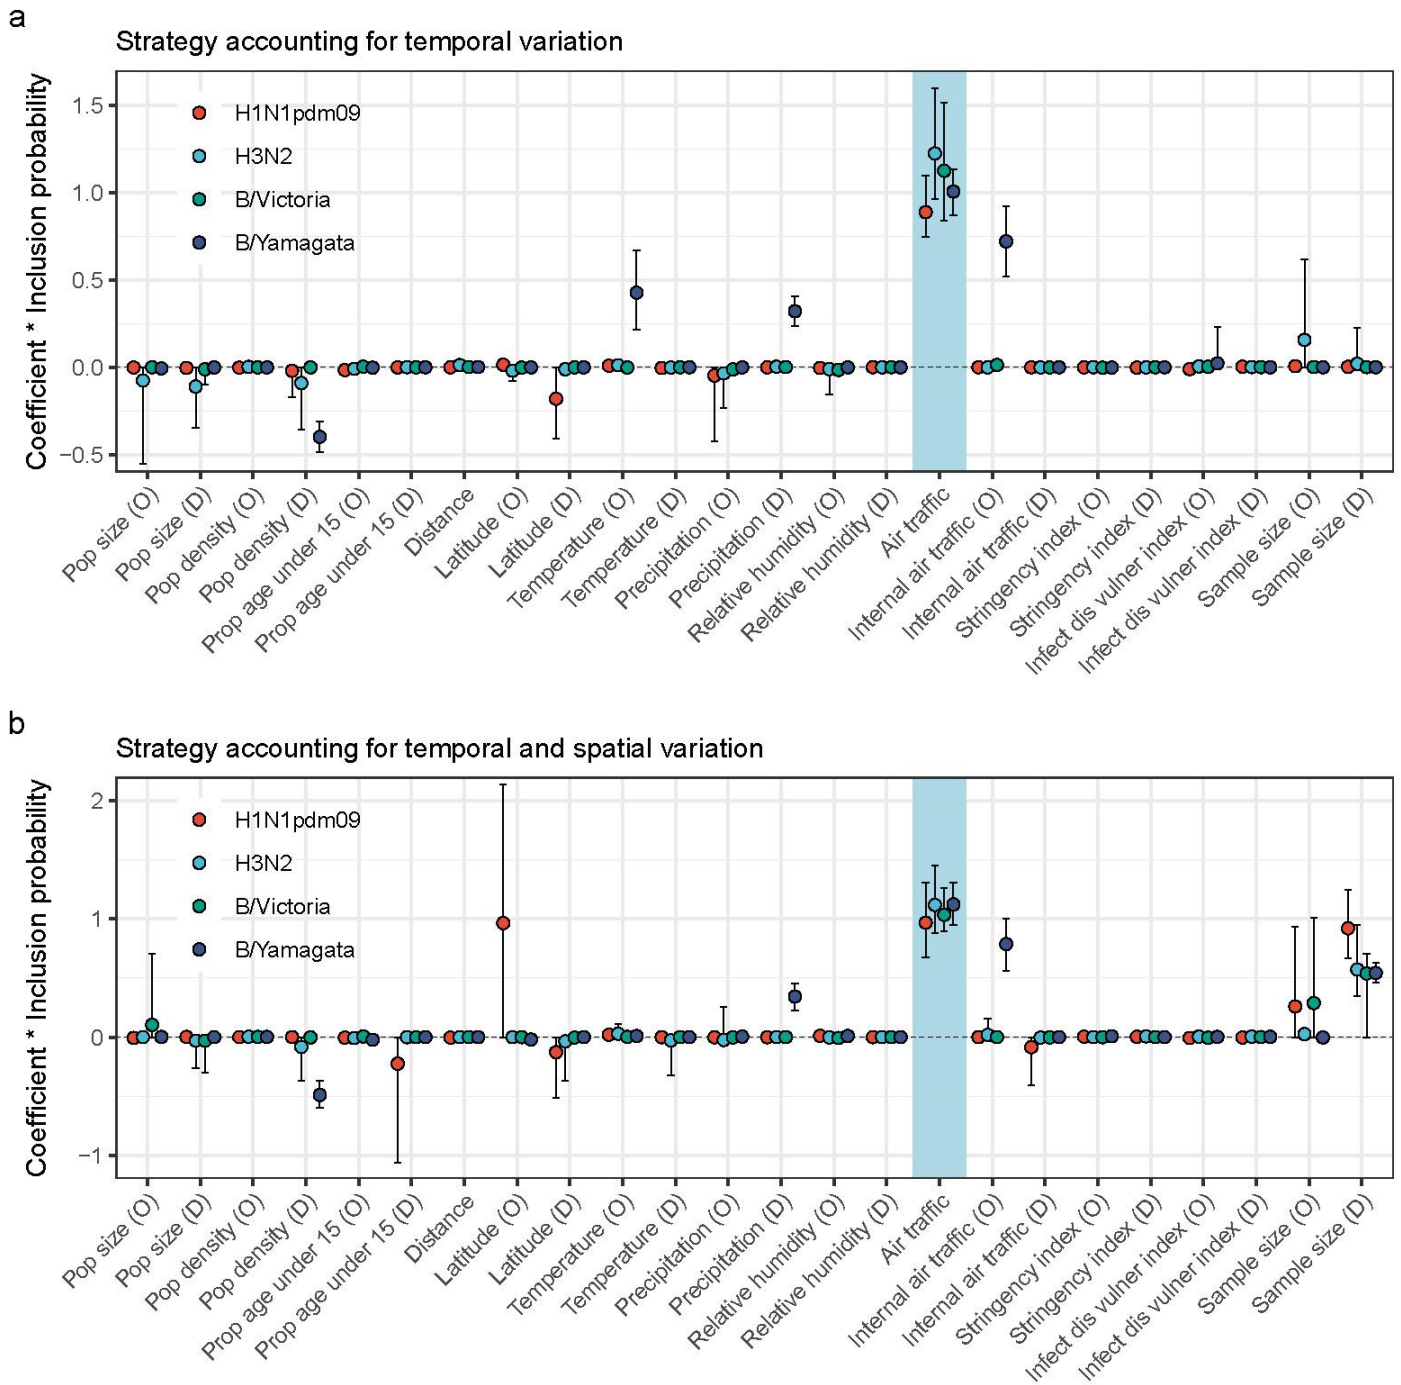

704

705

*Extended Data Fig. 4 | Predictors of global movements of seasonal influenza virus using 3-period GLM model under various sub-sampling strategies.*

706

707

*Analyses for B/Yamagata virus were performed under a time-homogeneous (1-period) GLM model since few genetic data available after March 2020. Points and ranges represent the posterior mean and 95% highest posterior density (HPD) intervals, respectively.*

708

709

710

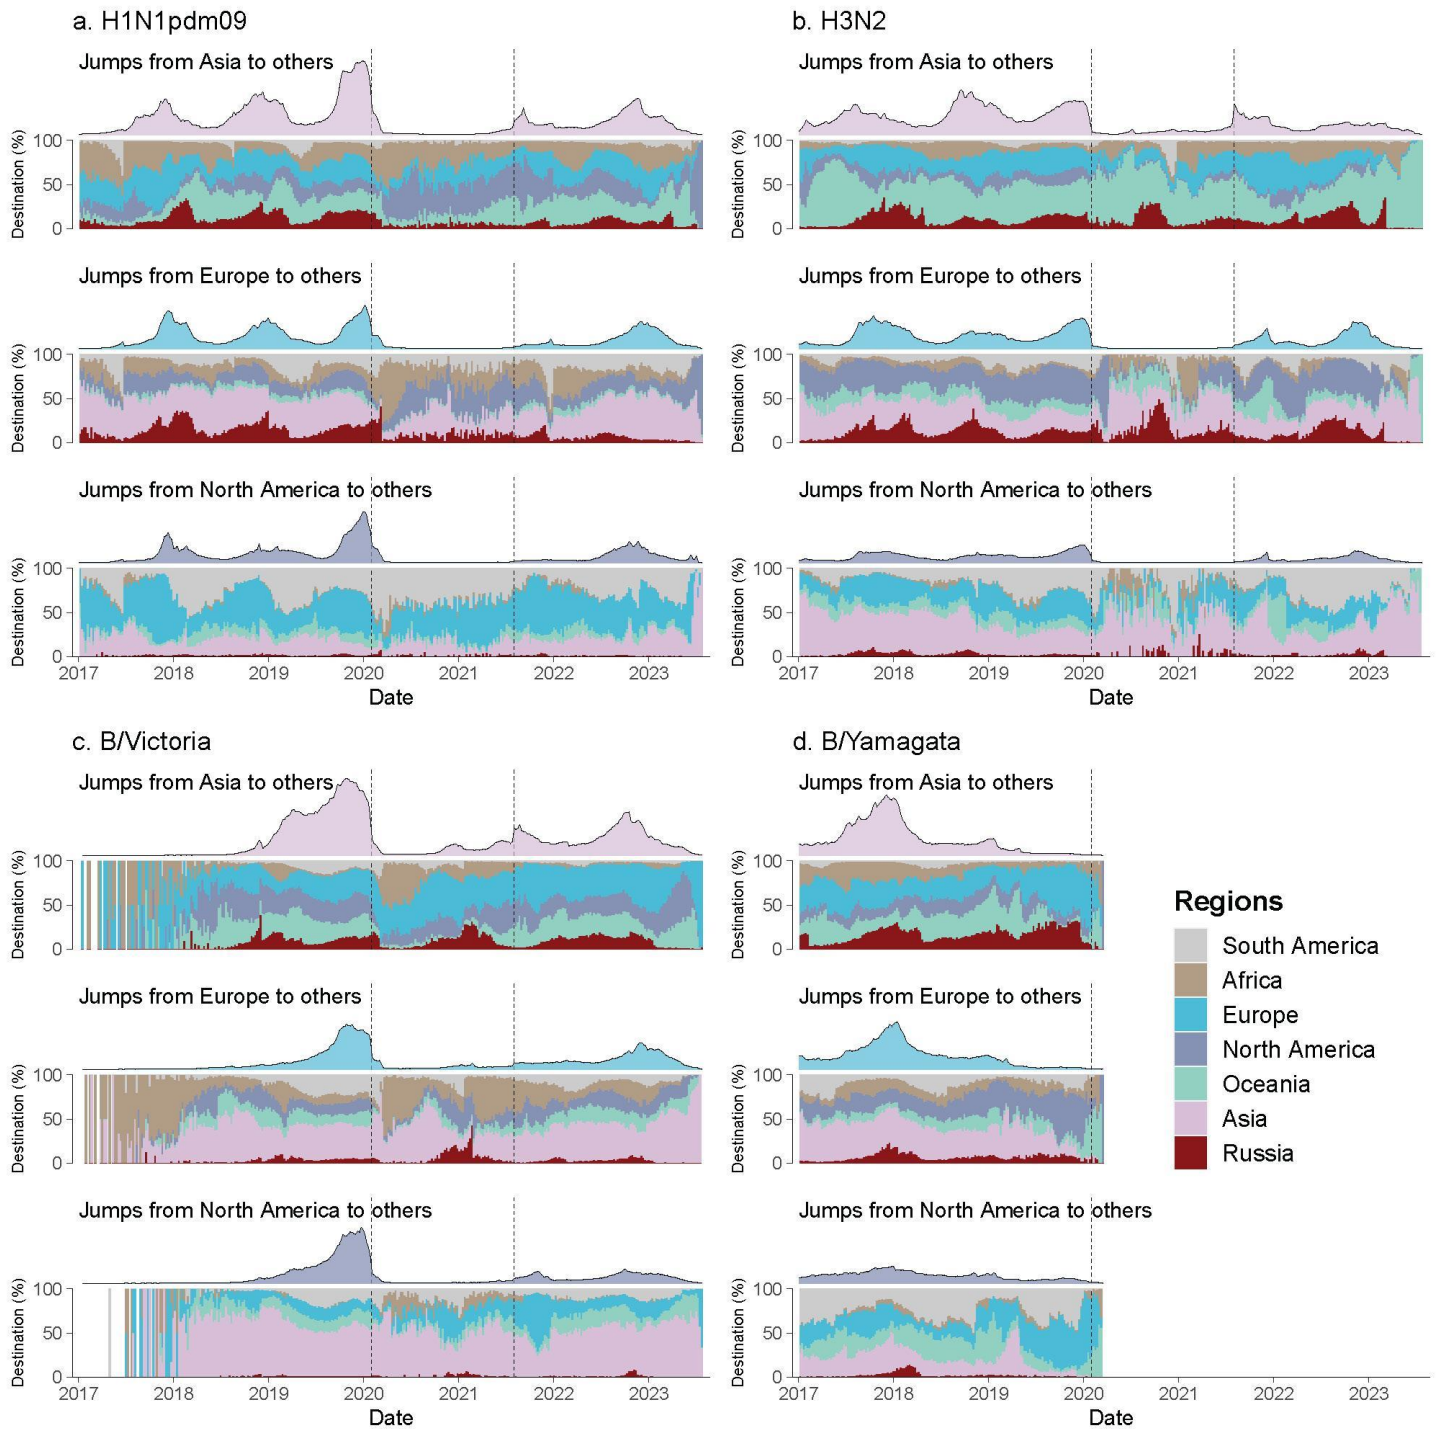

711

712

713

**Extended Data Fig. 5 | Posterior estimates of weekly counts of location transition from specific regions over time.**

714

The curve represents the counts of Markov jumps from each region to other regions over weeks, which was comparable within and across panels. The proportion below was the proportion of destinations of the Markov jumps from specific regions. Notably, proportion was unavailable in some weeks without Markov jump events, and unstable in weeks with few Markov jump events especially during the NPIs-intensive phase of the pandemic. The dashed lines refer to the cutoff points that define the three periods.

719

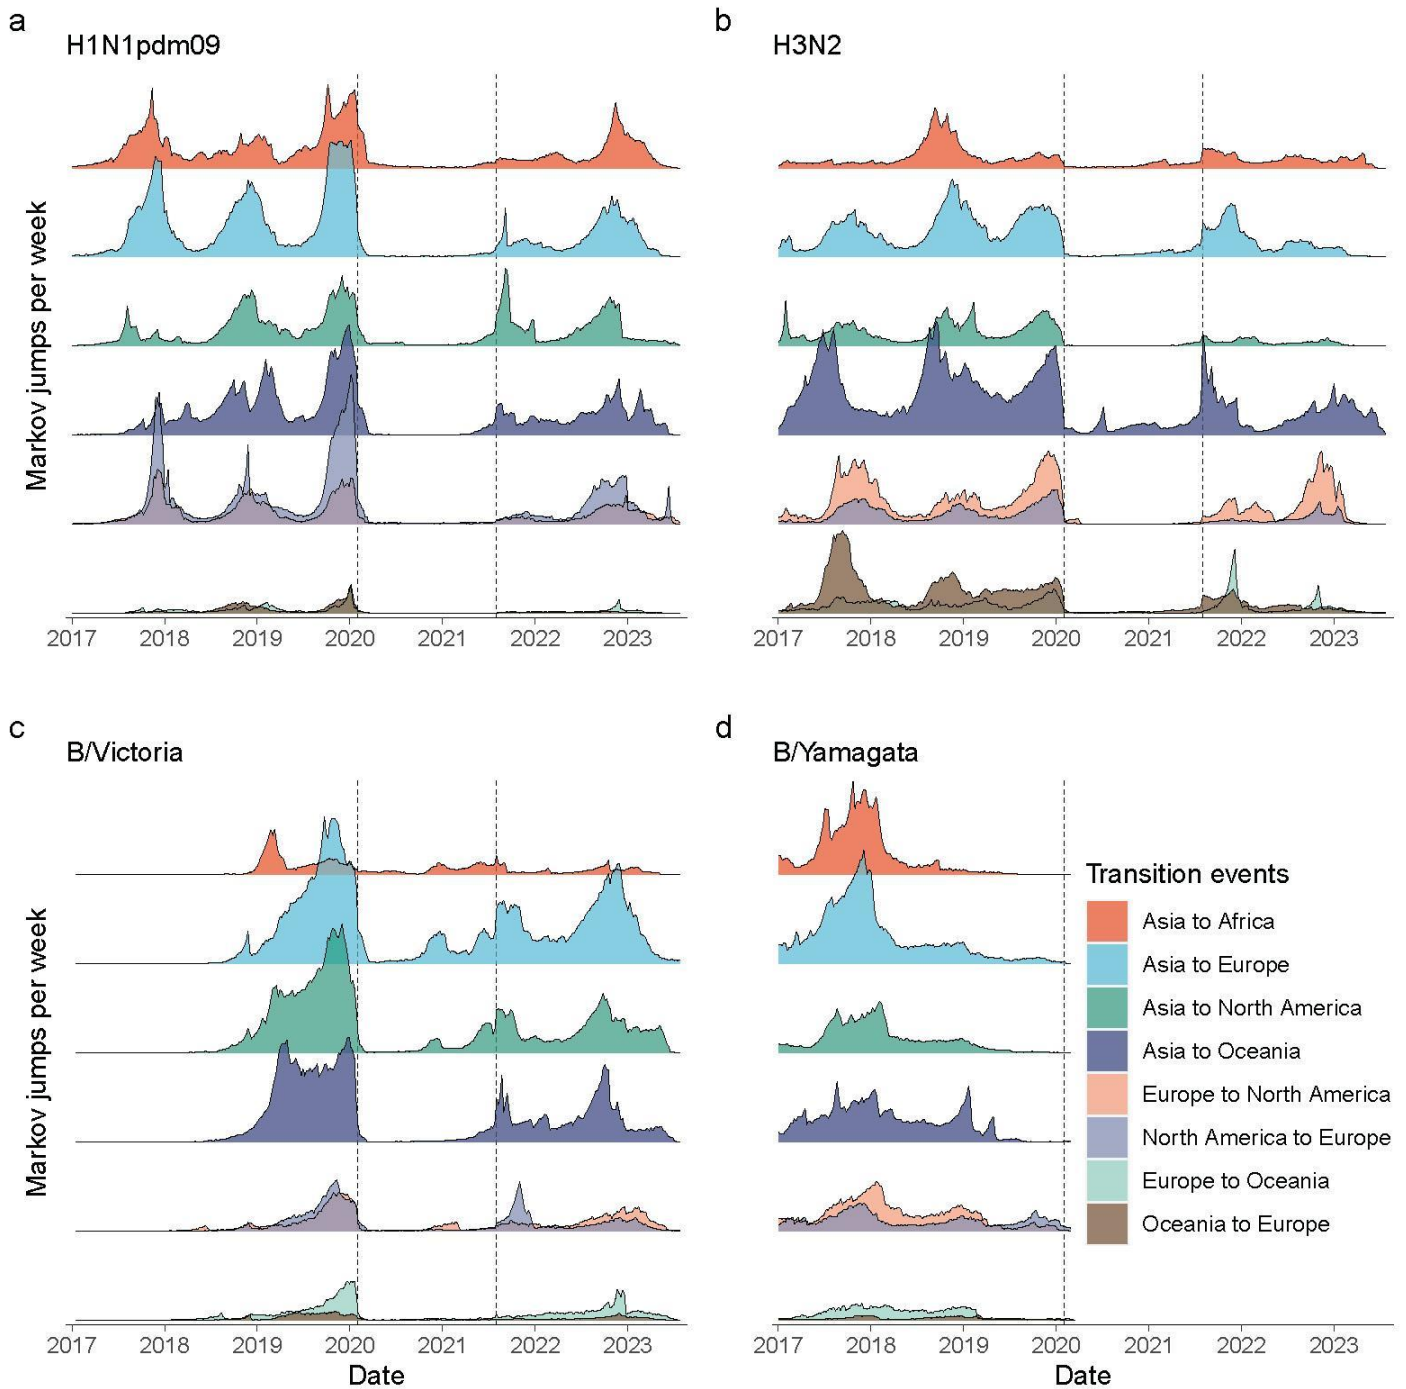

720

721

*Extended Data Fig. 6 | Posterior estimates of weekly counts of location transition between regions over time.*

722

*The density of Markov jumps was comparable within and across panels. The dashed lines refer to the cutoff*

723

*points that define the three periods.*

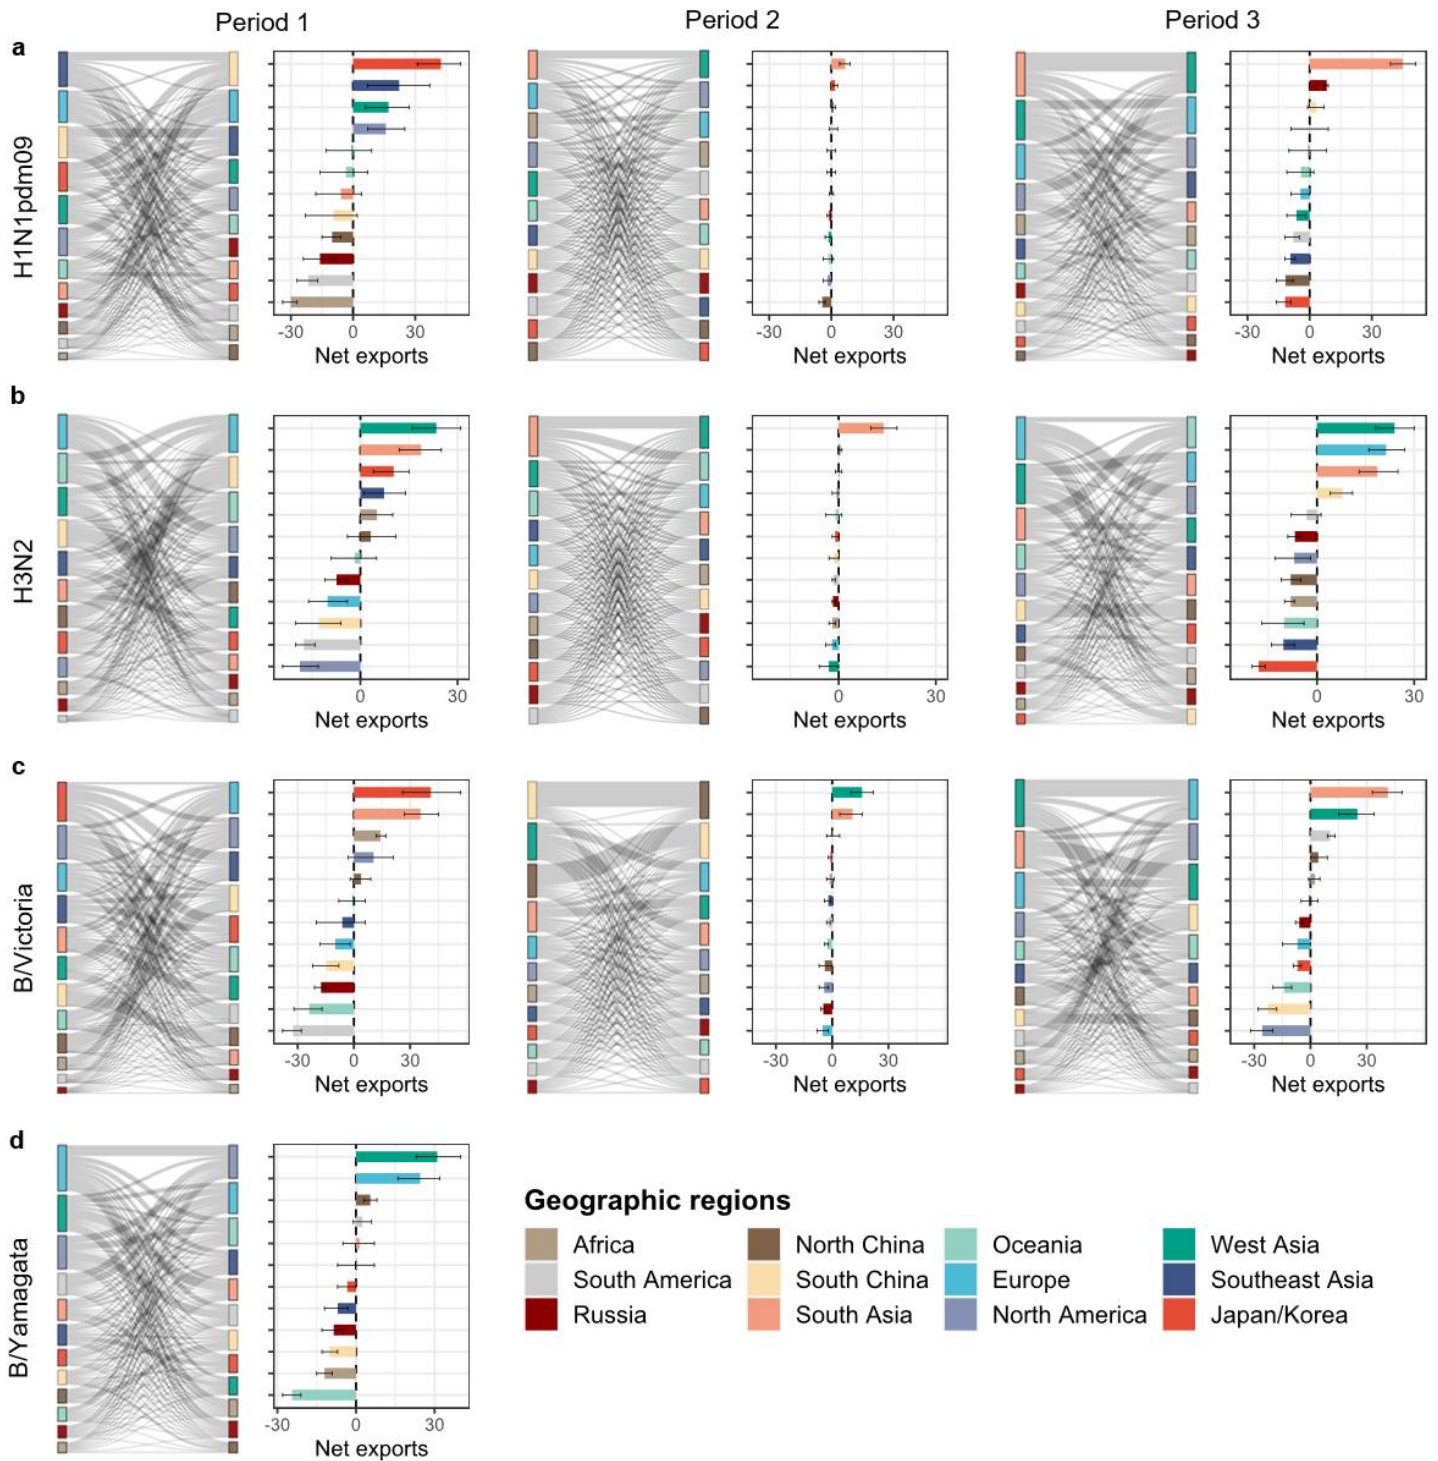

724

725

**Extended Data Fig. 7 | The period-specific net export dynamic of seasonal influenza.**

726

Here the first period is defined as periods from February 2018 to January 2020 (24 months); the second period ranges from February 2020 to July 2021 (18 months); and the third period is from August 2021 to July 2023 (24 months). Analyses are based on the posterior summaries of the Markov jumps under a time-inhomogeneous (3-period) GLM model with only air traffic data as the predictor of overall and relative transition rates, except for B/Yamagata under a time-homogeneous (1-period) GLM model. Error bars in the bar charts represent the interquartile range.

727

728

729

730

731

732

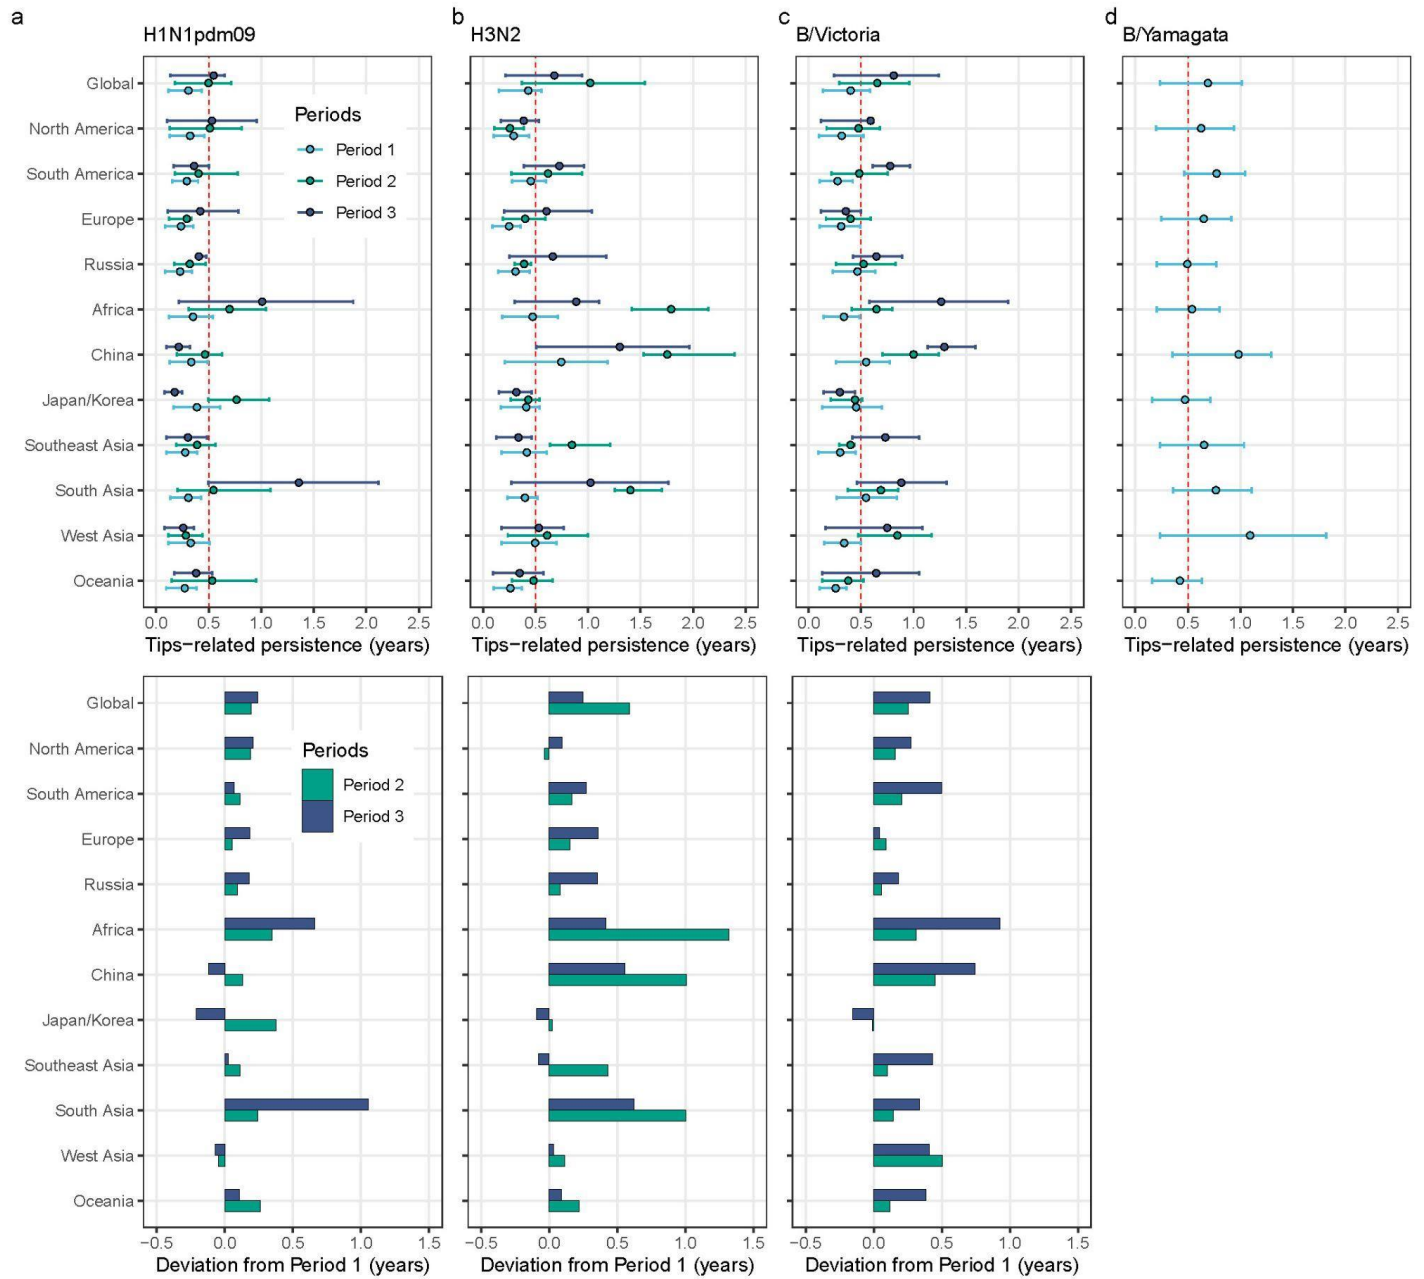

733

734

**Extended Data Fig. 8 | Tip-related persistence across three periods.**

735

**a-d**, The persistence of tips for **a**) H1N1pdm09, **b**) H3N2, **c**) B/Victoria across three periods, and **d**)

736

B/Yamagata in the first period. At the bottom panels, we presented the persistence deviations from Period 1.

737

Here we combined North China and South China together to estimate the persistence in China. Tip-associated

738

persistence represents the time for tips to leave its current sampling location through walking backwards up the

739

phylogeny. Points refer to mean persistence and lines represent the interquartile range.

740



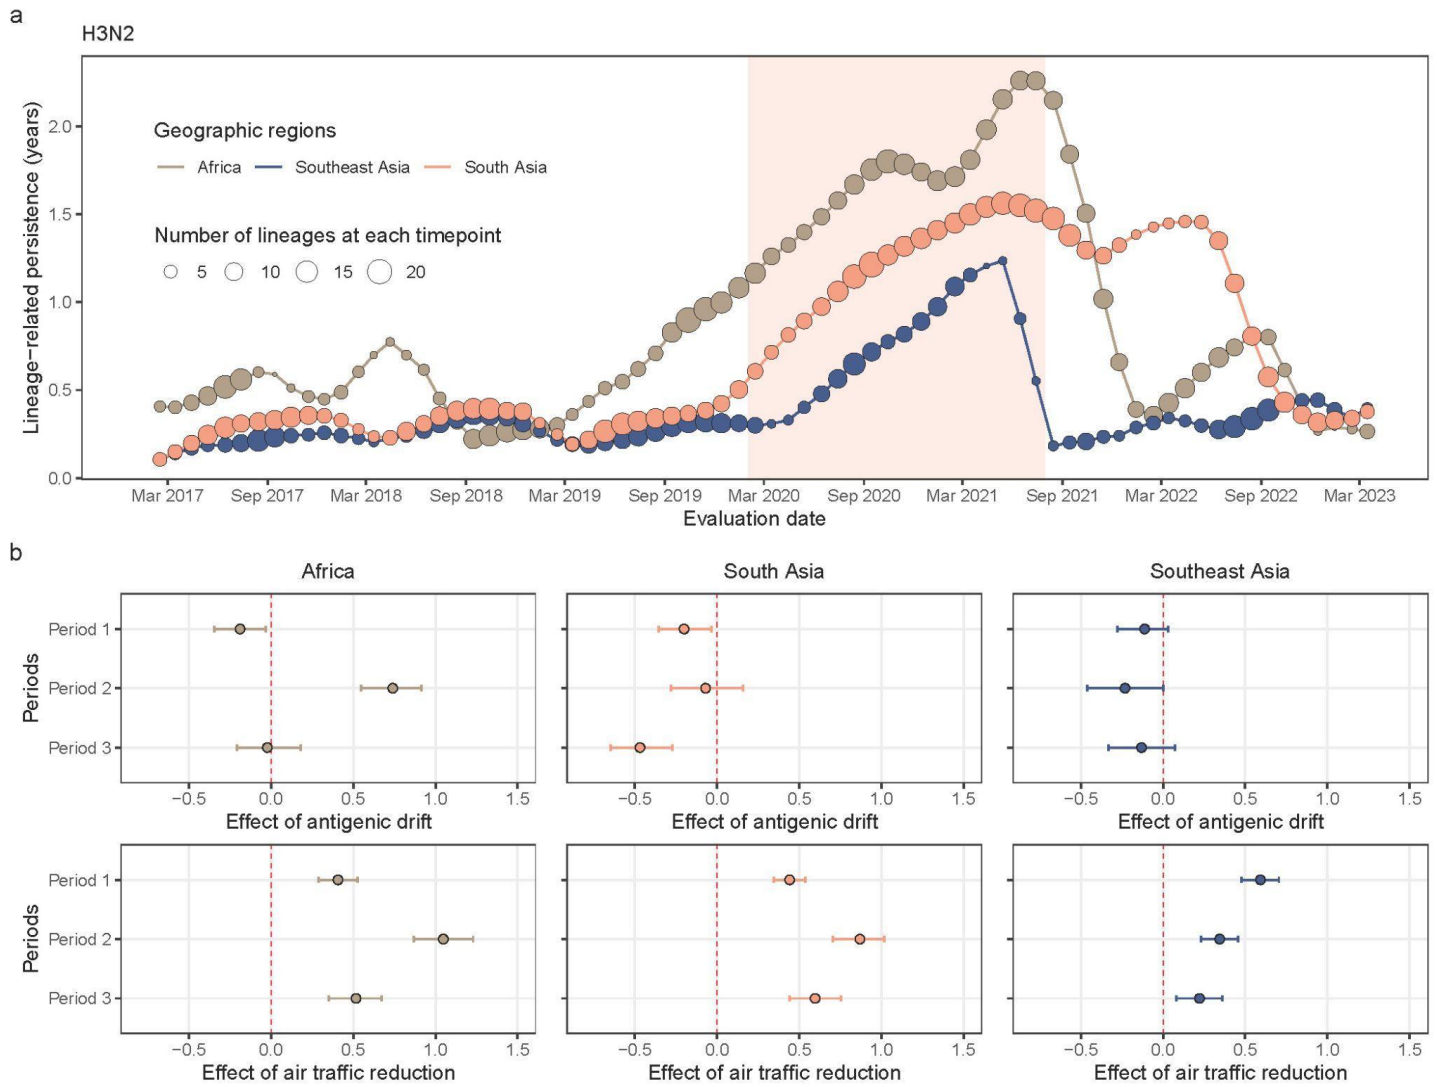

**Extended Data Fig. 9 | Lineage-related persistence of H3N2 in Africa, Southeast Asia, and South Asia.**

**a**, The temporal patterns of lineage-associated persistence of H3N2 virus subtypes circulating along the branch at various evaluation times in Africa, Southeast Asia and South Asia. Lineage-associated persistence refers to the mean time for lineages circulating along phylogenetic branches at a given evaluation time to leave current geographic location. **b**, The effect (z-score) of antigenic drift and inter-region air traffic reduction on lineage-associated persistence of H3N2 virus circulating in Africa, Southeast Asia and South Asia in each period, respectively. Points refer to mean estimates and lines represent the 90% highest density intervals.

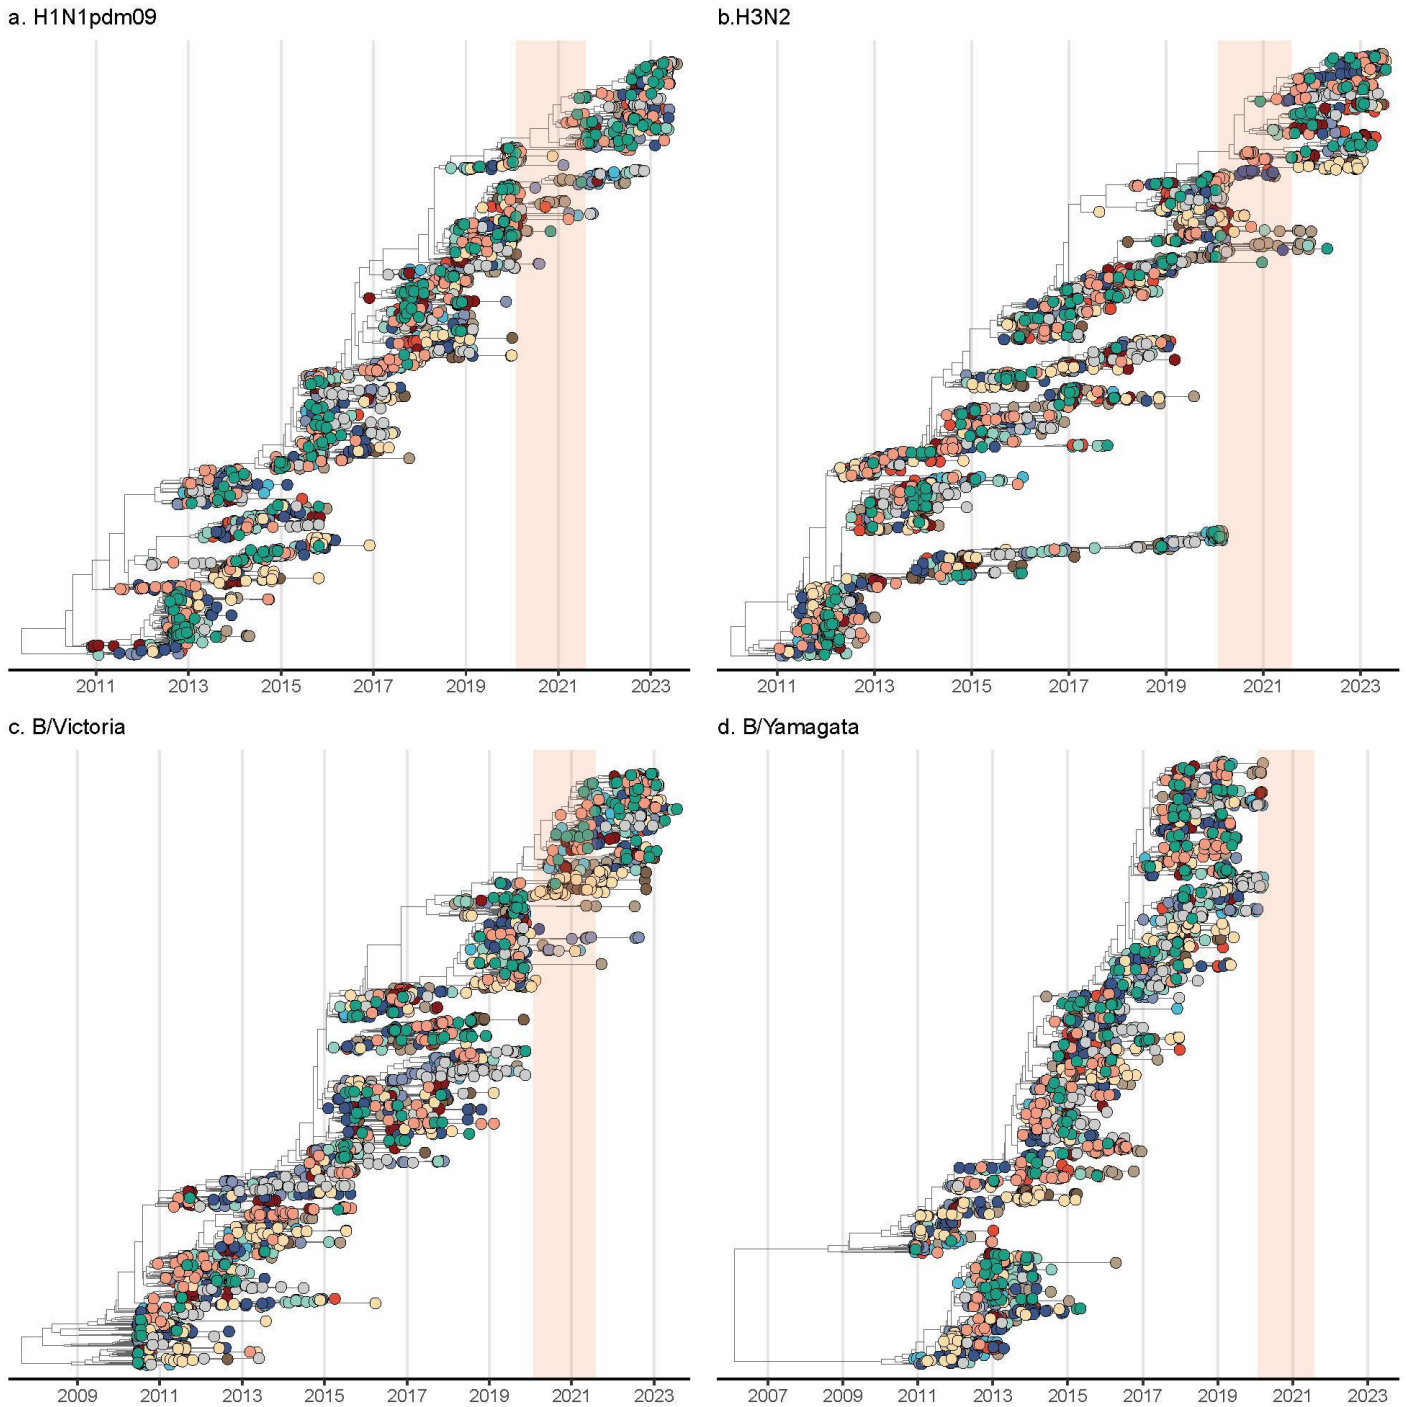

749

750

751

752

753

754

*Extended Data Fig. 10 | Maximum clade credibility (MCC) tree of seasonal influenza viruses dating back to 2011.*

*Tips are annotated with the geographic regions whose colour legends are the same with Figure 3. The light orange shadow area represents the NPIs-intensive phase of COVID-19 pandemic, defined as spanning from 1 February 2020 to 31 July 2021.*

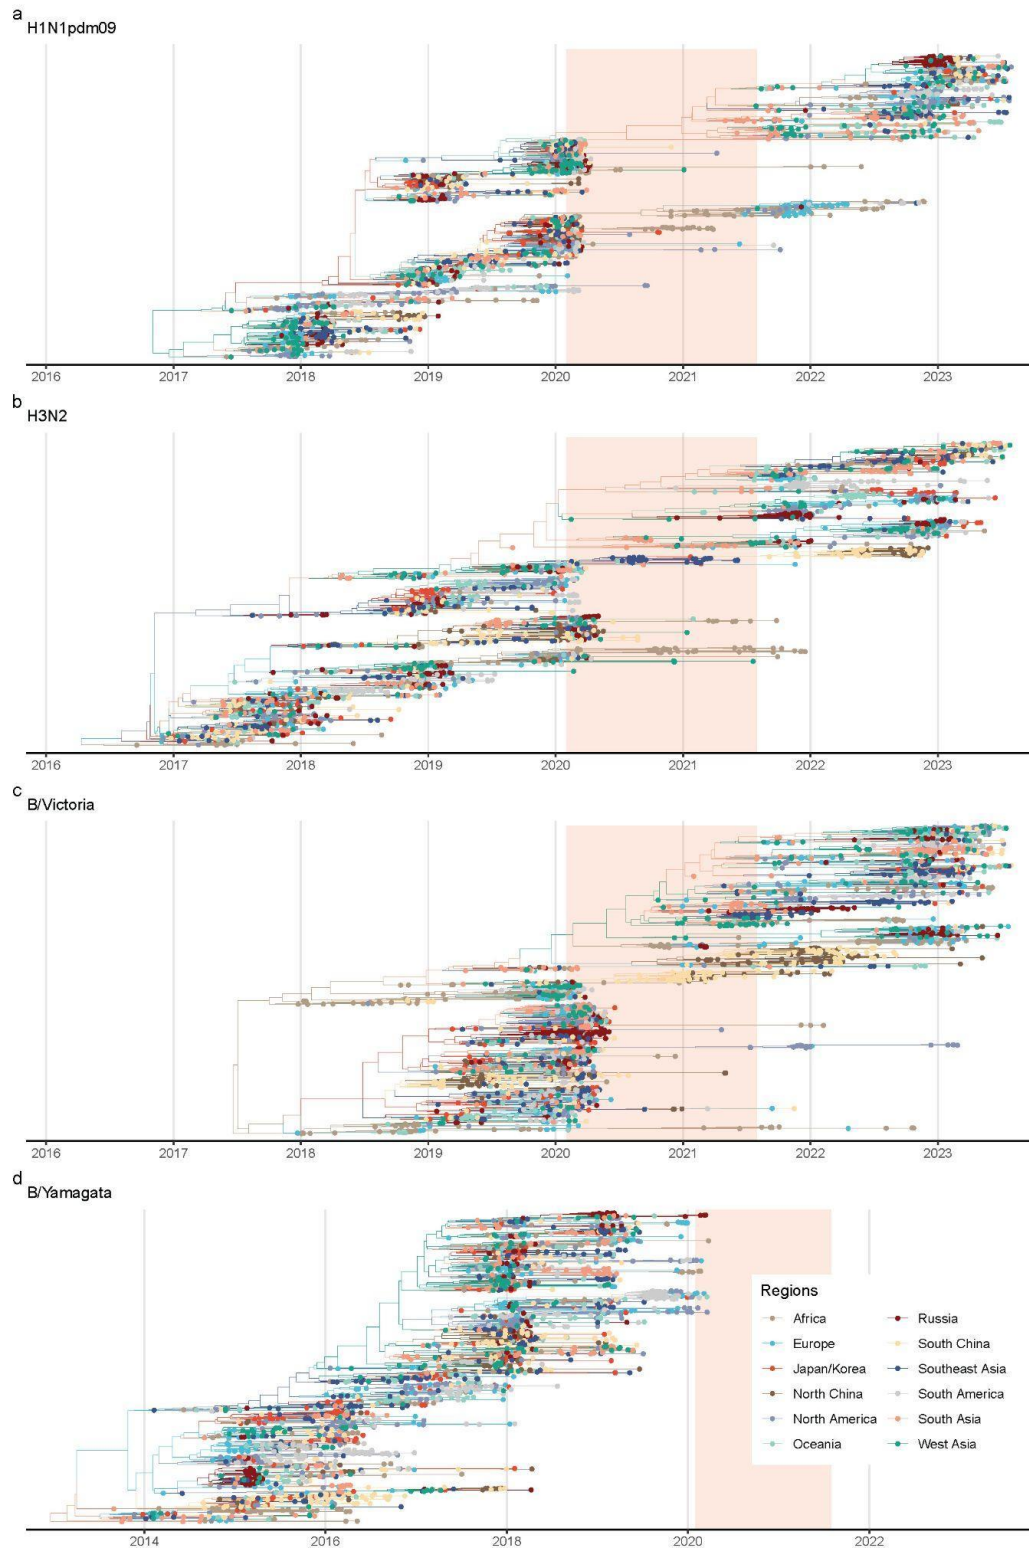

755

756

757

758

759

760

*Extended Data Fig. 11 | Maximum clade credibility (MCC) tree of the recently circulating clades of seasonal influenza viruses.*

*The light orange shadow area represents the NPIs-intensive phase of COVID-19 pandemic, defined as spanning from 1 February 2020 to 31 July 2021.*

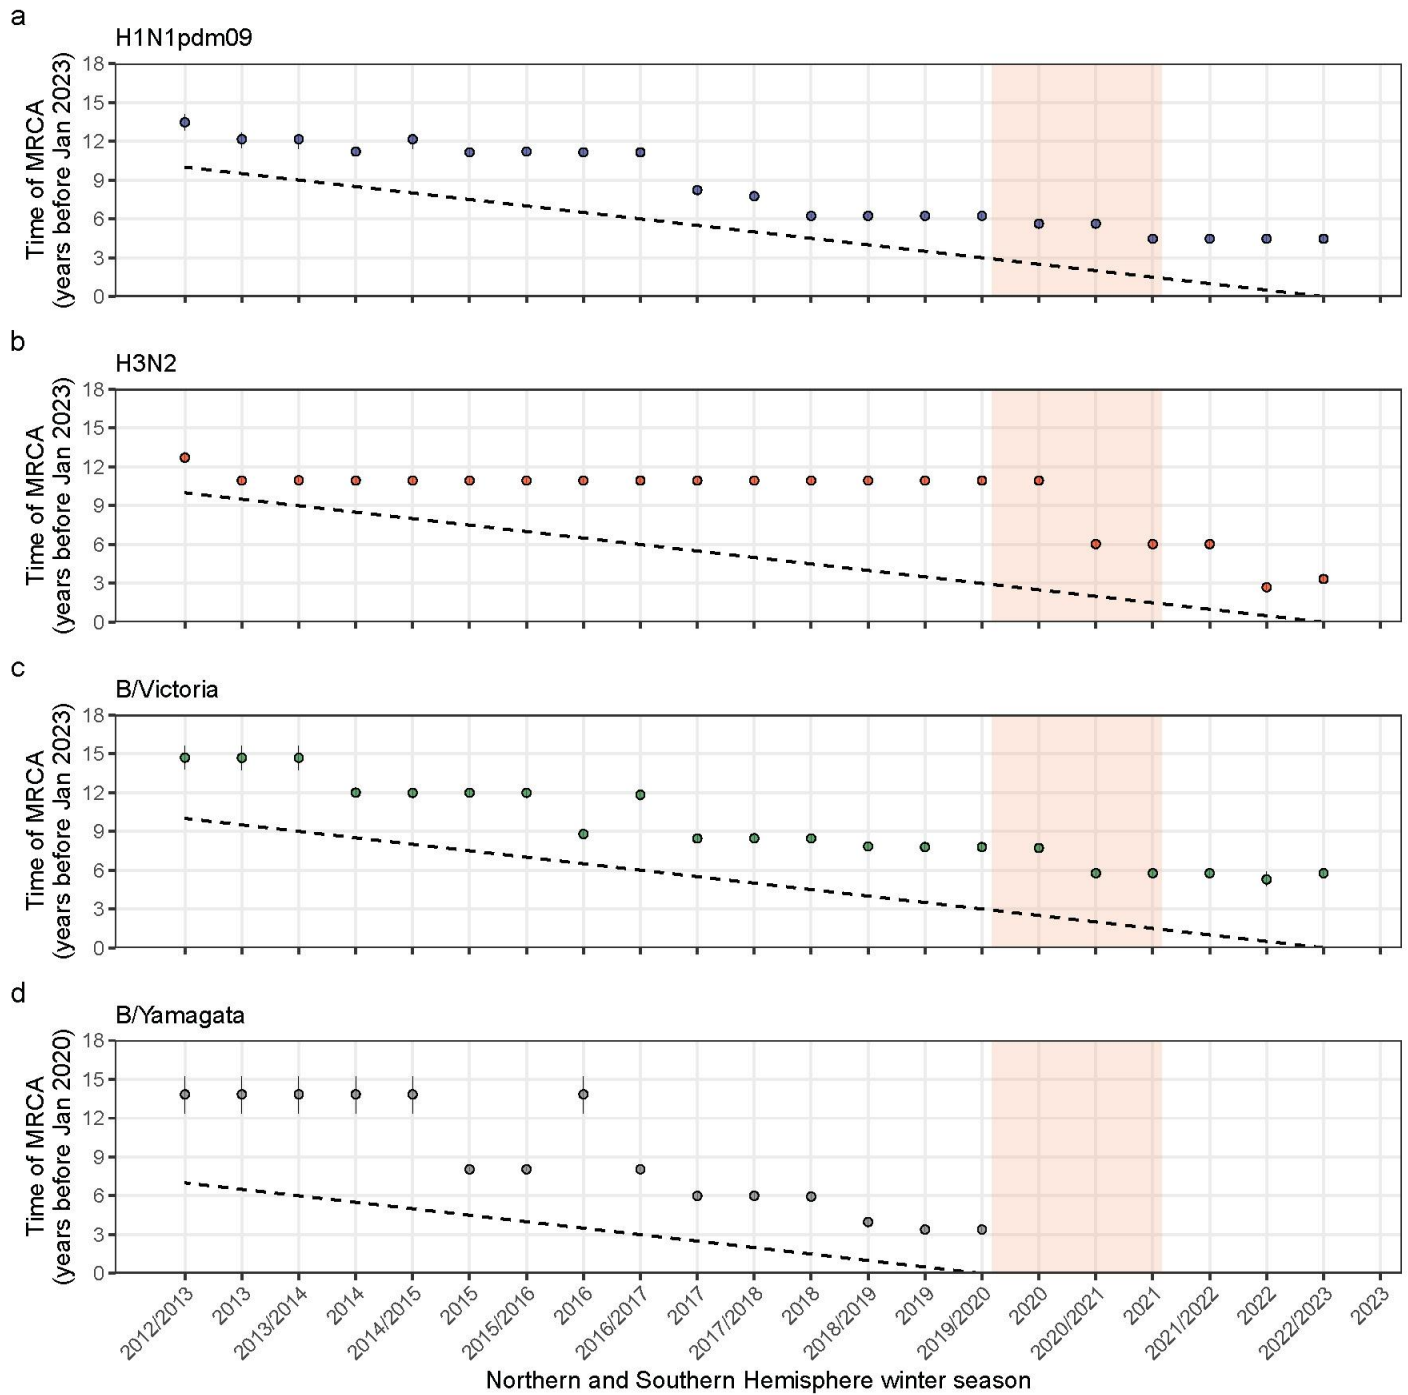

761

762

**Extended Data Fig. 12 | Lineage turnover of seasonal influenza viruses over influenza season.**

763

Lineage turnover was indicated by the time to the most recent common ancestor (TMRCA) of influenza viruses circulating during each season, in which mean values and 95% highest posterior density intervals were shown.

764

The diagonal dotted line approximated the seasonal mid-point, which goes through 1st January of the Northern Hemisphere winter season and 1st July of the Southern Hemisphere winter season. Here, the Southern

765

Hemisphere winter season was applied to Oceania, South America, and the Southern part of Africa.

766

767

## 768 **Supplementary Information**

### 769 **Supplementary text: GLM diffusion predictors**

770 Here, we included multiple categories of potential predictors of influenza spread in  
771 phylogeographic GLM framework and provided more details as follows:

772 **Distance:** We constructed a symmetric matrix of population-weighted distance among each  
773 pair of geographic regions. Within each geographic region we defined above, we first  
774 collected the population, centroid latitudes, and centroid longitudes at counties/states level,  
775 where we adopted state-level data as the spatial resolution for some countries with large land  
776 areas (Russia, Canada, China, United States, Brazil, Australia). The general formula for  
777 calculating the population-weighted distance between region  $i$  and region  $j$  is<sup>68</sup>:

$$d_{ij} = \sum_{k \in i} \left( \frac{Pop_k}{Pop_i} \right) \sum_{l \in j} \left( \frac{Pop_l}{Pop_j} \right) d_{k,l}$$

778 where  $Pop_k$  refers to the population of country  $k$  or state  $k$  belonging to region  $i$ ,  $Pop_l$  the  
779 population of country  $l$  or state  $l$  belonging to region  $j$ , and  $d_{k,l}$  the distance between country  $k$   
780 or state  $k$  and country  $l$  or state  $l$ .

781  
782  
783 **Latitude:** Here we calculated the region-level latitudes that are weighted by population at  
784 country/state level, in which the state-level spatial resolution was used in several countries  
785 with expansive land areas (Russia, Canada, China, United States, Brazil, and Australia).

786  
787 **Temperature/Precipitation/Relative humidity:** We obtained meteorologic data from the  
788 ECMWF Reanalysis v5 (ERA5), which provides monthly average data for temperature,  
789 precipitation, relative humidity at a resolution of  $0.25^\circ \times 0.25^\circ$  from 1979 to present<sup>69</sup>. To  
790 create interval-specific and region-specific ones, we averaged data from all grid cells within  
791 each pre-defined geographic region in each month and then averaged them during specific  
792 time intervals. Here, the first interval spanned from February 2018 to January 2020 (24  
793 months), matching the duration of the third interval (from August 2021 to July 2023).

794  
795 **Air passenger traffic between and within regions:** The origin-destination air traffic data  
796 up to July 2023 were provided by Official Airline Guide (OAG) Ltd. through a data sharing  
797 agreement (<https://www.oag.com/>). This dataset comprises 3,907 international airports and  
798 1,469 domestic airports, with numbers of travel volume released on a monthly basis. Due to  
799 the delay of air traffic data release, the air traffic data in June and July 2023 are preliminarily  
800 adjusted while others are finally adjusted by OAG. We calculated the average monthly  
801 number of passengers on flights between each pair of regions per period we defined above.  
802 Additionally, we computed the monthly average number of air passengers travelled within  
803 each geographic region, which serves as a proxy for within-location air connectivity. The air  
804 traffic data used in the first, second, and third period ranged from February 2018 to January  
805 2020 (24 months), from February 2020 to July 2021 (18 months), and from August 2021 to  
806 July 2023 (24 months), respectively.

807

808 **COVID-19 stringency index:** During the COVID-19 pandemic, the Oxford Coronavirus  
809 Government Response Tracker (OxCGRT) created a Stringency Index based on nine  
810 response indicators, spanning from 3 January 2020 to 31 December 2022<sup>70</sup>. We first  
811 calculated the mean COVID-19 stringency index for each country during each period. Due  
812 to data availability constraints, the first interval covered only 3 January 2020 to 31 January  
813 2020; while the third interval ranged from 1 August 2021 to 31 December 2022.  
814 Subsequently, we computed a region-level index weighted by the population of each  
815 country.

816

817 **Infectious disease vulnerability index:** This index was developed to evaluate countries  
818 vulnerable to infectious disease outbreaks<sup>71</sup>. Here, we also computed a region-level index  
819 weighted by each country's population.

820 **Supplementary tables and figures**

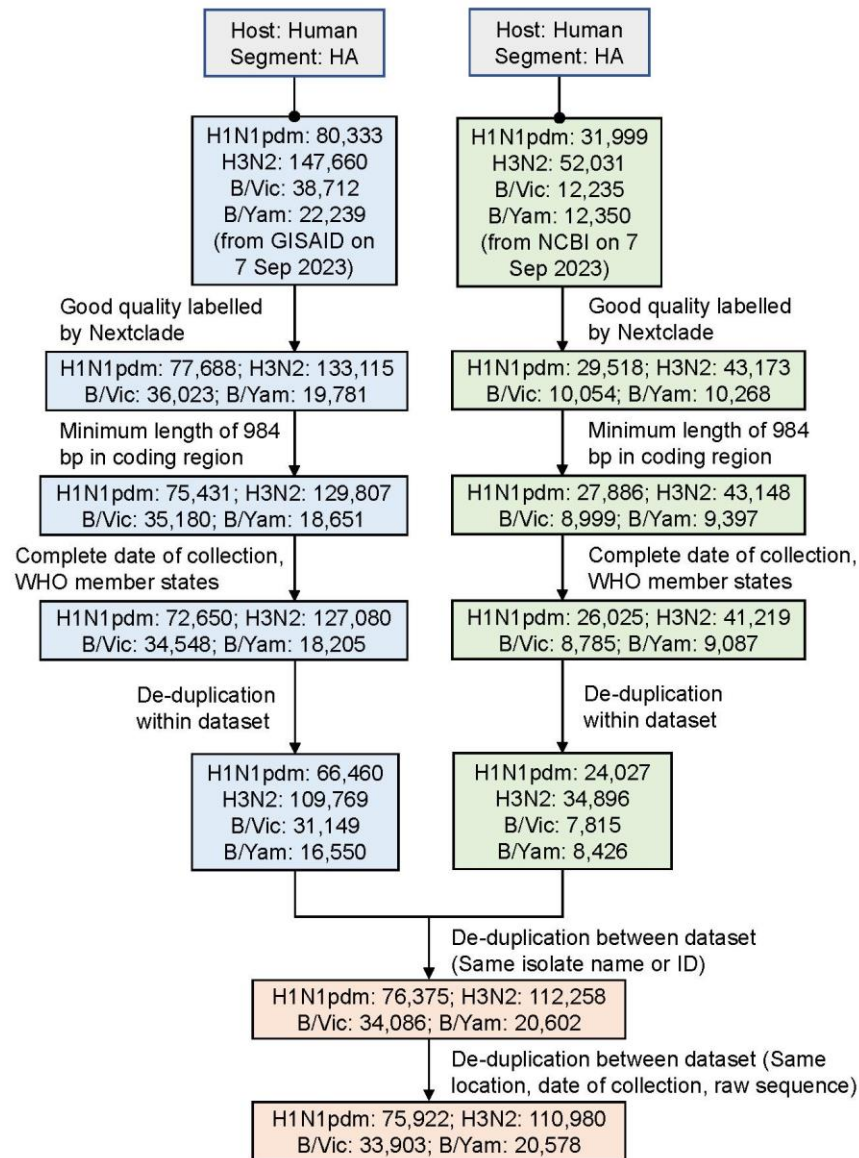

821

822 *Supplementary Fig. 1 | Flowchart of collating genetic data of seasonal influenza viruses.*

823

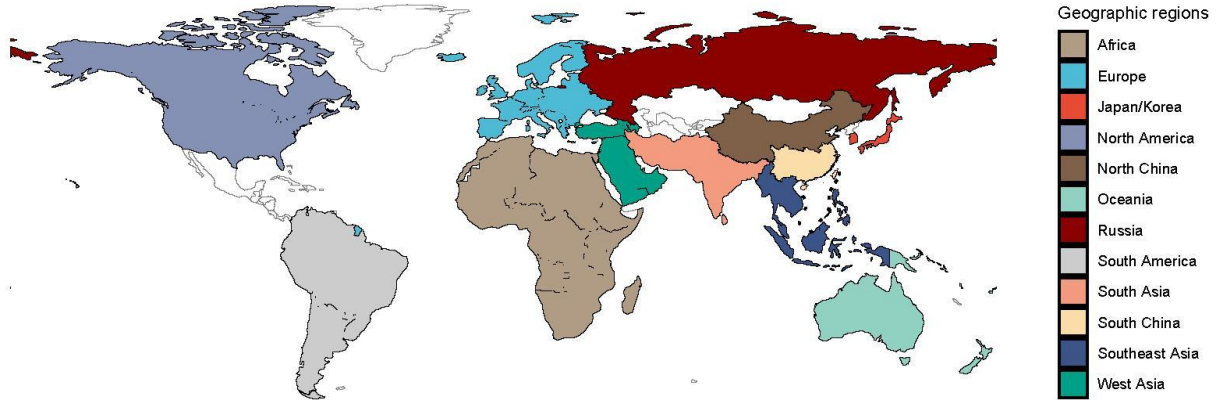

824

825 *Supplementary Fig. 2 | Geographic regions used in this study.*

826 Locations that are not included into this work are labelled as white.

827

828



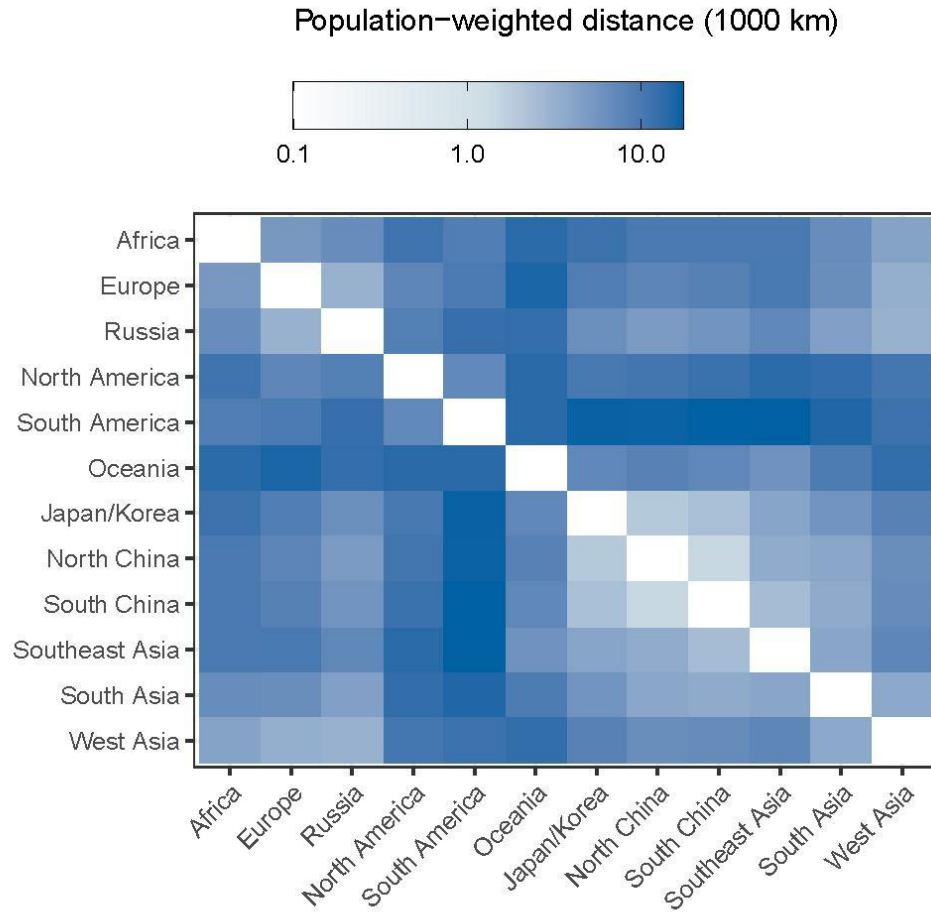

829

830 *Supplementary Fig. 3 | Population-weighted distance between geographic regions.*

831

a

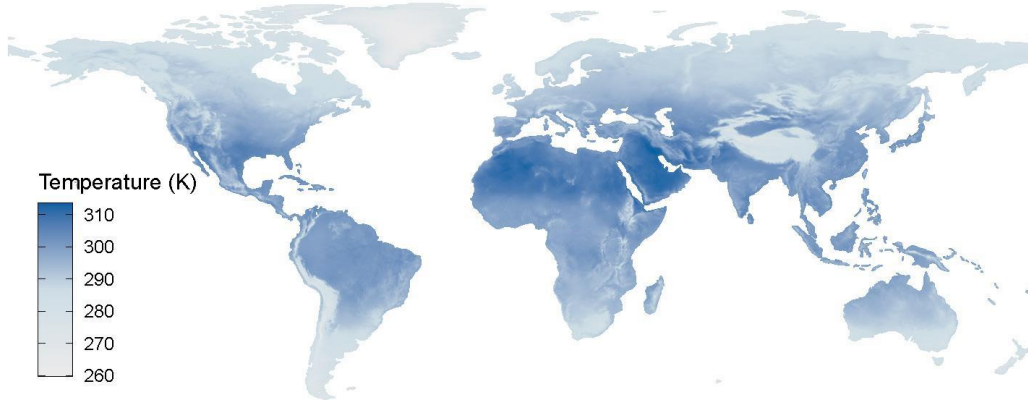

b

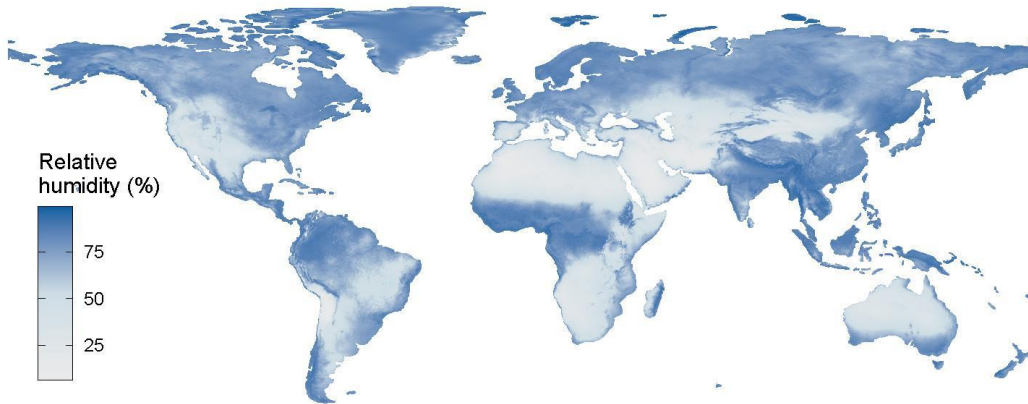

c

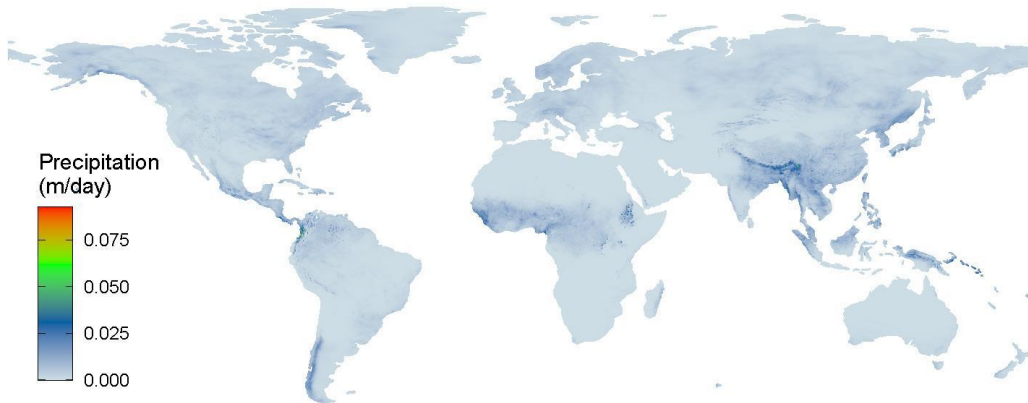

832

833 *Supplementary Fig. 4 | Mean temperature, relative humidity, precipitation at a spatial*  
834 *resolution of  $0.25^\circ \times 0.25^\circ$ .*

835 Here, we presented the data in August 2023 as an example.

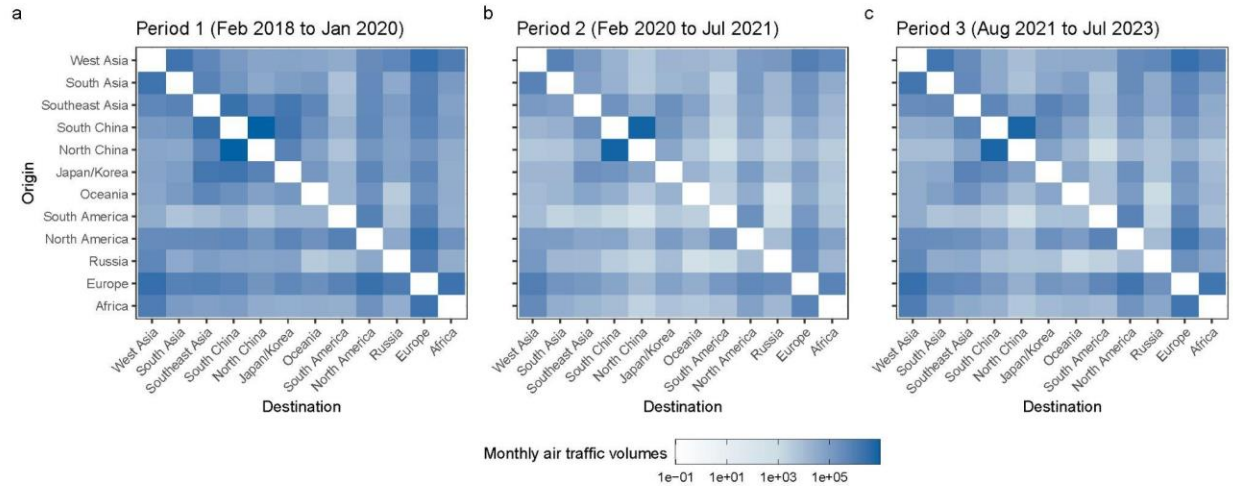

836

837 *Supplementary Fig. 5 / Monthly average of inter-regional air traffic matrices during the three*  
838 *periods.*

839

a. Second period

b. Third period

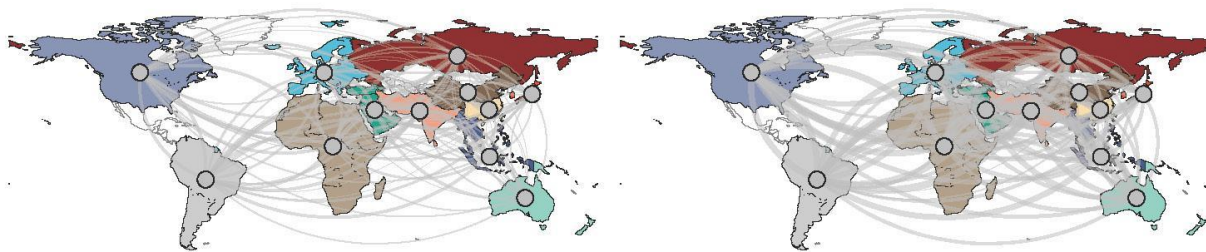

Reduction relative to pre-pandemic level

— 0.0 — 0.4 — 0.8 — 1.2 — 1.6

840

841 *Supplementary Fig. 6 / The air traffic reduction relative to pre-pandemic level in the second*  
842 *and third periods.*

843

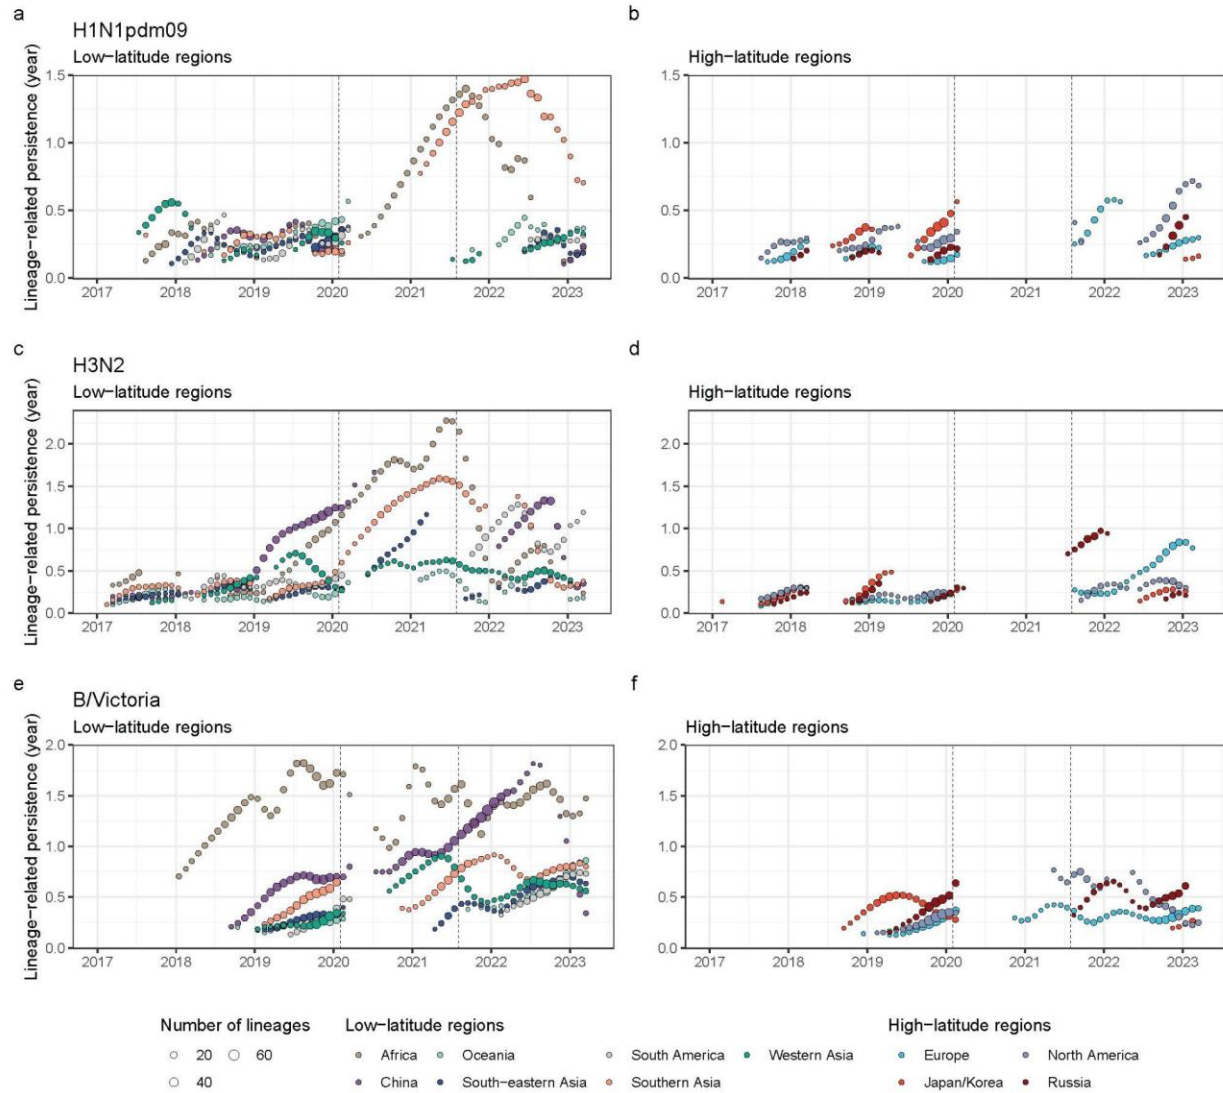

844

845 *Supplementary Fig. 7 | Lineage-associated persistence dynamic across geographic regions*  
846 *over time.*

847 This plot only showed the lineage-associated persistence at time points when the number of  
848 lineages circulating at that time points are over 5, in order to ensure the estimate of lineage-  
849 associated persistence will not be affected by the small size of lineages.

850

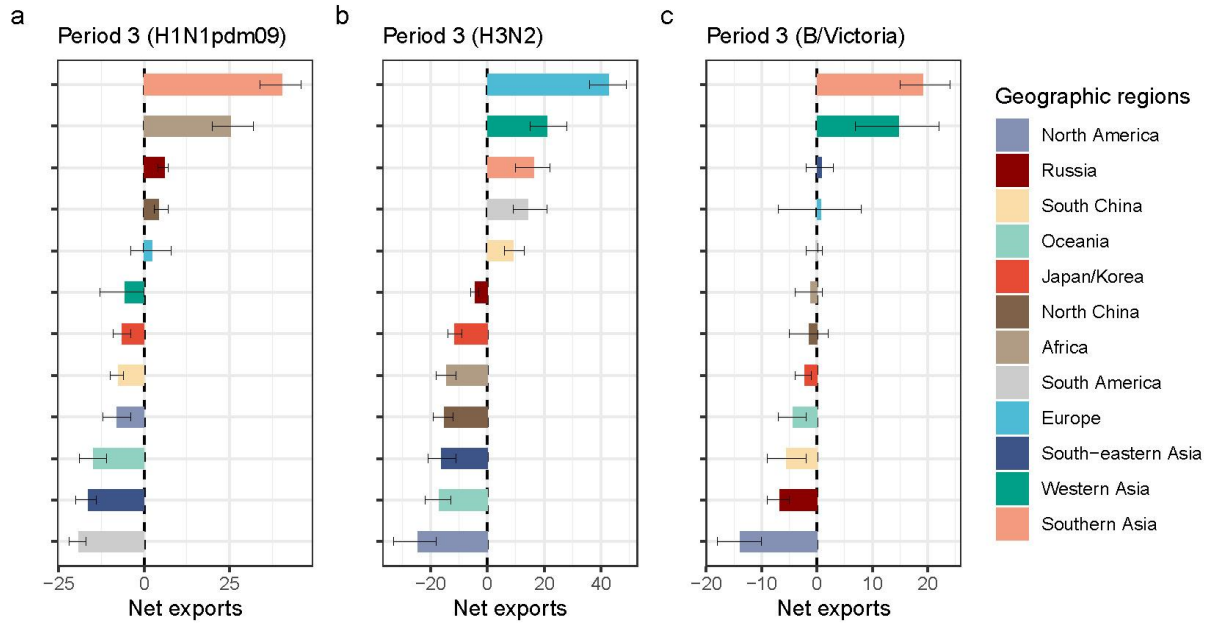

851

852 *Supplementary Fig. 8 | Net export dynamic of seasonal influenza in the third period under*  
853 *sub-sampling strategy accounting for the temporal variation.*

854

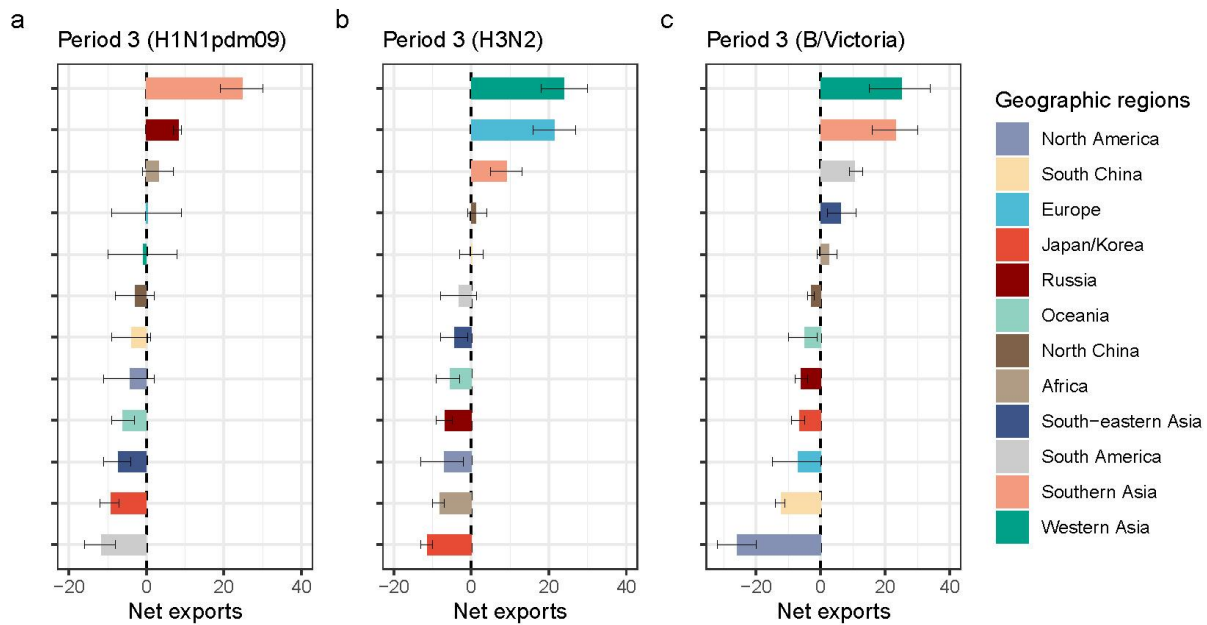

855

856 *Supplementary Fig. 9 | Net export dynamic of seasonal influenza in the third period when*  
857 *using region-specific cutoffs for defining the third period under the even sub-sampling*  
858 *strategy.*

859

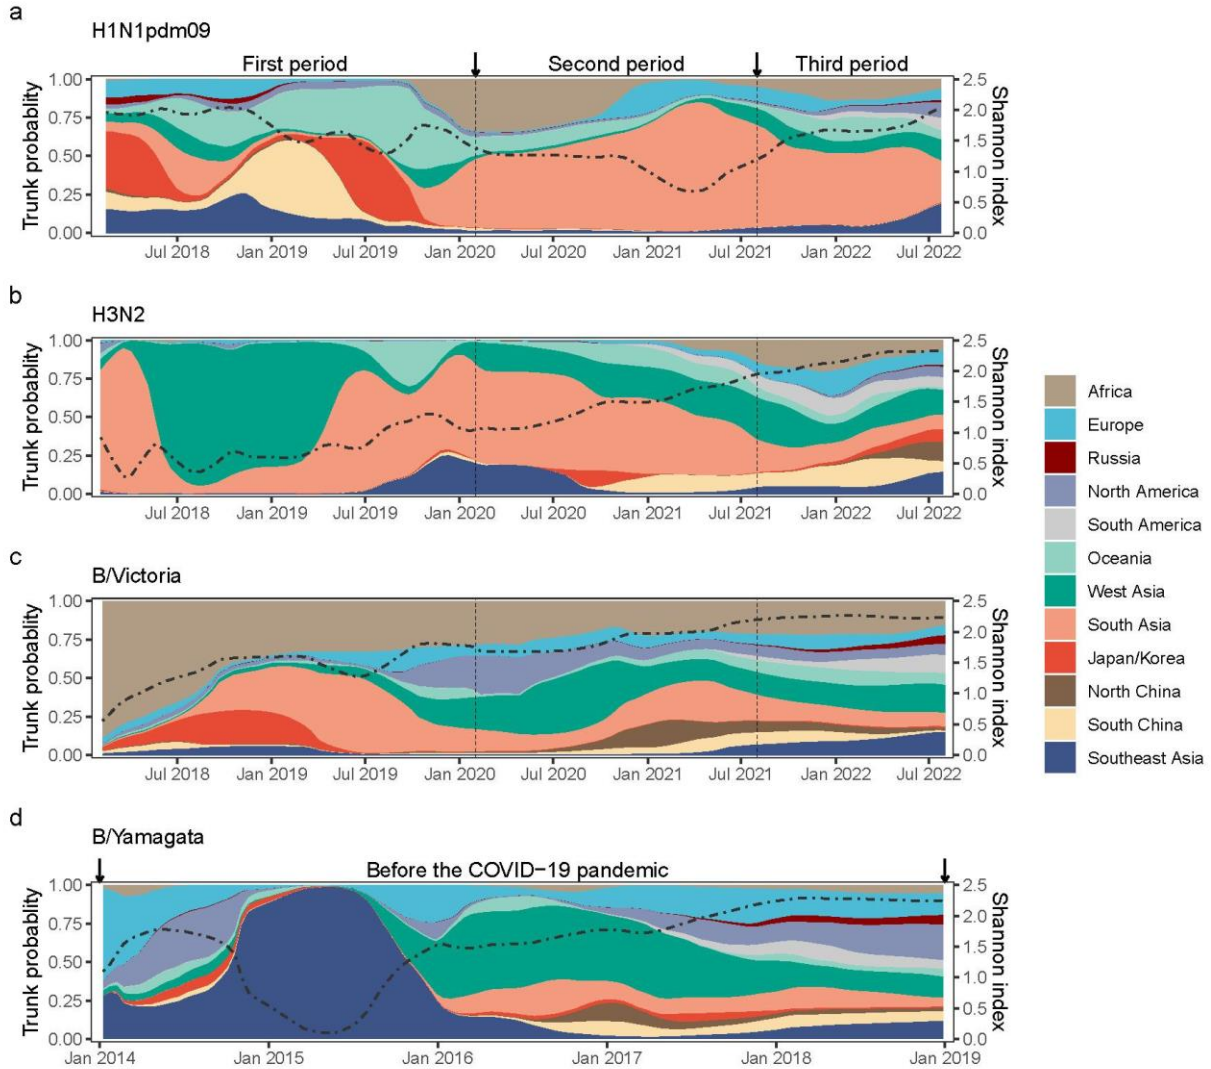

860

861 *Supplementary Fig. 10 | Inferred trunk location of phylogenetic trees under even sub-*  
862 *sampling strategy.*

863

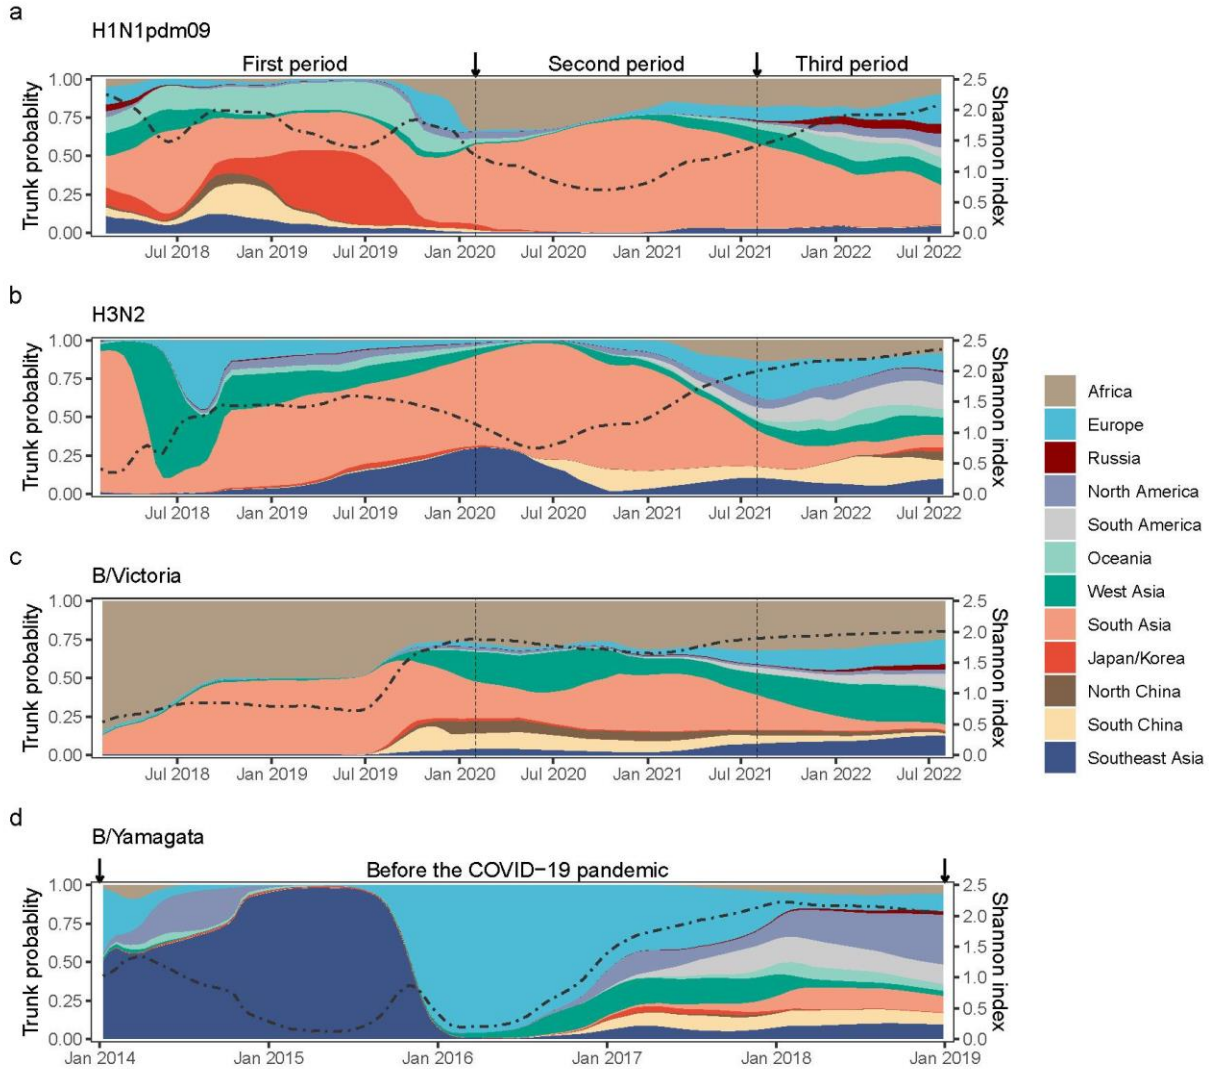

864

865 *Supplementary Fig. 11 | Inferred trunk location of phylogenetic trees under sub-sampling*  
866 *strategy accounting for the temporal variation.*

867

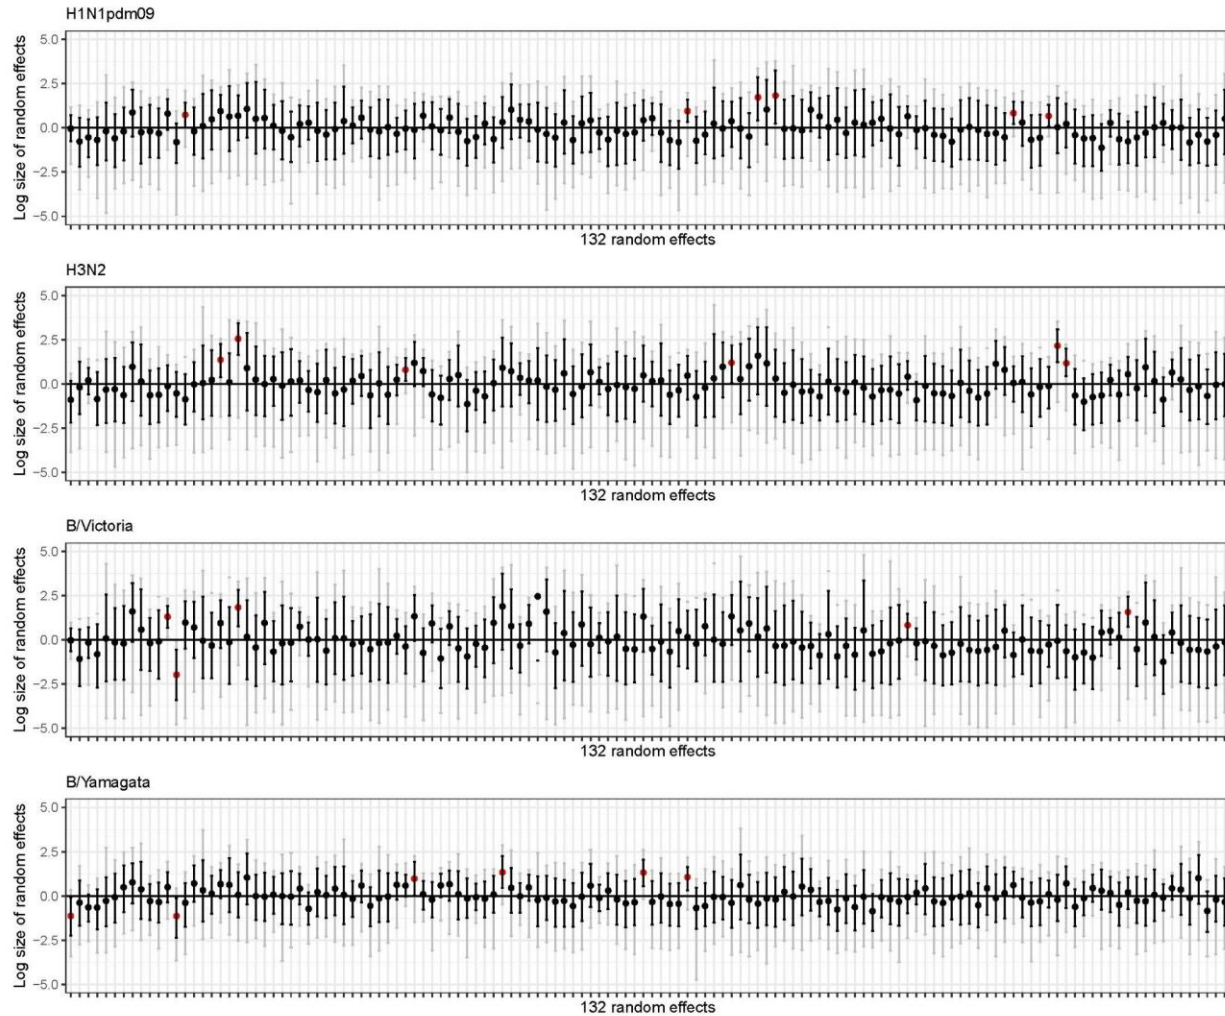

868

869 *Supplementary Fig. 12 | Posterior summary of the GLM random effects under even sampling*  
870 *strategy.*

871 *Black points and error bars refer to the posterior mean and 95% HPD intervals, while grey*  
872 *error bars represent the minimum and maximum of the log size of random effects. Those random*  
873 *effects of transition rate with their 95% HPD intervals deviating 0 were marked as red points.*

874



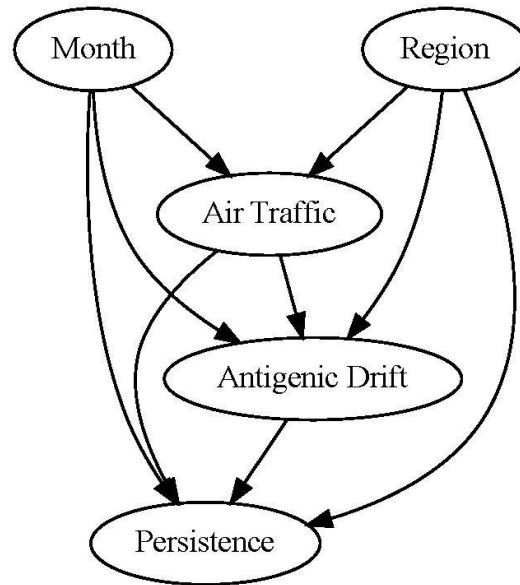

875

876 *Supplementary Fig. 13 | The directed acyclic graph (DAG) framework used in Bayesian*  
877 *hierarchical regression model.*

878

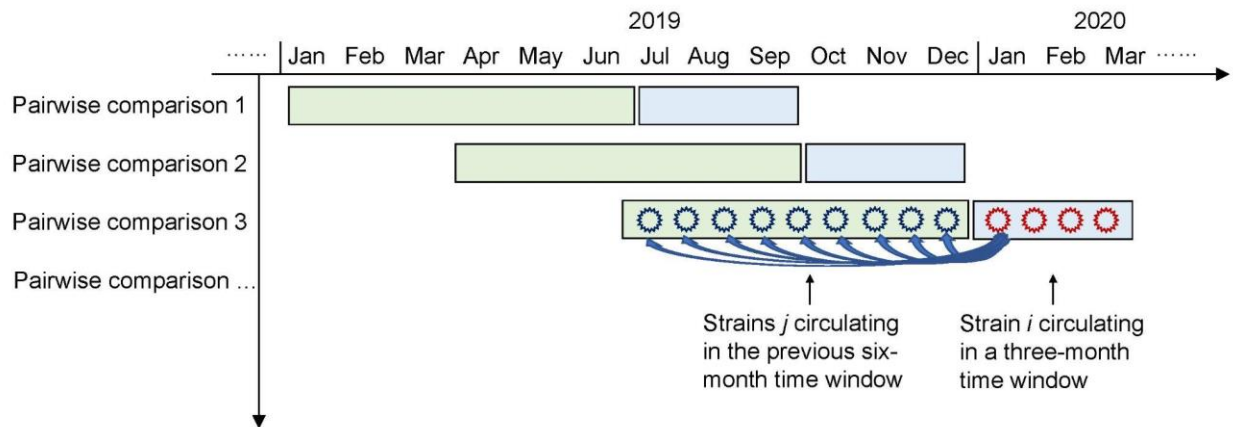

879

880 *Supplementary Fig. 14 | The conceptual representation of using genetic data to measure cross-*  
881 *immunity to indicate the extent of antigenic drift.*

882

883 **Supplementary Table 1. Potential predictors of spatial spread of seasonal influenza**  
 884 **included in this study**

| Predictors                                       | Time-variable | Details                                                                                                                           | Source                                                     |
|--------------------------------------------------|---------------|-----------------------------------------------------------------------------------------------------------------------------------|------------------------------------------------------------|
| <b>Demographic predictors</b>                    |               |                                                                                                                                   |                                                            |
| Population size*                                 | No            | Data in 2021                                                                                                                      | UN World Population Prospects <sup>72</sup>                |
| Population density*                              | No            | Data in 2021                                                                                                                      |                                                            |
| Proportion of population less than 15 years old* | No            | Data in 2021                                                                                                                      |                                                            |
| <b>Geographic predictors</b>                     |               |                                                                                                                                   |                                                            |
| Distance                                         | No            | Population weighted distance (symmetric matrix)                                                                                   | -                                                          |
| Latitude*                                        | No            | Population weighted latitude                                                                                                      | -                                                          |
| <b>Climate predictors</b>                        |               |                                                                                                                                   |                                                            |
| Temperature*                                     | Yes           | Mean temperature of air at 2 m above the surface of land, sea or in-land waters (K)                                               | European Centre for Medium Range Weather Forecasts (ECMWF) |
| Precipitation*                                   | Yes           | Daily mean precipitation (m/day)                                                                                                  |                                                            |
| Relative humidity*                               | Yes           | Mean surface air relative humidity (%)                                                                                            |                                                            |
| <b>Mobility-related predictors</b>               |               |                                                                                                                                   |                                                            |
| Air passenger traffic between regions            | Yes           | Monthly average of number of passengers on flights between each pair of regions                                                   | OAG                                                        |
| Air passenger traffic within region*             | Yes           | Monthly average of number of passengers on flights within each geographic region                                                  | OAG                                                        |
| <b>Other predictors</b>                          |               |                                                                                                                                   |                                                            |
| COVID-19 stringency index*                       | Yes           | Population-weighted index per region per interval                                                                                 | 70                                                         |
| Infectious disease vulnerability index*          | No            | Population-weighted indicator of the vulnerability to infectious disease outbreak from 0 (most vulnerable) to 1 (less vulnerable) | 71                                                         |
| Sample size*                                     | Yes           | Number of sampled sequences in each period                                                                                        | -                                                          |

885 \* Location-specific predictors were included for both origin (O) and destination (D) locations in  
886 the pairwise transition rates.

**Supplementary Table 2. Predictors of spatial spread of seasonal influenza used in GLM framework in this study**

| <b>Predictors</b>                      | <b>Africa</b> | <b>Europe</b> | <b>Russia</b> | <b>North America</b> | <b>South America</b> | <b>Oceania</b> | <b>Japan/Korea</b> | <b>North China</b> | <b>South China</b> | <b>Southeast Asia</b> | <b>South Asia</b> | <b>West Asia</b> |
|----------------------------------------|---------------|---------------|---------------|----------------------|----------------------|----------------|--------------------|--------------------|--------------------|-----------------------|-------------------|------------------|
| Pop size (million)                     | 1391.8        | 598.0         | 145.1         | 375.2                | 434.0                | 43.6           | 176.4              | 575.9              | 865.9              | 675.8                 | 1989.5            | 284.6            |
| Pop density (pop per km <sup>2</sup> ) | 46.9          | 103.9         | 8.9           | 20.7                 | 25.0                 | 5.1            | 381.8              | 84.1               | 331.1              | 153.3                 | 311.2             | 59.5             |
| Prop of pop under 15 (%)               | 40.4          | 15.4          | 17.7          | 18.0                 | 22.5                 | 23.1           | 11.8               | 17.8               | 17.9               | 24.8                  | 27.4              | 28.8             |
| Latitude                               | 5.3           | 48.5          | 54.3          | 39.1                 | -14.9                | -27.3          | 36.1               | 38.1               | 27.9               | 8.0                   | 22.7              | 31.6             |
| Temperature 1 (K)*                     | 297.9         | 281.7         | 269.4         | 272.9                | 294.7                | 295.4          | 285.8              | 277.3              | 289.3              | 298.6                 | 293.9             | 295.7            |
| Temperature 2 (K)                      | 298.2         | 282.0         | 270.8         | 273.7                | 294.4                | 294.5          | 285.9              | 278.5              | 289.9              | 298.7                 | 294.5             | 296.2            |
| Temperature 3 (K)                      | 297.9         | 281.7         | 269.3         | 273.3                | 294.5                | 294.6          | 285.9              | 277.5              | 289.5              | 298.5                 | 294.0             | 295.5            |
| Precipitation 1 (mm/day)               | 1.9           | 2.3           | 1.5           | 2.0                  | 4.6                  | 1.5            | 4.6                | 1.4                | 4.1                | 6.8                   | 2.5               | 0.8              |
| Precipitation 2 (mm/day)               | 1.7           | 2.5           | 1.5           | 1.9                  | 4.4                  | 2.0            | 4.9                | 1.5                | 4.6                | 7.4                   | 2.5               | 0.7              |
| Precipitation 3 (mm/day)               | 1.7           | 2.4           | 1.5           | 1.9                  | 4.5                  | 2.0            | 4.7                | 1.4                | 4.0                | 7.6                   | 2.4               | 0.7              |
| Relative humidity 1 (%)                | 51.1          | 76.4          | 75.0          | 72.7                 | 73.6                 | 48.4           | 74.1               | 54.7               | 77.0               | 81.5                  | 57.1              | 46.3             |
| Relative humidity 2 (%)                | 49.9          | 75.3          | 73.3          | 70.8                 | 72.8                 | 53.8           | 74.5               | 53.2               | 76.6               | 81.6                  | 55.8              | 42.6             |
| Relative humidity 3 (%)                | 50.0          | 76.4          | 74.8          | 71.6                 | 72.5                 | 55.0           | 74.7               | 54.2               | 75.3               | 82.5                  | 57.4              | 44.4             |
| Air traffic within region 1 (million)  | 4.2           | 51.5          | 3.9           | 54.1                 | 13.5                 | 6.3            | 10.0               | 6.8                | 19.0               | 21.8                  | 11.3              | 8.0              |
| Air traffic within region 2 (million)  | 1.8           | 13.7          | 3.7           | 25.7                 | 5.3                  | 2.6            | 5.7                | 5.1                | 14.7               | 8.8                   | 5.7               | 3.3              |
| Air traffic within region 3 (million)  | 3.8           | 41.4          | 4.8           | 50.0                 | 12.1                 | 4.5            | 8.5                | 3.9                | 12.5               | 13.6                  | 10.9              | 6.5              |
| Stringency index 1                     | 0.7           | 1.1           | 0.6           | 0.1                  | 1.1                  | 1.8            | 1.7                | 23.1               | 23.1               | 4.5                   | 2.1               | 0.5              |
| Stringency index 2                     | 51.1          | 60.4          | 47.9          | 61.9                 | 67.6                 | 53.8           | 44.7               | 71.9               | 70.7               | 64.2                  | 68.8              | 59.3             |
| Stringency index 3                     | 30.5          | 26.6          | 36.6          | 37.4                 | 34.0                 | 38.3           | 38.3               | 77.9               | 76.3               | 46.1                  | 45.3              | 30.4             |
| Infectious disease vulnerability index | 0.34          | 0.83          | 0.64          | 0.93                 | 0.67                 | 0.76           | 0.91               | 0.66               | 0.67               | 0.58                  | 0.46              | 0.58             |

\* The number after the predictors represents the three time intervals defined in this study.

Supplementary Table 3. The sample size of each influenza virus per period per geographic region per sub-sampling strategy

| Sub-sampling strategy* | Periods  | Africa | Europe | Russia | North America | South America | Oceania | Japan/Korea | North China | South China | Southeast Asia | South Asia | West Asia |
|------------------------|----------|--------|--------|--------|---------------|---------------|---------|-------------|-------------|-------------|----------------|------------|-----------|
| <b>H1N1pdm09</b>       |          |        |        |        |               |               |         |             |             |             |                |            |           |
| Even                   | Period 1 | 104    | 116    | 81     | 121           | 72            | 83      | 92          | 66          | 84          | 91             | 90         | 123       |
| Even                   | Period 2 | 56     | 21     | 20     | 19            | 31            | 19      | 8           | 15          | 17          | 11             | 21         | 10        |
| Even                   | Period 3 | 72     | 78     | 53     | 70            | 51            | 54      | 21          | 18          | 21          | 51             | 72         | 74        |
| Temporal               | Period 1 | 94     | 98     | 80     | 119           | 102           | 91      | 65          | 39          | 73          | 102            | 92         | 102       |
| Temporal               | Period 2 | 97     | 26     | 24     | 35            | 30            | 28      | 24          | 11          | 13          | 25             | 42         | 23        |
| Temporal               | Period 3 | 75     | 89     | 30     | 59            | 48            | 66      | 14          | 13          | 18          | 38             | 66         | 49        |
| Spatiotemporal         | Period 1 | 30     | 237    | 44     | 453           | 39            | 35      | 18          | 18          | 56          | 24             | 35         | 69        |
| Spatiotemporal         | Period 2 | 87     | 49     | 17     | 197           | 2             | 2       | 3           | -           | 2           | 1              | 11         | 6         |
| Spatiotemporal         | Period 3 | 40     | 182    | 18     | 120           | 54            | 33      | 1           | 28          | 53          | 5              | 32         | 10        |
| <b>H3N2</b>            |          |        |        |        |               |               |         |             |             |             |                |            |           |
| Even                   | Period 1 | 84     | 99     | 72     | 105           | 65            | 95      | 98          | 76          | 94          | 86             | 82         | 76        |
| Even                   | Period 2 | 42     | 12     | 18     | 7             | 21            | 19      | 15          | 10          | 19          | 43             | 36         | 20        |
| Even                   | Period 3 | 59     | 70     | 69     | 70            | 69            | 64      | 46          | 42          | 48          | 54             | 61         | 68        |
| Temporal               | Period 1 | 57     | 98     | 39     | 111           | 52            | 91      | 56          | 17          | 83          | 117            | 61         | 71        |
| Temporal               | Period 2 | 48     | 14     | 8      | 15            | 2             | 7       | 1           | -           | 5           | 48             | 43         | 5         |
| Temporal               | Period 3 | 97     | 113    | 44     | 111           | 105           | 89      | 51          | 37          | 78          | 103            | 69         | 88        |
| Spatiotemporal         | Period 1 | 36     | 145    | 22     | 278           | 24            | 87      | 22          | 19          | 86          | 53             | 43         | 38        |
| Spatiotemporal         | Period 2 | 45     | 23     | 6      | 17            | -             | 5       | -           | -           | 6           | 51             | 40         | 7         |
| Spatiotemporal         | Period 3 | 23     | 231    | 17     | 492           | 52            | 22      | 13          | 16          | 53          | 21             | 25         | 15        |
| <b>B/Victoria</b>      |          |        |        |        |               |               |         |             |             |             |                |            |           |
| Even                   | Period 1 | 104    | 59     | 52     | 65            | 55            | 62      | 59          | 49          | 81          | 67             | 71         | 66        |
| Even                   | Period 2 | 38     | 42     | 37     | 28            | 26            | 16      | 21          | 33          | 66          | 34             | 28         | 37        |
| Even                   | Period 3 | 92     | 90     | 69     | 90            | 62            | 68      | 22          | 59          | 78          | 81             | 63         | 80        |
| Temporal               | Period 1 | 140    | 94     | 76     | 119           | 57            | 80      | 87          | 34          | 106         | 106            | 102        | 106       |

|                   |          |     |     |     |     |     |     |     |    |     |     |     |     |
|-------------------|----------|-----|-----|-----|-----|-----|-----|-----|----|-----|-----|-----|-----|
| Temporal          | Period 2 | 56  | 42  | 36  | 36  | 34  | 13  | 32  | 21 | 58  | 19  | 33  | 31  |
| Temporal          | Period 3 | 70  | 61  | 34  | 36  | 46  | 30  | 9   | 21 | 54  | 42  | 33  | 40  |
| Spatiotemporal    | Period 1 | 79  | 73  | 17  | 592 | 8   | 44  | 26  | 24 | 166 | 35  | 30  | 15  |
| Spatiotemporal    | Period 2 | 35  | 88  | 17  | 151 | 5   | -   | 4   | 12 | 75  | 6   | 11  | 7   |
| Spatiotemporal    | Period 3 | 38  | 131 | 12  | 37  | 66  | 21  | -   | 34 | 69  | 24  | 25  | 17  |
| <b>B/Yamagata</b> |          |     |     |     |     |     |     |     |    |     |     |     |     |
| Even              | -        | 180 | 221 | 114 | 210 | 191 | 180 | 167 | 96 | 173 | 190 | 166 | 141 |
| Temporal          | -        | 143 | 218 | 80  | 338 | 240 | 153 | 158 | 63 | 170 | 218 | 92  | 130 |
| Spatiotemporal    | -        | 52  | 450 | 22  | 890 | 118 | 97  | 63  | 27 | 140 | 65  | 38  | 42  |

\* “Even” denotes even sampling strategy; “Temporal” denotes sampling strategy accounting for the temporal variation; “Spatiotemporal” denotes sampling strategy accounting for the temporal and spatial variation.

893  
894

**Supplementary Table 4. Parameter estimates under the 3-period phylogeographic model with air traffic data as the sole predictor of relative and overall transition rates**

|            | Coefficient of air traffic in estimating overall transition rate | Overall average transition rate                                                                    | Coefficient of air traffic in estimating relative transition rate |
|------------|------------------------------------------------------------------|----------------------------------------------------------------------------------------------------|-------------------------------------------------------------------|
| H1N1pdm09  | 0.485 (0.234, 0.736)                                             | Period 1: 3.342 (2.848, 3.764)<br>Period 2: 1.307 (0.782, 1.904)<br>Period 3: 2.328 (1.937, 2.695) | 1.101 (0.827, 1.399)                                              |
| H3N2       | 0.810 (0.593, 1.006)                                             | Period 1: 3.053 (2.668, 3.516)<br>Period 2: 0.622 (0.411, 0.845)<br>Period 3: 1.667 (1.410, 1.888) | 1.177 (0.891, 1.521)                                              |
| B/Victoria | 0.483 (0.288, 0.669)                                             | Period 1: 2.480 (2.110, 2.877)<br>Period 2: 0.963 (0.670, 1.271)<br>Period 3: 1.728 (1.500, 1.947) | 1.407 (1.060, 1.766)                                              |
| B/Yamagata | -                                                                | -                                                                                                  | 1.030 (0.773, 1.292)                                              |

895  
896

\* Posterior mean and 95% HPD intervals were summarised under the even sub-sampling strategy here.

897  
898

**Supplementary Table 5. Selection pressures ( $d_N/d_S$  ratio) and number of sites under positive selection of influenza viruses.**

| Subtypes/lineages | Time spans                 | $d_N/d_S$ | No. of sites under positive selection |
|-------------------|----------------------------|-----------|---------------------------------------|
| H1N1pdm09         | February 2011 to July 2023 | 0.225     | 4                                     |
| H3N2              | February 2011 to July 2023 | 0.234     | 15                                    |
| B/Victoria        | January 2011 to July 2023  | 0.166     | 4                                     |
| B/Yamagata        | January 2011 to March 2020 | 0.136     | 1                                     |

899

## References

1. Lemey P, Rambaut A, Bedford T, et al. Unifying viral genetics and human transportation data to predict the global transmission dynamics of human influenza H3N2. *PLoS pathogens* 2014; **10**(2): e1003932.
2. Yuan H, Kramer SC, Lau EHY, Cowling BJ, Yang W. Modeling influenza seasonality in the tropics and subtropics. *PLoS computational biology* 2021; **17**(6): e1009050.
3. Bedford T, Suchard MA, Lemey P, et al. Integrating influenza antigenic dynamics with molecular evolution. *eLife* 2014; **3**: e01914.
4. Lafond KE, Porter RM, Whaley MJ, et al. Global burden of influenza-associated lower respiratory tract infections and hospitalizations among adults: A systematic review and meta-analysis. *PLoS medicine* 2021; **18**(3): e1003550.
5. Brockmann D, Helbing D. The hidden geometry of complex, network-driven contagion phenomena. *Science (New York, NY)* 2013; **342**(6164): 1337-42.
6. Kakoullis L, Steffen R, Osterhaus A, et al. Influenza: seasonality and travel-related considerations. *Journal of travel medicine* 2023; **30**(5).
7. Charu V, Zeger S, Gog J, et al. Human mobility and the spatial transmission of influenza in the United States. *PLoS computational biology* 2017; **13**(2): e1005382.
8. Han AX, de Jong SPJ, Russell CA. Co-evolution of immunity and seasonal influenza viruses. *Nature reviews Microbiology* 2023.
9. Qi Y, Shaman J, Pei S. Quantifying the Impact of COVID-19 Nonpharmaceutical Interventions on Influenza Transmission in the United States. *The Journal of infectious diseases* 2021; **224**(9): 1500-8.
10. Eden JS, Sikazwe C, Xie R, et al. Off-season RSV epidemics in Australia after easing of COVID-19 restrictions. *Nature communications* 2022; **13**(1): 2884.
11. Paget J, Caini S, Del Riccio M, van Waarden W, Meijer A. Has influenza B/Yamagata become extinct and what implications might this have for quadrivalent influenza vaccines? *Euro surveillance : bulletin Europeen sur les maladies transmissibles = European communicable disease bulletin* 2022; **27**(39).
12. World Health Organization. Recommended composition of influenza virus vaccines for use in the 2024 southern hemisphere influenza season. 2023. <https://www.who.int/news/item/29-09-2023-recommended-composition-of-influenza-virus-vaccines-for-use-in-the-2024-southern-hemisphere-influenza-season>.
13. World Health Organization. Global Influenza Programme. <https://www.who.int/teams/global-influenza-programme/vaccines>.
14. Russell CA, Jones TC, Barr IG, et al. The global circulation of seasonal influenza A (H3N2) viruses. *Science (New York, NY)* 2008; **320**(5874): 340-6.
15. Bedford T, Riley S, Barr IG, et al. Global circulation patterns of seasonal influenza viruses vary with antigenic drift. *Nature* 2015; **523**(7559): 217-20.
16. Hay AJ, McCauley JW. The WHO global influenza surveillance and response system (GISRS)-A future perspective. *Influenza and other respiratory viruses* 2018; **12**(5): 551-7.
17. World Health Organization. Global Influenza Surveillance and Response System (GISRS). <https://www.who.int/initiatives/global-influenza-surveillance-and-response-system>.
18. World Health Organization. Review of global influenza circulation, late 2019 to 2020, and the impact of the COVID-19 pandemic on influenza circulation. 2021. <https://www.who.int/publications/i/item/who-wer-9625-241-264>.
19. Elbe S, Buckland-Merrett G. Data, disease and diplomacy: GISAID's innovative contribution to global health. *Global challenges (Hoboken, NJ)* 2017; **1**(1): 33-46.
20. Elliott P, Eales O, Steyn N, et al. Twin peaks: The Omicron SARS-CoV-2 BA.1 and BA.2 epidemics in England. *Science (New York, NY)* 2022; **376**(6600): eabq4411.
21. Saverio C, Adam M, Marta CN, et al. Is influenza B/Yamagata extinct and what public health implications could this have? An updated literature review and comprehensive assessment of global surveillance databases. *medRxiv* 2023: 2023.09.25.23296068.
22. Dalziel BD, Kissler S, Gog JR, et al. Urbanization and humidity shape the intensity of influenza epidemics in U.S. cities. *Science (New York, NY)* 2018; **362**(6410): 75-9.
23. Brownstein JS, Wolfe CJ, Mandl KD. Empirical evidence for the effect of airline travel on inter-regional influenza spread in the United States. *PLoS medicine* 2006; **3**(10): e401.



- 950 24. Xie R, Adam DC, Edwards KM, et al. Genomic epidemiology of seasonal influenza circulation in China during  
951 prolonged border closure from 2020 to 2021. *Virus evolution* 2022; **8**(2): veac062.
- 952 25. Lemey P, Ruktanonchai N, Hong SL, et al. Untangling introductions and persistence in COVID-19 resurgence in  
953 Europe. *Nature* 2021; **595**(7869): 713-7.
- 954 26. Huddleston J, Barnes JR, Rowe T, et al. Integrating genotypes and phenotypes improves long-term forecasts of  
955 seasonal influenza A/H3N2 evolution. *eLife* 2020; **9**.
- 956 27. Layan M, Müller NF, Dellicour S, et al. Impact and mitigation of sampling bias to determine viral spread: Evaluating  
957 discrete phylogeography through CTMC modeling and structured coalescent model approximations. *Virus evolution*  
958 2023; **9**(1): vead010.
- 959 28. Dudas G, Bedford T, Lycett S, Rambaut A. Reassortment between influenza B lineages and the emergence of a  
960 coadapted PB1-PB2-HA gene complex. *Mol Biol Evol* 2015; **32**(1): 162-72.
- 961 29. Rambaut A, Pybus OG, Nelson MI, Viboud C, Taubenberger JK, Holmes EC. The genomic and epidemiological  
962 dynamics of human influenza A virus. *Nature* 2008; **453**(7195): 615-9.
- 963 30. Kistler KE, Bedford T. An atlas of continuous adaptive evolution in endemic human viruses. *Cell host & microbe*  
964 2023.
- 965 31. Vijaykrishna D, Holmes EC, Joseph U, et al. The contrasting phylodynamics of human influenza B viruses. *eLife*  
966 2015; **4**: e05055.
- 967 32. Yan L, Neher RA, Shraiman BI. Phylodynamic theory of persistence, extinction and speciation of rapidly adapting  
968 pathogens. *eLife* 2019; **8**.
- 969 33. Rachel EB, Qiqi Y, Colin JW, et al. Implications of climatic and demographic change for seasonal influenza  
970 dynamics and evolution. *medRxiv* 2021: 2021.02.11.21251601.
- 971 34. Centers for Disease Control and Prevention. Weekly US Map: Influenza Summary Update. 2023.  
972 <https://www.cdc.gov/flu/weekly/usmap.htm>.
- 973 35. IATA. What can we learn from past pandemic episodes? 2020. [https://www.iata.org/en/iata-](https://www.iata.org/en/iata-repository/publications/economic-reports/what-can-we-learn-from-past-pandemic-episodes/)  
974 [repositary/publications/economic-reports/what-can-we-learn-from-past-pandemic-episodes/](https://www.iata.org/en/iata-repository/publications/economic-reports/what-can-we-learn-from-past-pandemic-episodes/).
- 975 36. Bedford T, Cobey S, Beerli P, Pascual M. Global migration dynamics underlie evolution and persistence of human  
976 influenza A (H3N2). *PLoS pathogens* 2010; **6**(5): e1000918.
- 977 37. Zhang B, Huang W, Pei S, et al. Mechanisms for the circulation of influenza A(H3N2) in China: A spatiotemporal  
978 modelling study. *PLoS pathogens* 2022; **18**(12): e1011046.
- 979 38. Dhanasekaran V, Sullivan S, Edwards KM, et al. Human seasonal influenza under COVID-19 and the potential  
980 consequences of influenza lineage elimination. *Nature communications* 2022; **13**(1): 1721.
- 981 39. Koutsakos M, Wheatley AK, Laurie K, Kent SJ, Rockman S. Influenza lineage extinction during the COVID-19  
982 pandemic? *Nature reviews Microbiology* 2021; **19**(12): 741-2.
- 983 40. Liu Y, Tan HX, Koutsakos M, et al. Cross-lineage protection by human antibodies binding the influenza B  
984 hemagglutinin. *Nature communications* 2019; **10**(1): 324.
- 985 41. Koelle K, Cobey S, Grenfell B, Pascual M. Epochal evolution shapes the phylodynamics of interpandemic influenza  
986 A (H3N2) in humans. *Science (New York, NY)* 2006; **314**(5807): 1898-903.
- 987 42. Conroy G. What's behind China's mysterious wave of childhood pneumonia? *Nature* 2023.
- 988 43. Oliver E, Freya S, James M. How immunity shapes the long-term dynamics of seasonal influenza. *medRxiv* 2023:  
989 2023.09.08.23295244.
- 990 44. Simon PJdJ, Zandra CFG, Joseph CG, et al. Potential impacts of prolonged absence of influenza virus circulation on  
991 subsequent epidemics. *medRxiv* 2022: 2022.02.05.22270494.
- 992 45. Brister JR, Ako-Adjei D, Bao Y, Blinkova O. NCBI viral genomes resource. *Nucleic acids research* 2015;  
993 **43**(Database issue): D571-7.
- 994 46. Katoh K, Standley DM. MAFFT Multiple Sequence Alignment Software Version 7: Improvements in Performance  
995 and Usability. *Molecular Biology and Evolution* 2013; **30**(4): 772-80.
- 996 47. Price MN, Dehal PS, Arkin AP. FastTree: computing large minimum evolution trees with profiles instead of a  
997 distance matrix. *Mol Biol Evol* 2009; **26**(7): 1641-50.
- 998 48. Hadfield J, Megill C, Bell SM, et al. Nextstrain: real-time tracking of pathogen evolution. *Bioinformatics* 2018;  
999 **34**(23): 4121-3.

- 000 49. He J, Hou S, Chen Y, et al. The Epidemiological Pattern and Co-infection of Influenza A and B by Surveillance  
001 Network From 2009 to 2014 in Anhui Province, China. *Frontiers in public health* 2022; **10**: 825645.
- 002 50. Liu P, Song Y, Colijn C, MacPherson A. The impact of sampling bias on viral phylogeographic reconstruction.  
003 *PLOS Global Public Health* 2022; **2**(9): e0000577.
- 004 51. Guindon S, De Maio N. Accounting for spatial sampling patterns in Bayesian phylogeography. *Proceedings of the*  
005 *National Academy of Sciences of the United States of America* 2021; **118**(52).
- 006 52. Nguyen L-T, Schmidt HA, von Haeseler A, Minh BQ. IQ-TREE: A Fast and Effective Stochastic Algorithm for  
007 Estimating Maximum-Likelihood Phylogenies. *Molecular Biology and Evolution* 2014; **32**(1): 268-74.
- 008 53. Kalyaanamoorthy S, Minh BQ, Wong TKF, von Haeseler A, Jermin LS. ModelFinder: fast model selection for  
009 accurate phylogenetic estimates. *Nat Methods* 2017; **14**(6): 587-9.
- 010 54. Rambaut A, Lam TT, Max Carvalho L, Pybus OG. Exploring the temporal structure of heterochronous sequences  
011 using TempEst (formerly Path-O-Gen). *Virus evolution* 2016; **2**(1).
- 012 55. Sagulenko P, Puller V, Neher RA. TreeTime: Maximum-likelihood phylodynamic analysis. *Virus evolution* 2018;  
013 **4**(1).
- 014 56. Suchard MA, Lemey P, Baele G, Ayres DL, Drummond AJ, Rambaut A. Bayesian phylogenetic and phylodynamic  
015 data integration using BEAST 1.10. *Virus evolution* 2018; **4**(1): vey016.
- 016 57. Shapiro B, Rambaut A, Drummond AJ. Choosing appropriate substitution models for the phylogenetic analysis of  
017 protein-coding sequences. *Mol Biol Evol* 2006; **23**(1): 7-9.
- 018 58. Gill MS, Lemey P, Faria NR, Rambaut A, Shapiro B, Suchard MA. Improving Bayesian population dynamics  
019 inference: a coalescent-based model for multiple loci. *Mol Biol Evol* 2013; **30**(3): 713-24.
- 020 59. Rambaut A, Drummond AJ, Xie D, Baele G, Suchard MA. Posterior Summarization in Bayesian Phylogenetics  
021 Using Tracer 1.7. *Systematic biology* 2018; **67**(5): 901-4.
- 022 60. Cybis GB, Sinsheimer JS, Lemey P, Suchard MA. Graph hierarchies for phylogeography. *Philosophical transactions*  
023 *of the Royal Society of London Series B, Biological sciences* 2013; **368**(1614): 20120206.
- 024 61. Kosakovsky Pond SL, Frost SD. Not so different after all: a comparison of methods for detecting amino acid sites  
025 under selection. *Mol Biol Evol* 2005; **22**(5): 1208-22.
- 026 62. Murrell B, Moola S, Mabona A, et al. FUBAR: a fast, unconstrained bayesian approximation for inferring selection.  
027 *Mol Biol Evol* 2013; **30**(5): 1196-205.
- 028 63. Kosakovsky Pond SL, Poon AFY, Velazquez R, et al. HyPhy 2.5-A Customizable Platform for Evolutionary  
029 Hypothesis Testing Using Phylogenies. *Mol Biol Evol* 2020; **37**(1): 295-9.
- 030 64. Luksza M, Lässig M. A predictive fitness model for influenza. *Nature* 2014; **507**(7490): 57-61.
- 031 65. Abril-Pla O, Andreani V, Carroll C, et al. PyMC: a modern, and comprehensive probabilistic programming  
032 framework in Python. *PeerJ Computer science* 2023; **9**: e1516.
- 033 66. Edouard Mathieu, Hannah Ritchie, Lucas Rodés-Guirao, et al. Coronavirus Pandemic (COVID-19).  
034 OurWorldInData.org; 2020.
- 035 67. BLAVATNIK SCHOOL OF GOVERNMENT. COVID-19 Government Response Tracker. 2023.
- 036 68. Thierry Mayer, Zignago S. Notes on CEPII's distances measures: The GeoDist database. 2011.
- 037 69. Hersbach H, Muñoz Sabater, J., Nicolas, Rozum, I., Simmons, Vamborg, F., A., Bell, B., Berrisford, P., Biavati, G.,  
038 Buontempo, C., Horányi, A., J., Peubey, C., Radu, R., Schepers, D., Soci, C., Dee, D., Thépaut, J-N. Essential  
039 climate variables for assessment of climate variability from 1979 to present. 2018 (accessed Sep 20 2023).
- 040 70. Hale T, Angrist N, Goldszmidt R, et al. A global panel database of pandemic policies (Oxford COVID-19  
041 Government Response Tracker). *Nature human behaviour* 2021; **5**(4): 529-38.
- 042 71. Moore M, Gelfeld B, Okunogbe A, Paul C. Identifying Future Disease Hot S. *Rand health quarterly* 2017; **6**(3): 5.
- 043 72. United Nations. World Population Prospects 2022. 2022.
- 044
